# Supplementary material
Source: PubMed Central journal article supplement (PMC6482821)
Supplement: NIHMS1020195-supplement-SI.pdf [file NIHMS1020195-supplement-SI.pdf]

# Supporting Information

## A 5+1 Protic Acid-Assisted *aza*-Pummerer Approach for Synthesis of 4-Chloropiperidines From Homoallylic Amines

Rene Ebule,<sup>[a]</sup> Sagar Mudshinge,<sup>[a]</sup> Michael H. Nantz,<sup>[a]</sup> Gerald B. Hammond,<sup>[a],\*</sup>  
Bo Xu<sup>[b],\*</sup>

<sup>[a]</sup> Department of Chemistry, University of Louisville, Louisville, Kentucky 40292, USA. <sup>[b]</sup> College of Chemistry, Chemical Engineering and Biotechnology, Donghua University, 2999 North Renmin Lu, Shanghai 201620, China

[gb.hammond@louisville.edu](mailto:gb.hammond@louisville.edu); [bo.xu@dhu.edu.cn](mailto:bo.xu@dhu.edu.cn)

### Table of contents

|                                                                                                            |     |
|------------------------------------------------------------------------------------------------------------|-----|
| 1. Copies of NMR spectra for compounds <b>1</b> , <b>2</b> , <b>3</b> and <b>4</b> .....                   | S2  |
| 2. X-ray data for <b>2n</b> .....                                                                          | S86 |
| 2.1 Sample preparation and crystal structure determination.....                                            | S86 |
| 2.2 ORTEP representation of ( <b>2n</b> ) with thermal ellipsoids shown at the 50% probability level. .... | S86 |
| 3. References.....                                                                                         | S93 |

## 1. Copies of NMR spectra for compounds 1, 2, 3 and 4

Some of the starting materials and products; **1a** and **1e**,<sup>1</sup> **1b**, **1c**, **1d** and **1f**,<sup>2</sup> **1e**,<sup>2</sup> **1k**, **1aa**, and **1ag**,<sup>3</sup> **1ab**,<sup>4</sup> **1ae**,<sup>5</sup> **1ah**,<sup>6</sup> **3a**,<sup>7</sup> **3e**,<sup>8</sup> **3f**,<sup>9</sup> **2a**,<sup>10</sup> **2aa**,<sup>11</sup> **2ae**,<sup>12</sup> **2ag**,<sup>13</sup> are commercially available or reported compounds, their spectroscopic data agree well with the reported literature. Others are commercially available but do not have available spectral data. We report the HRMS data in the manuscript.

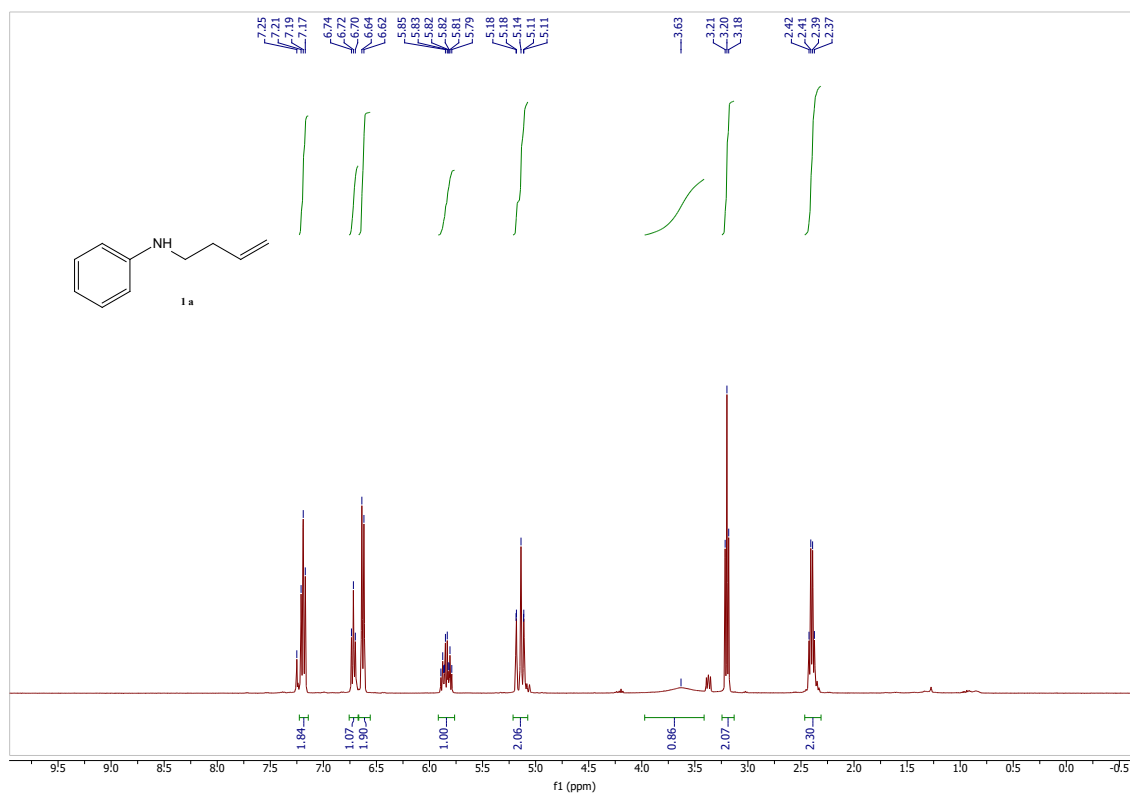

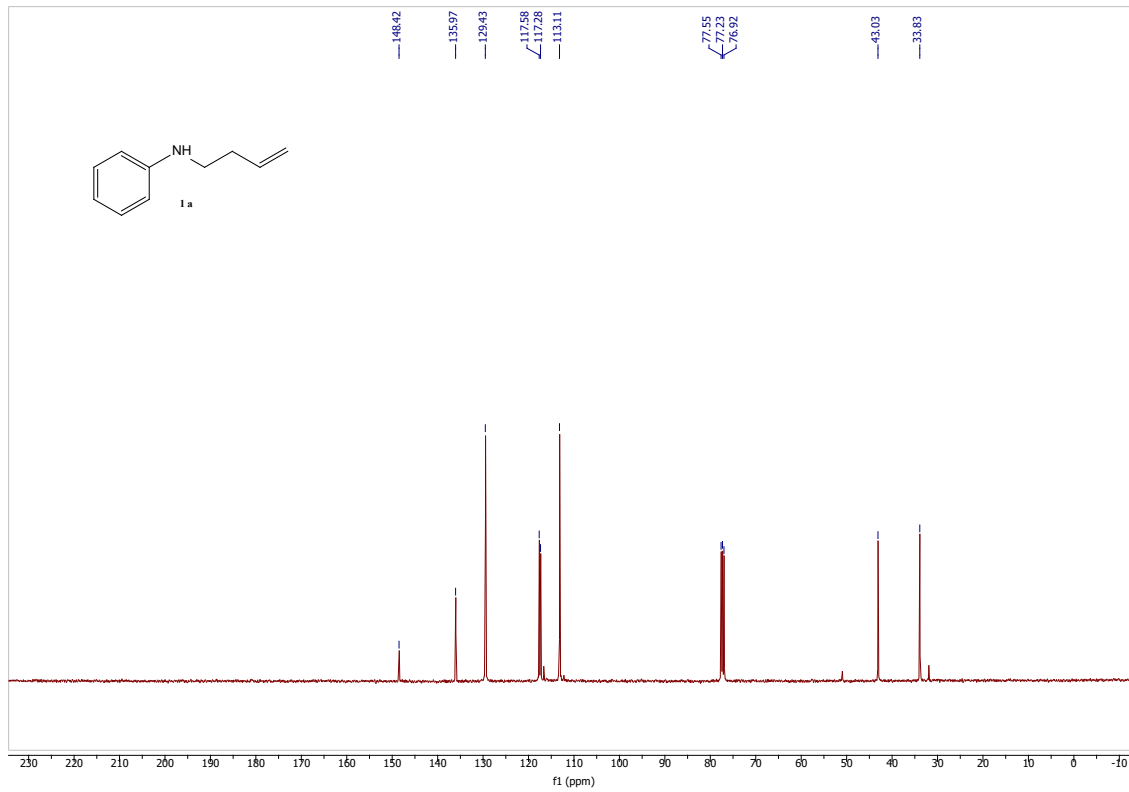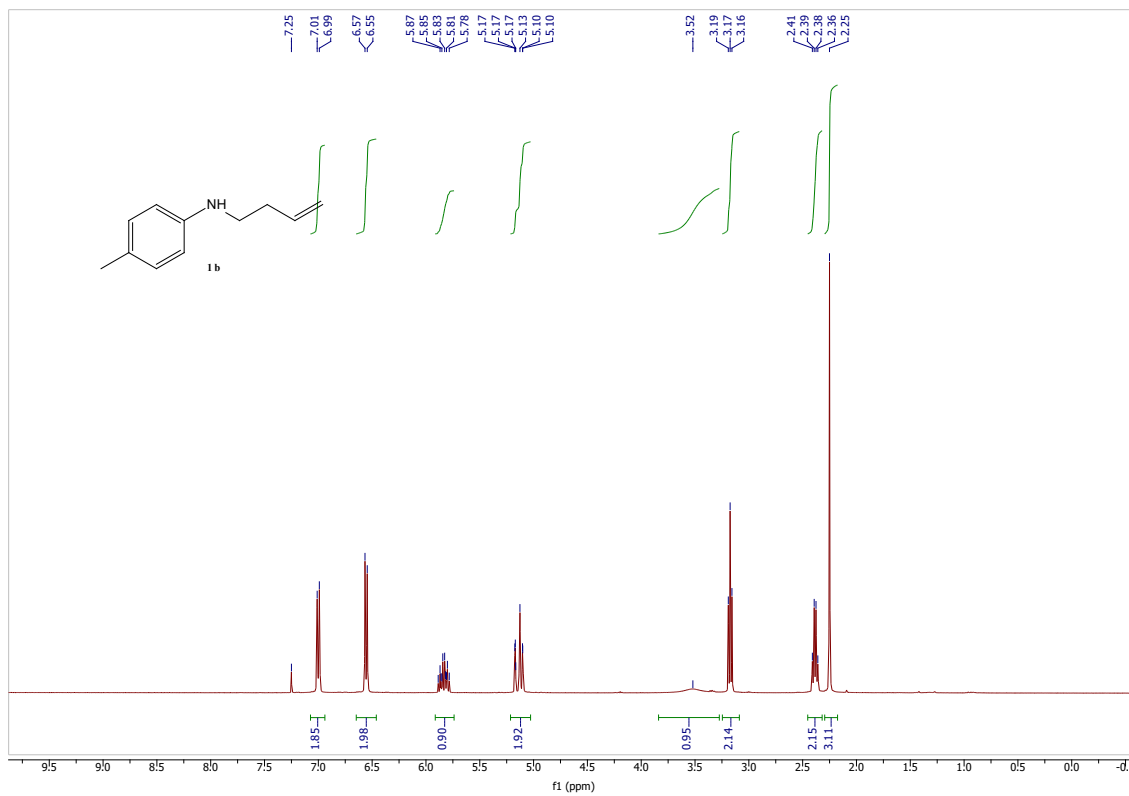

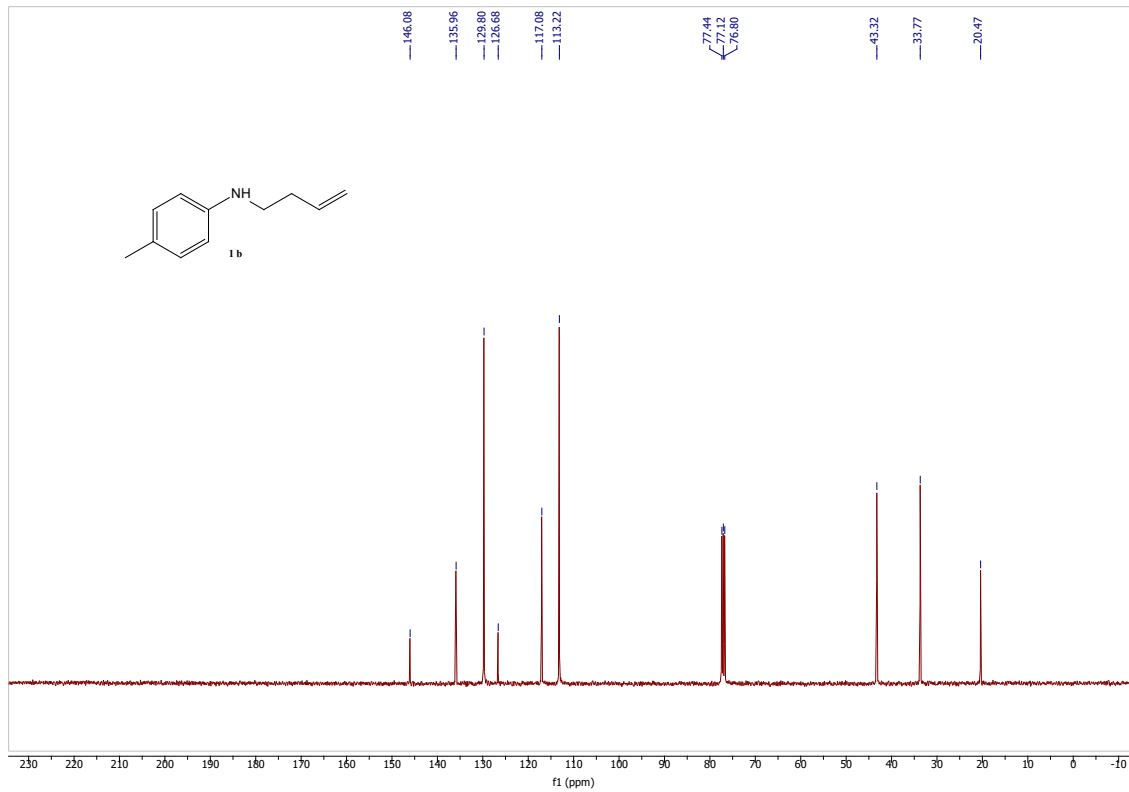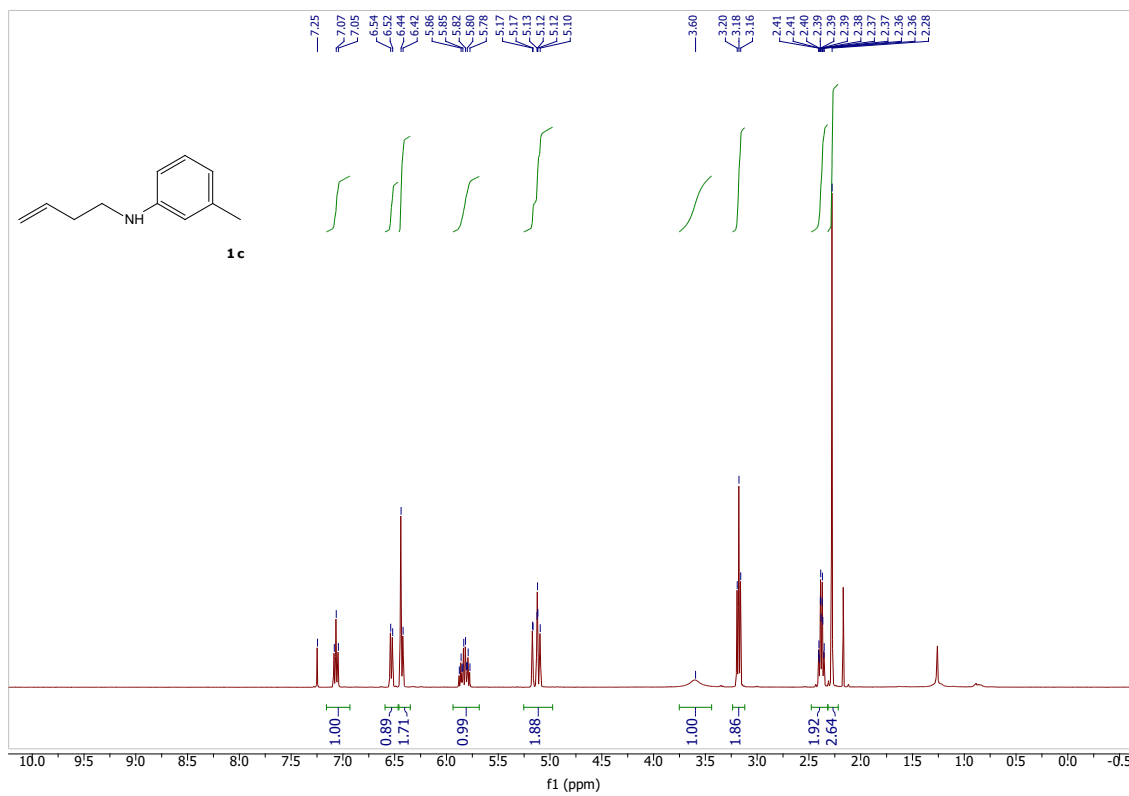



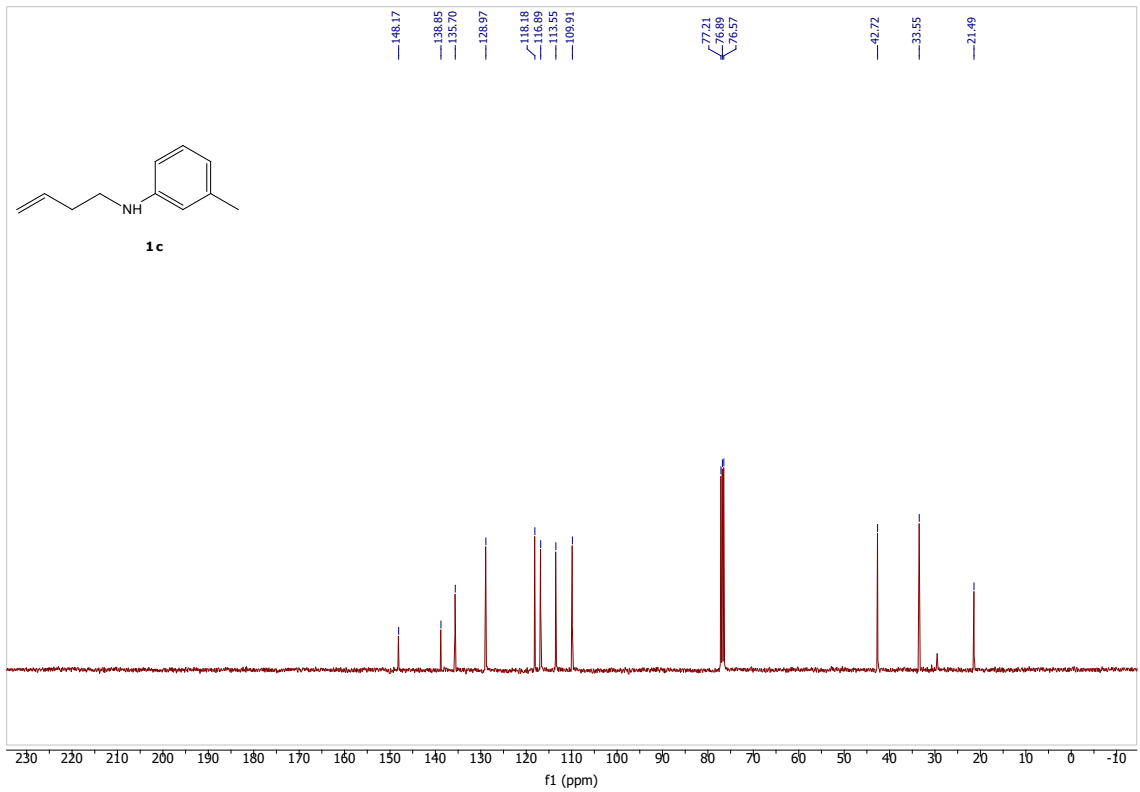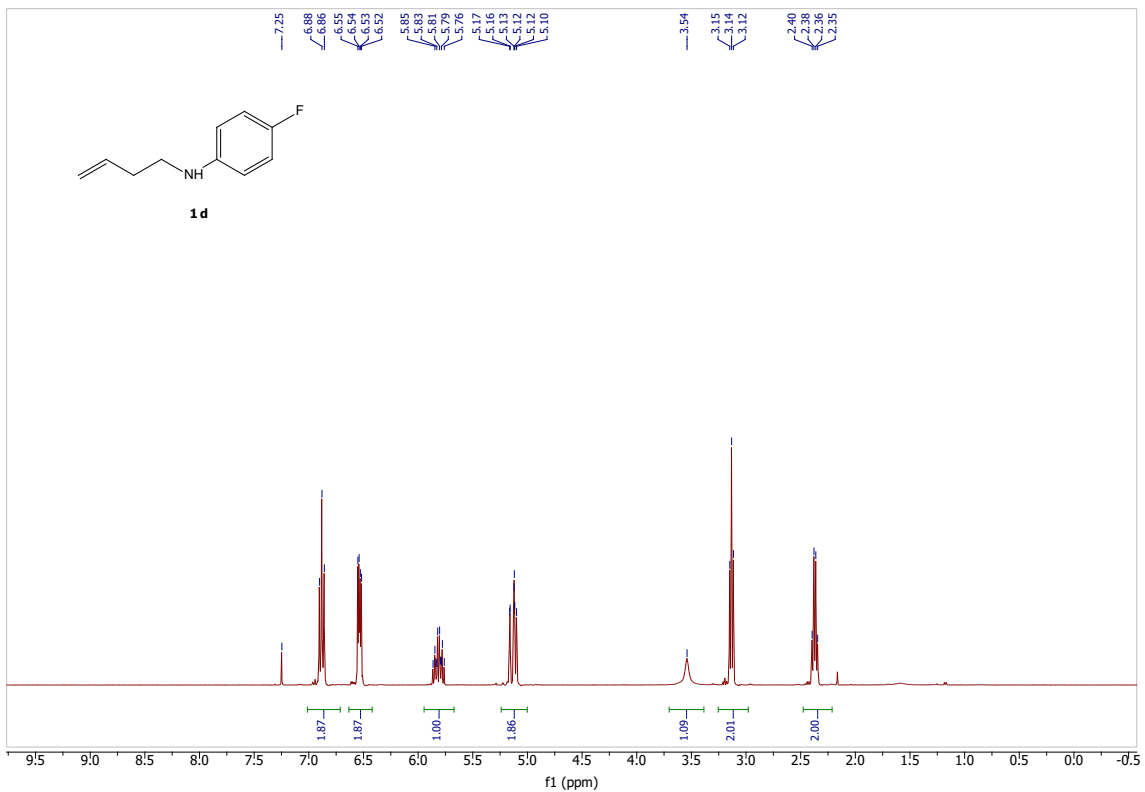

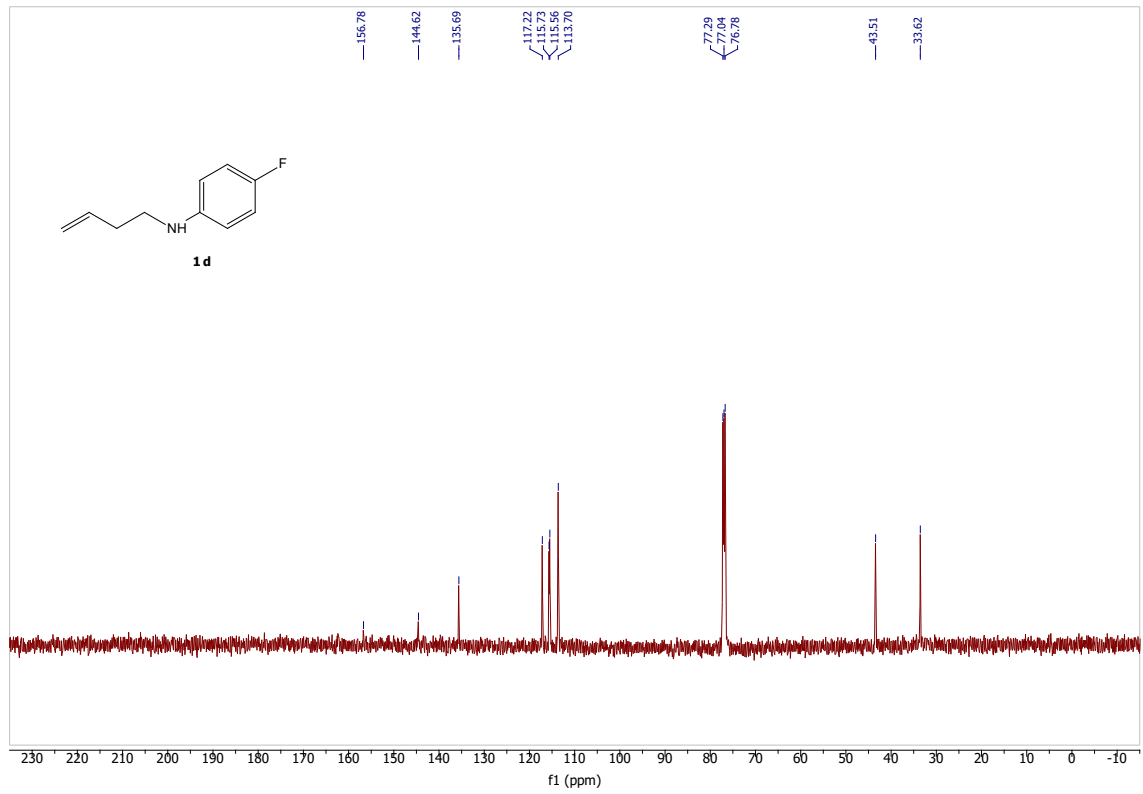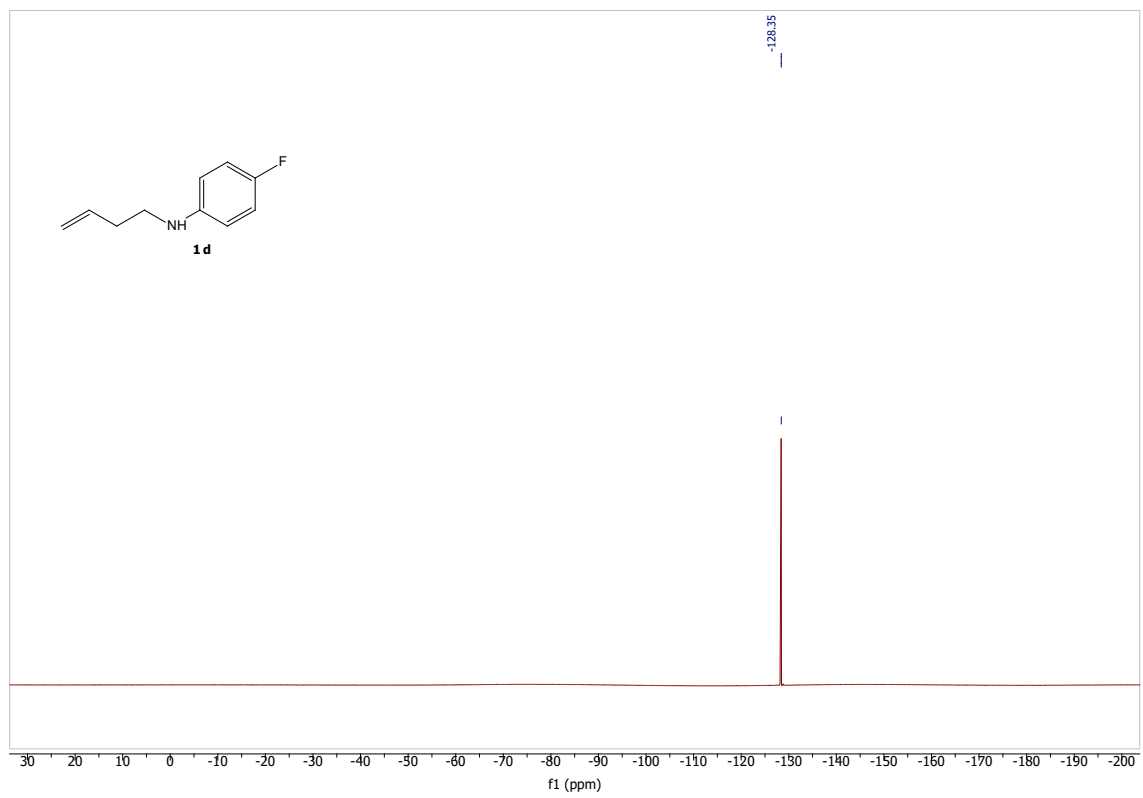

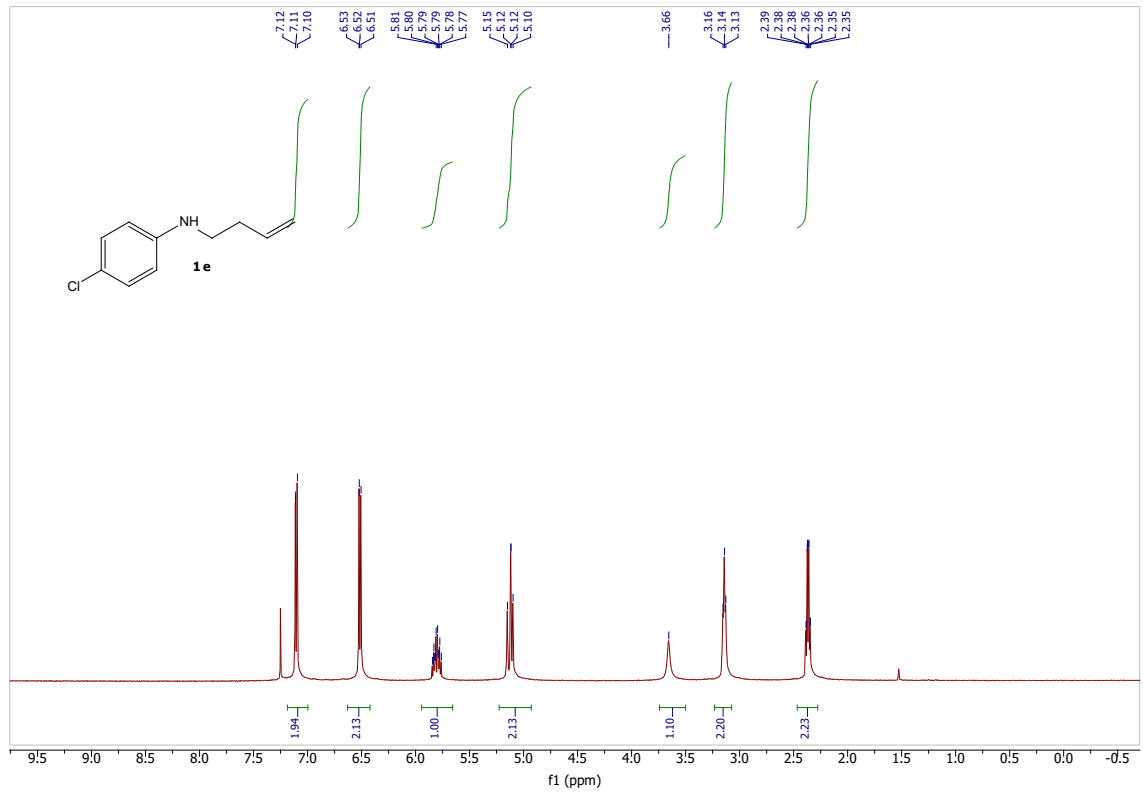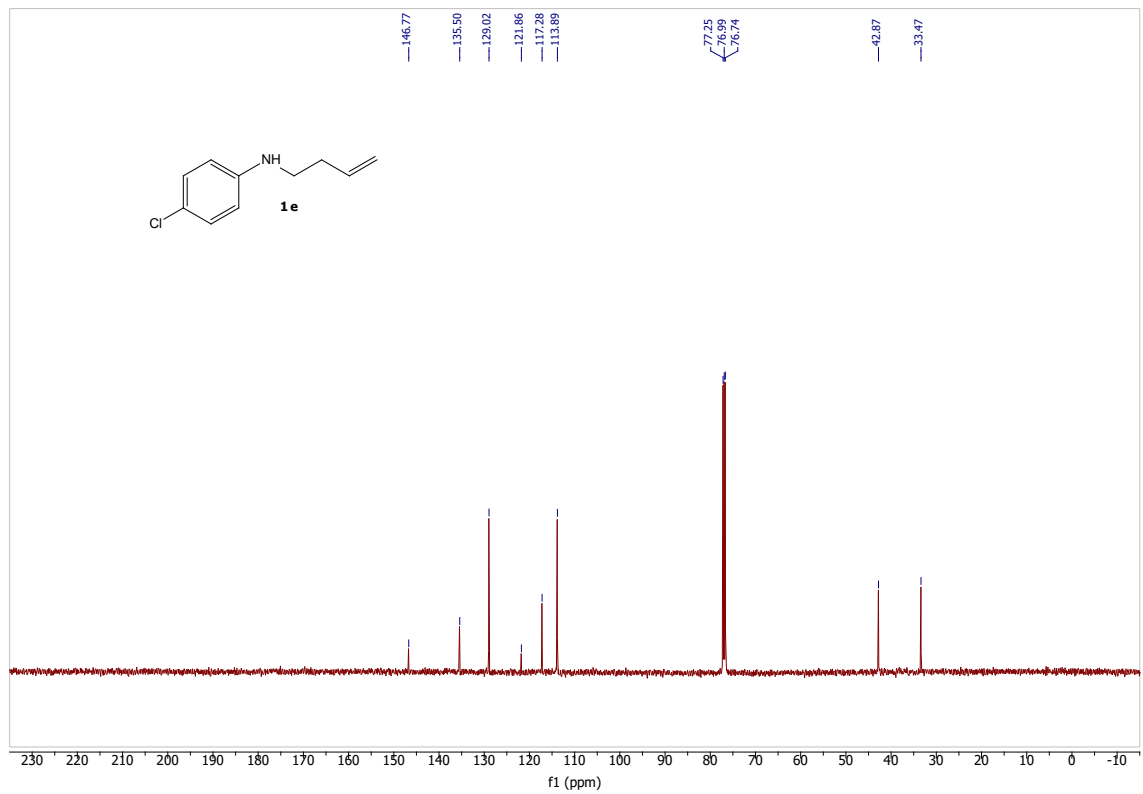

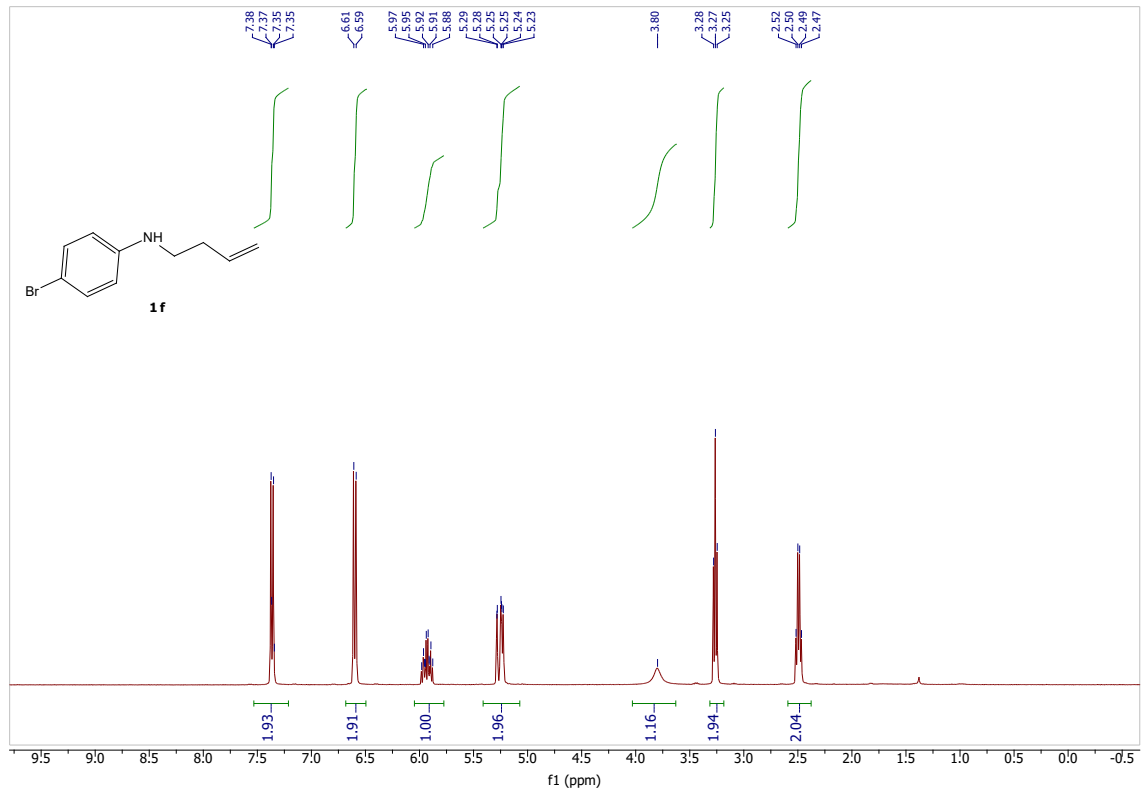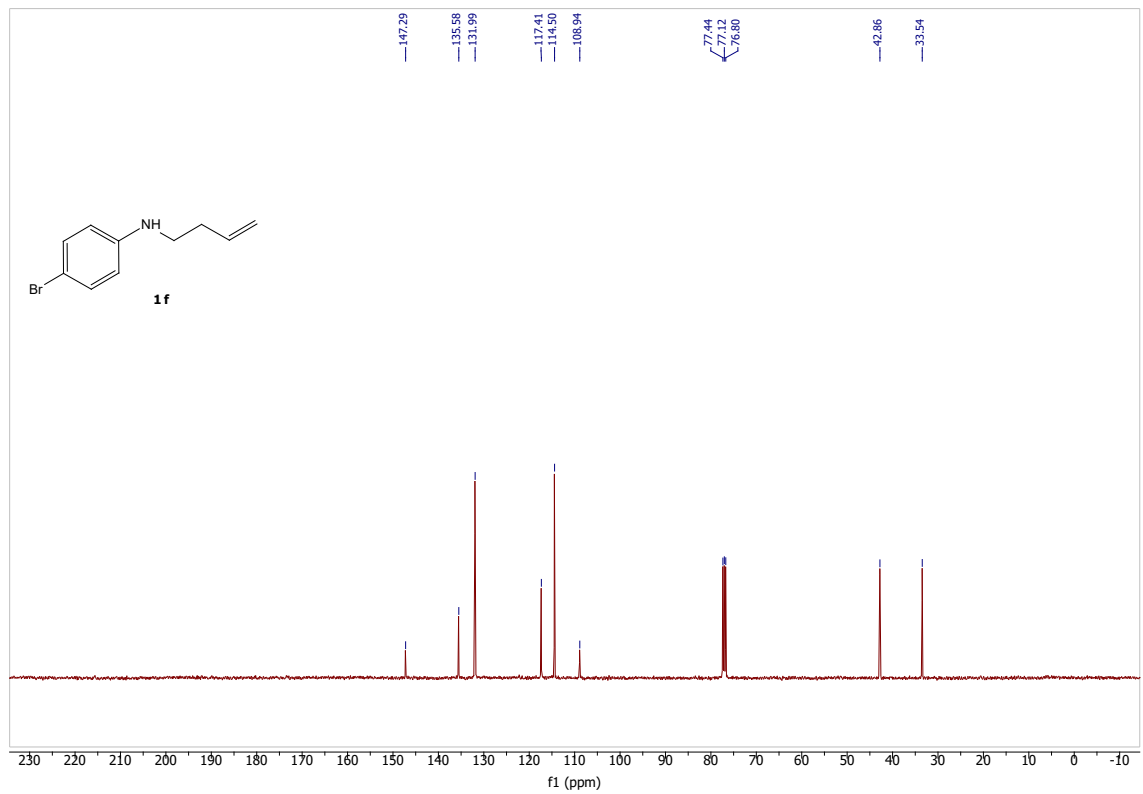

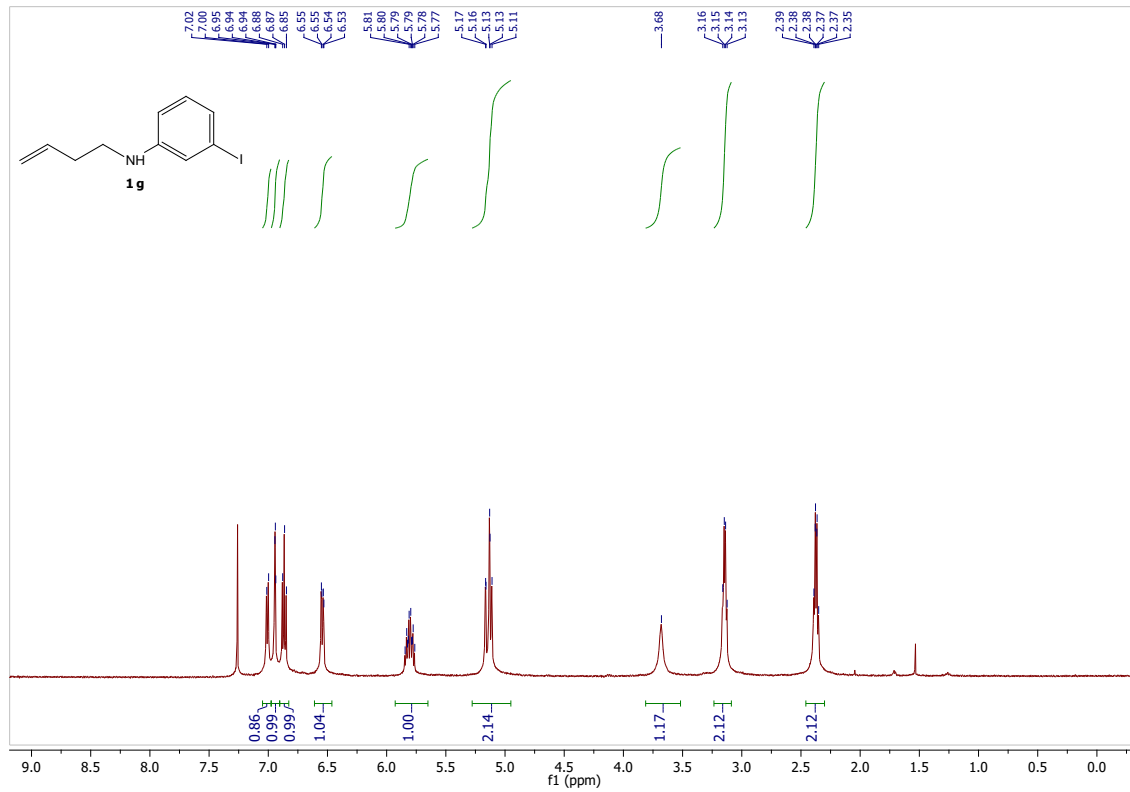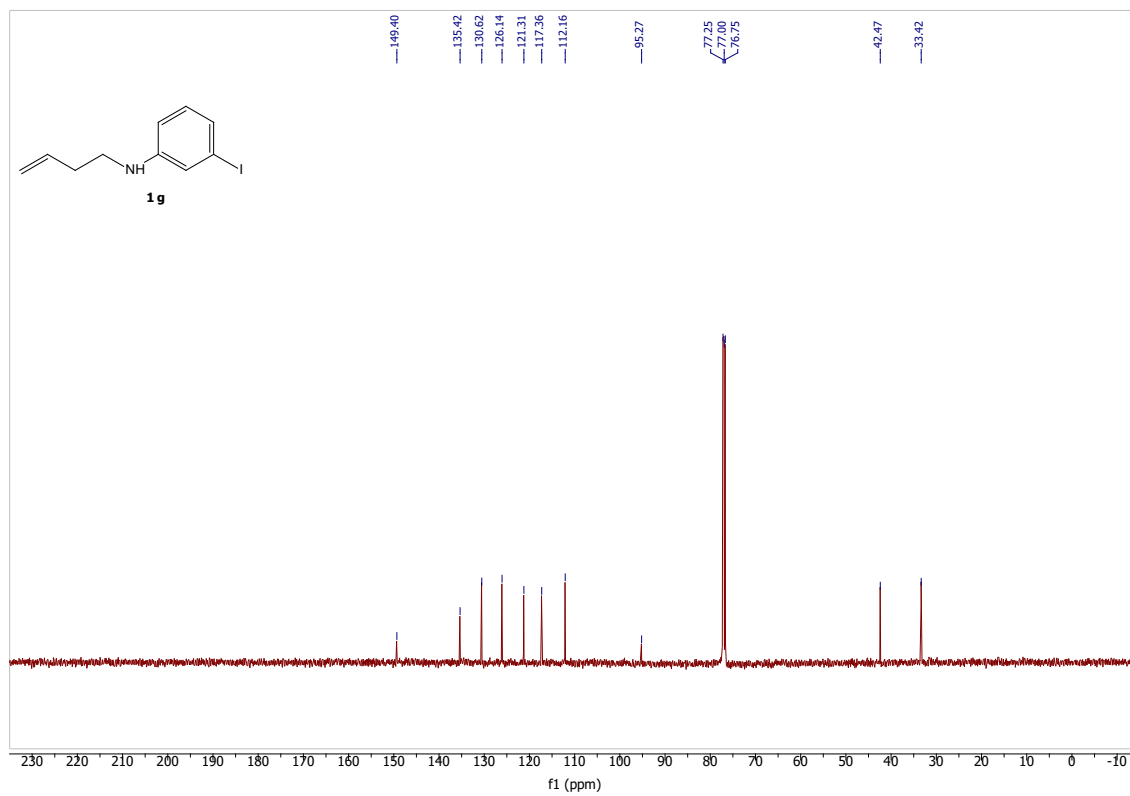

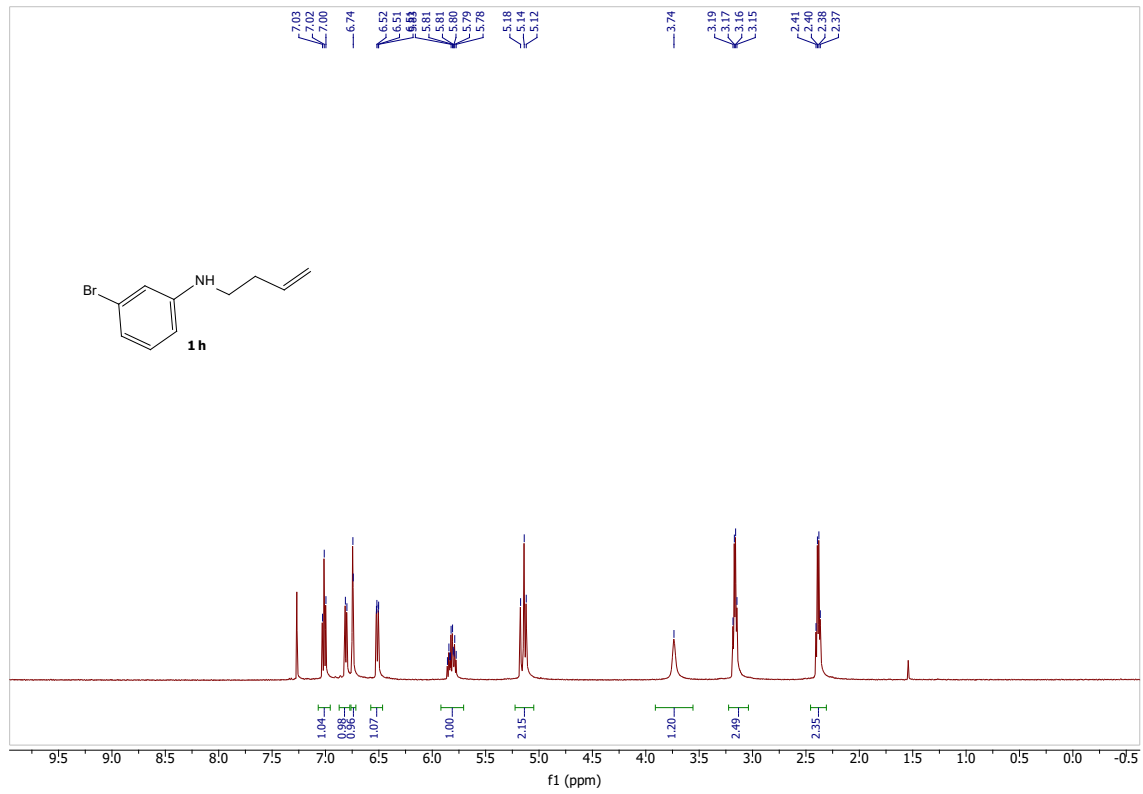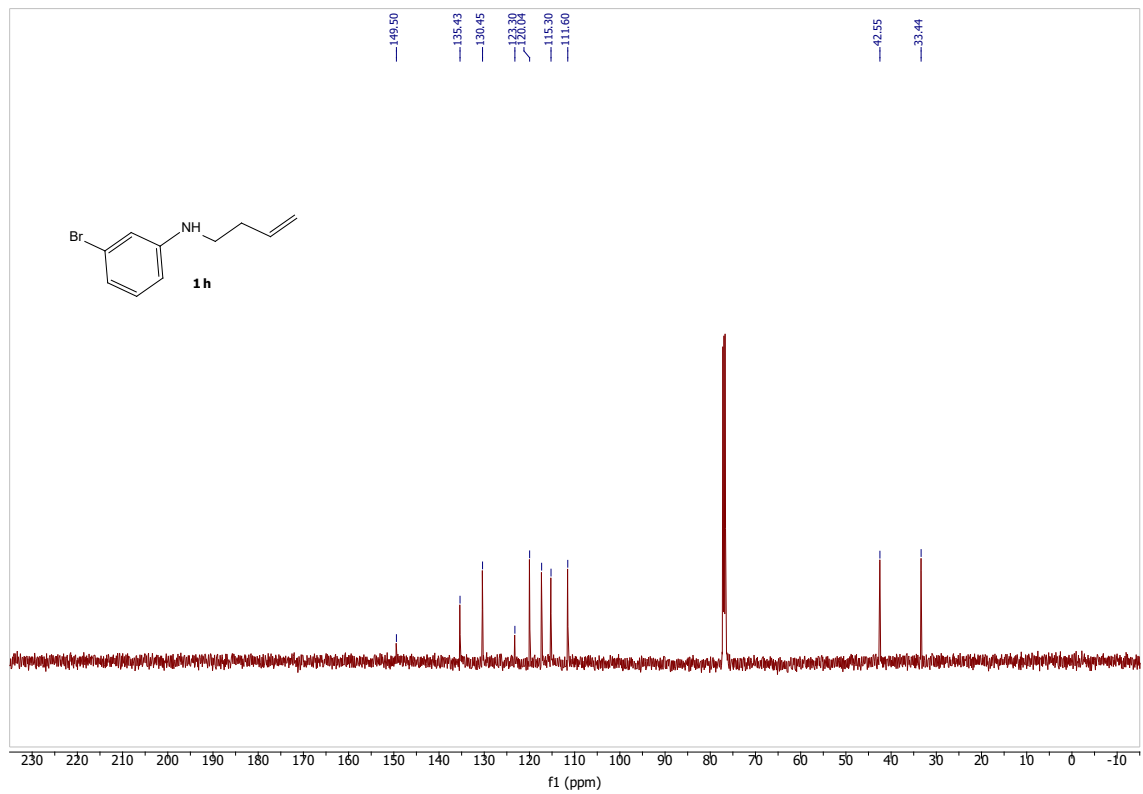

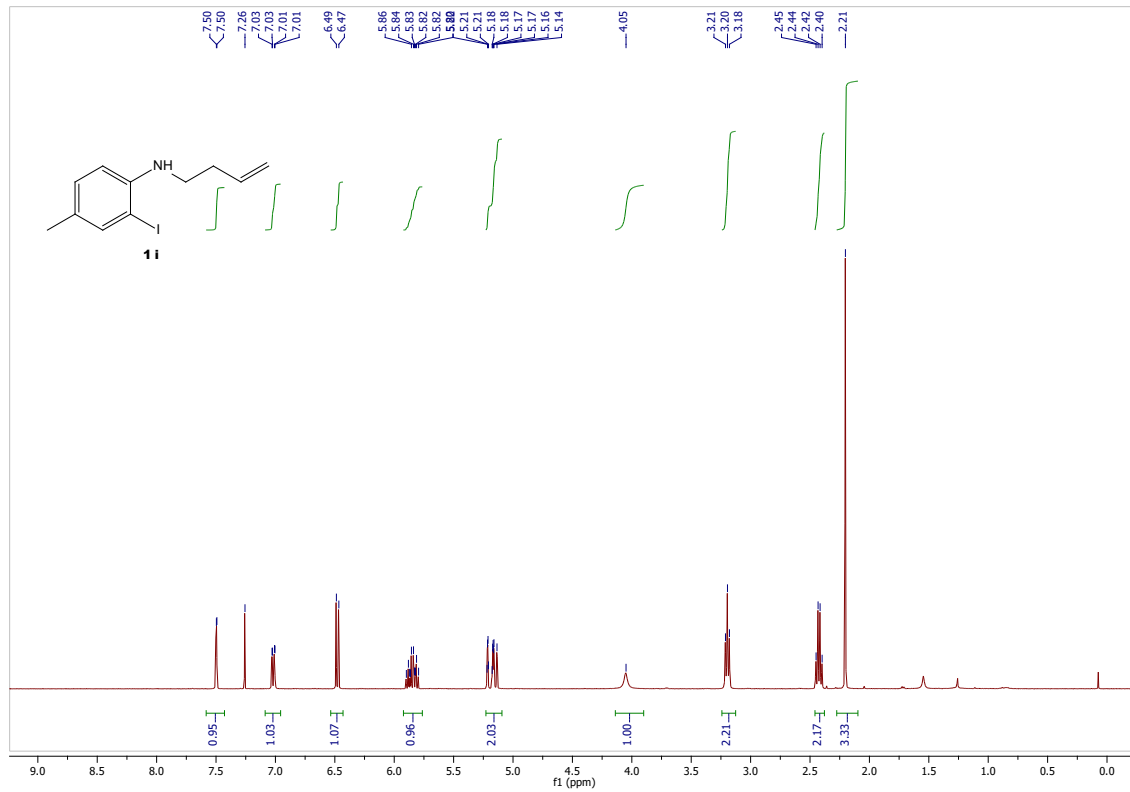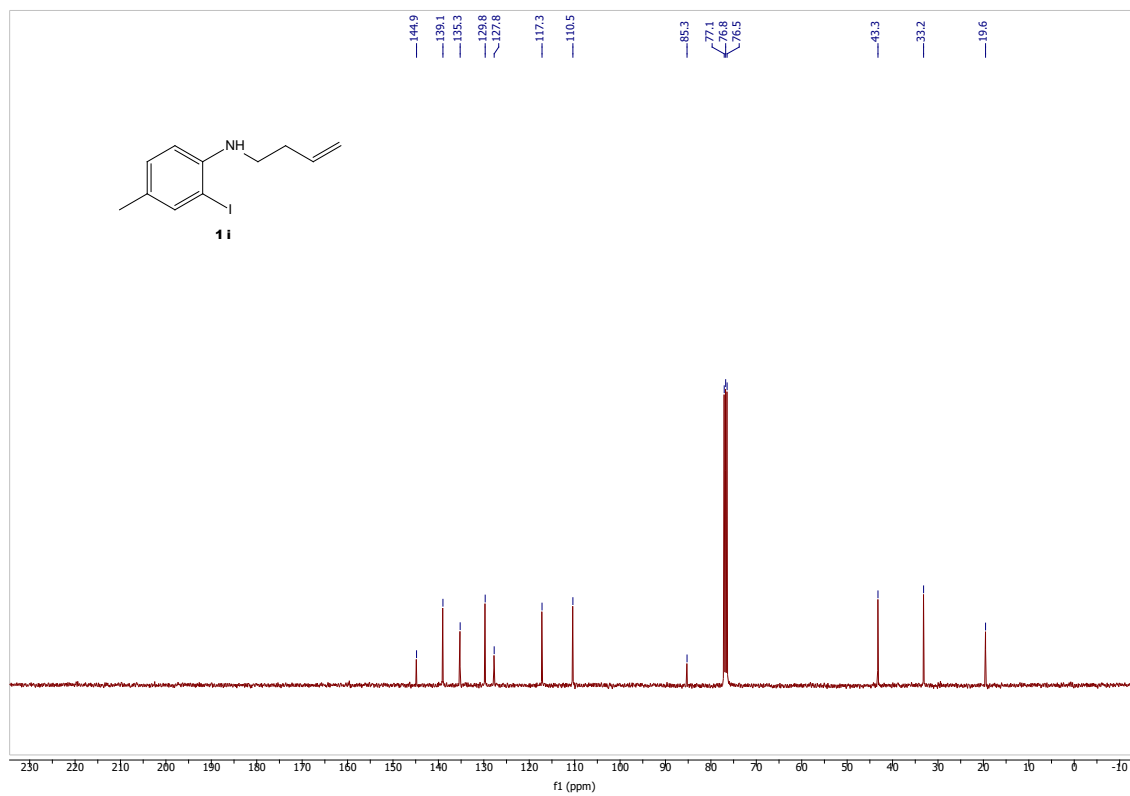

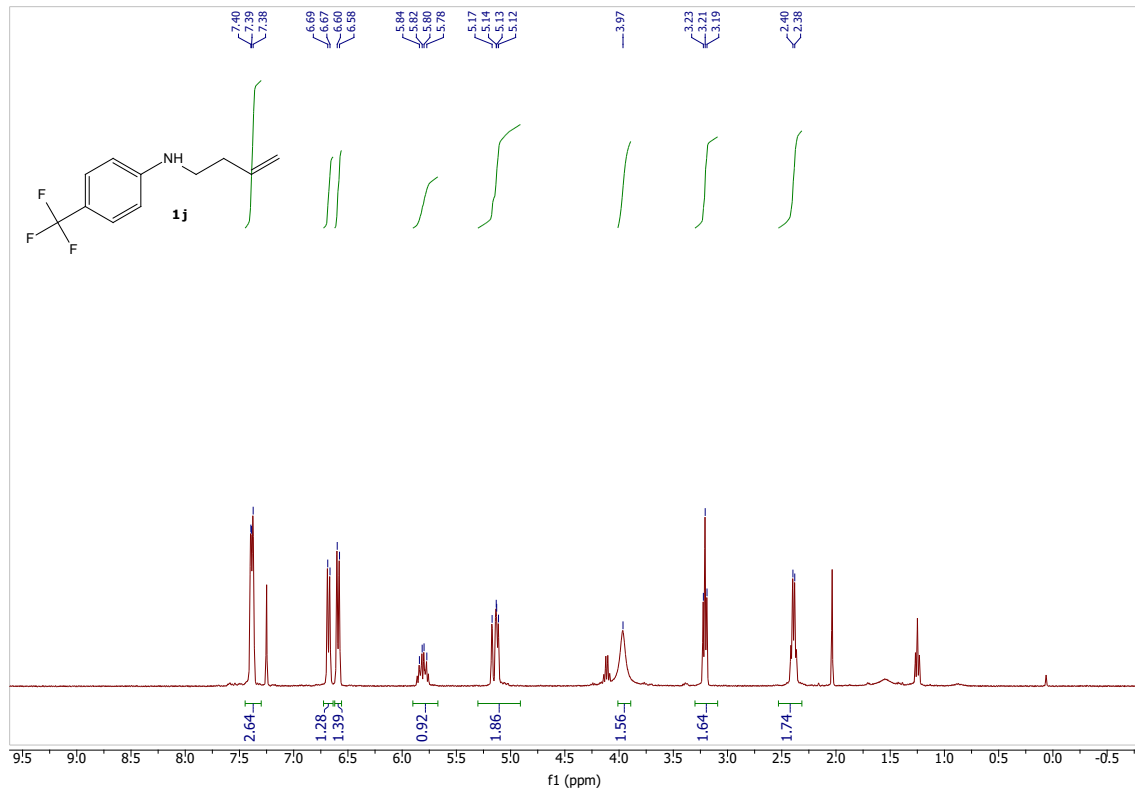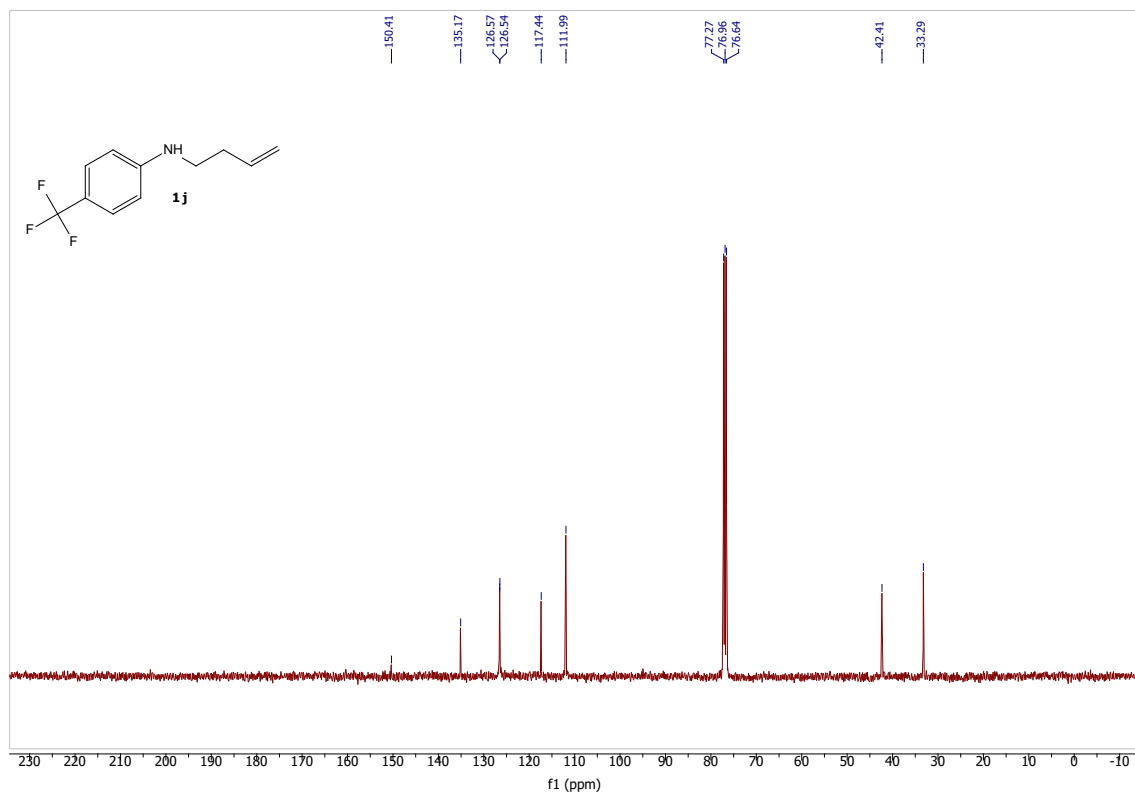



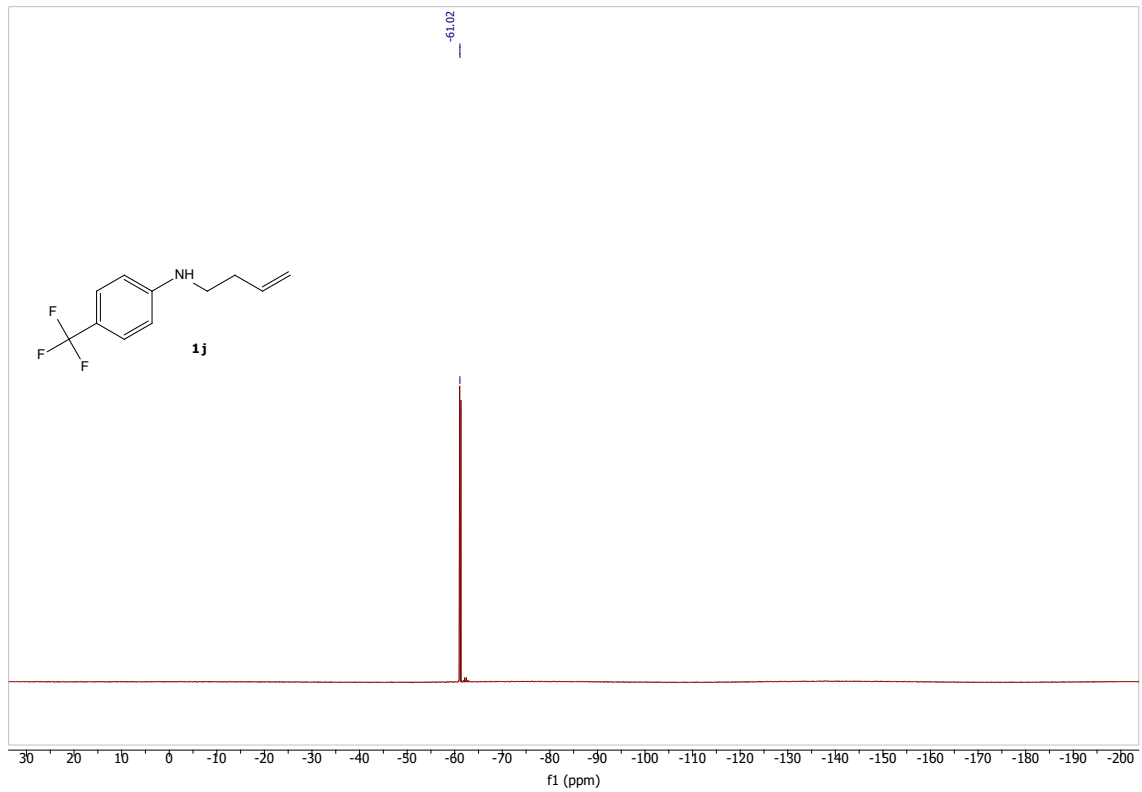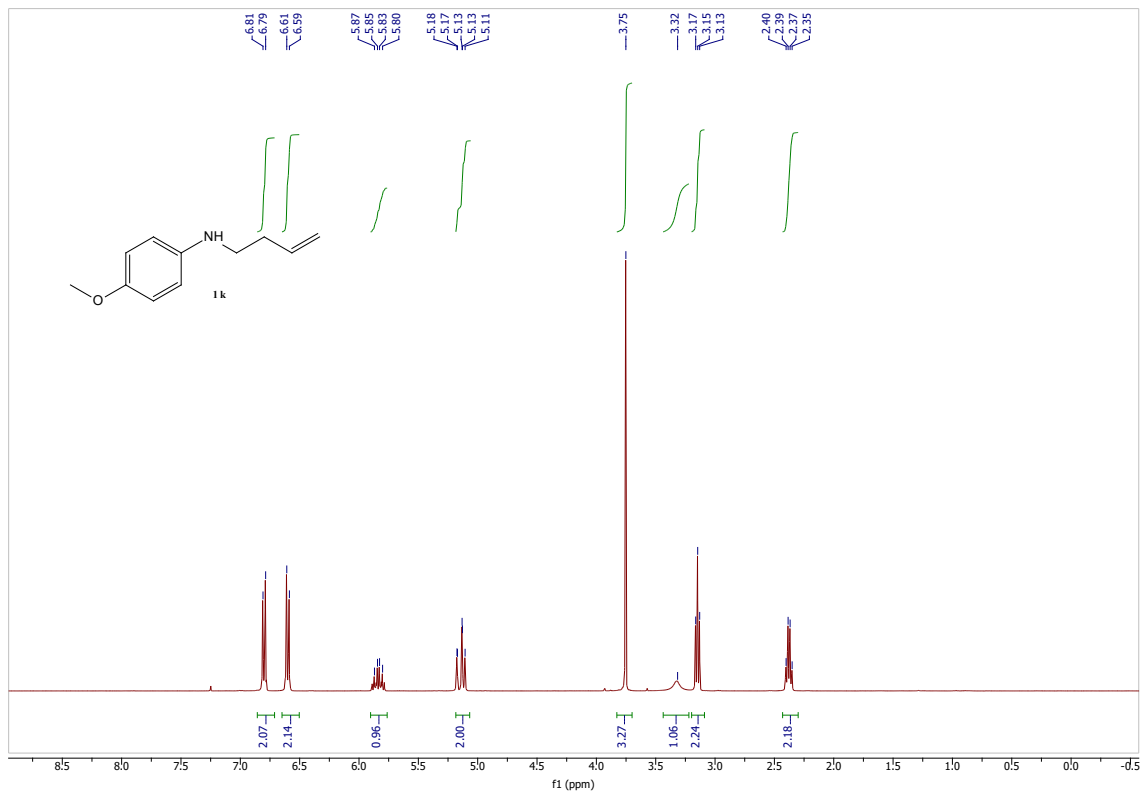

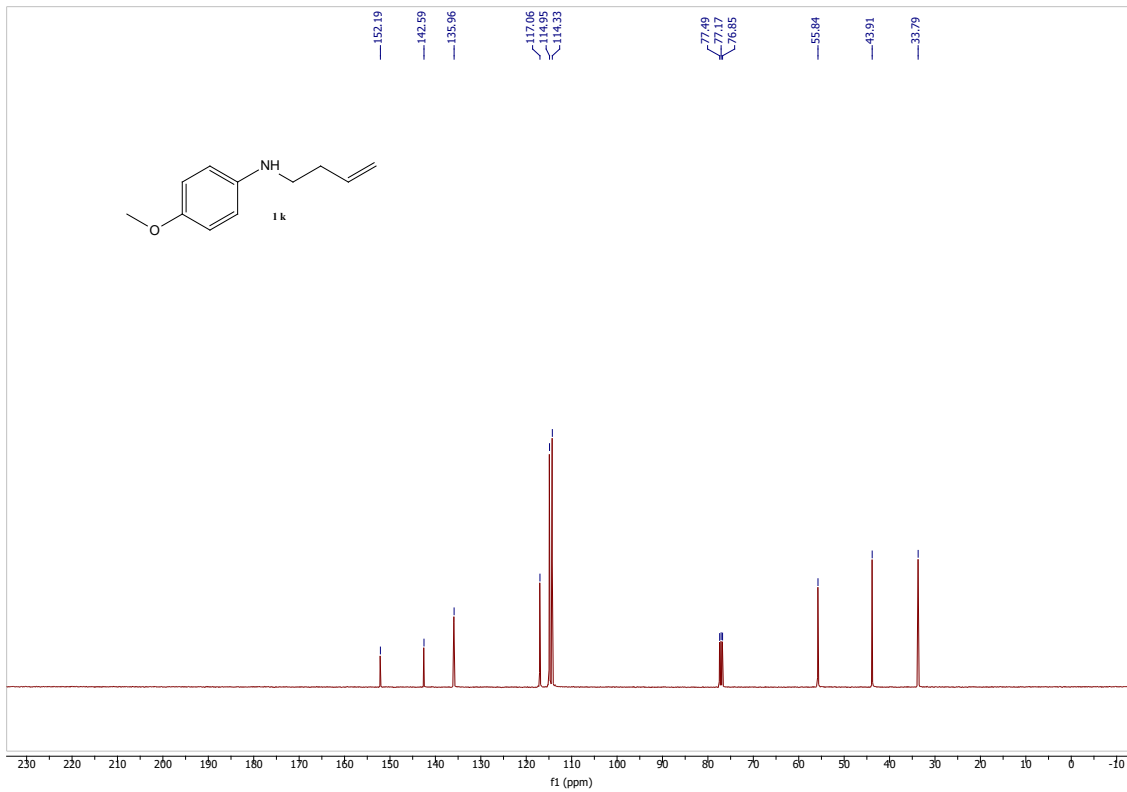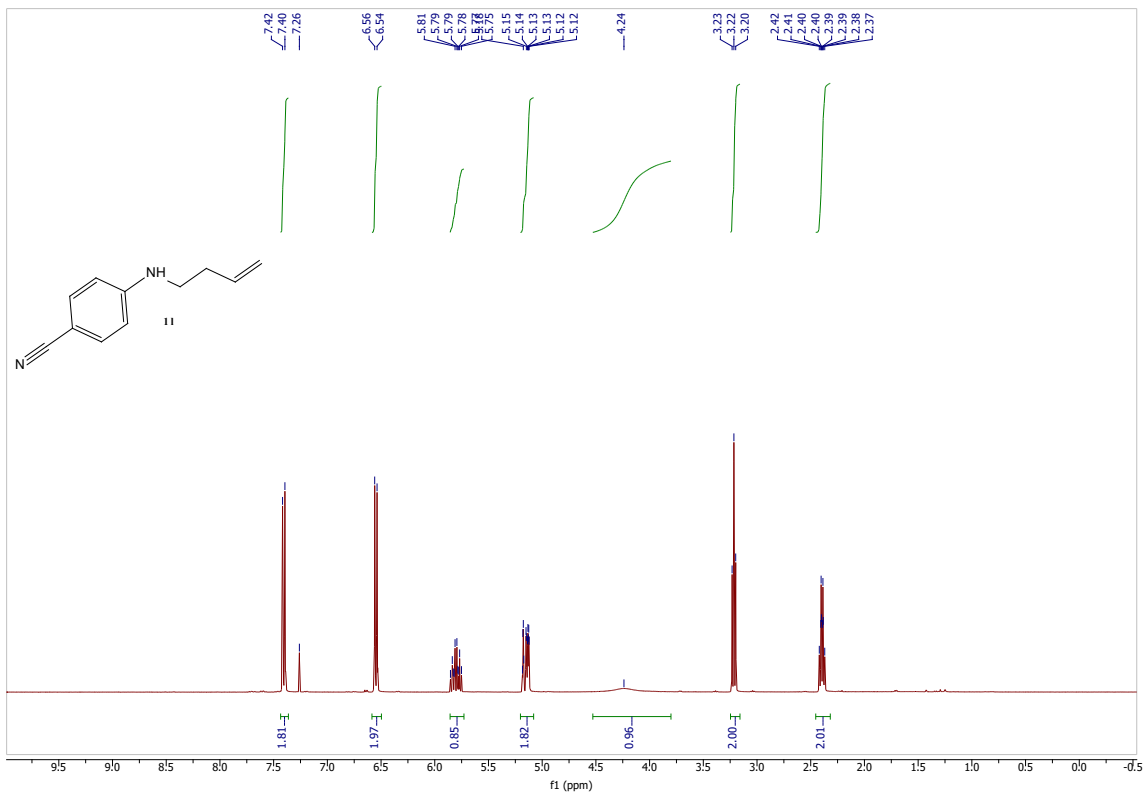

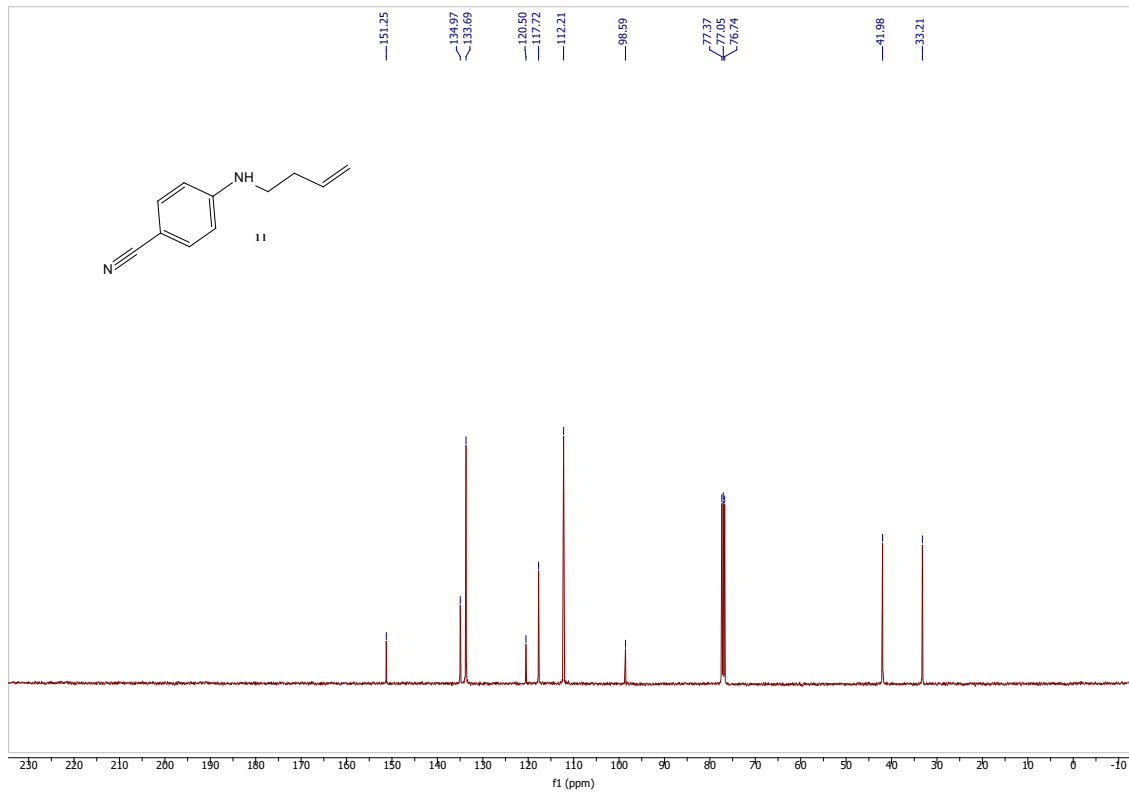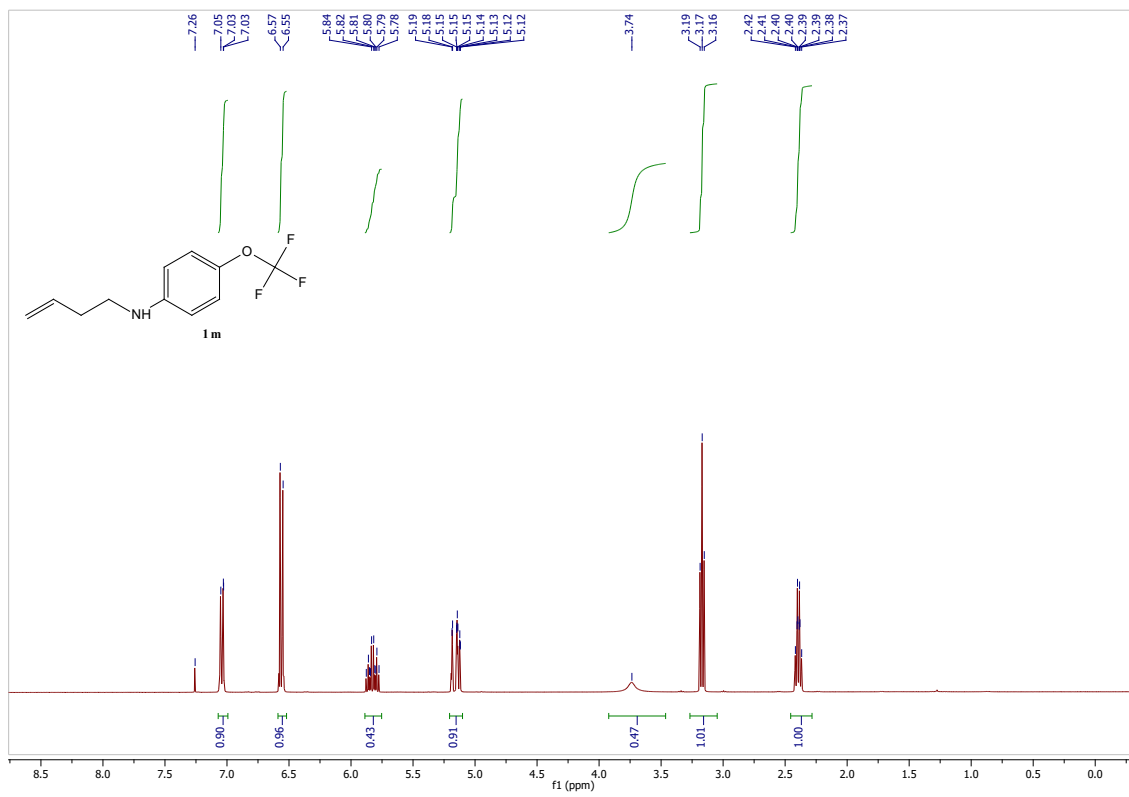

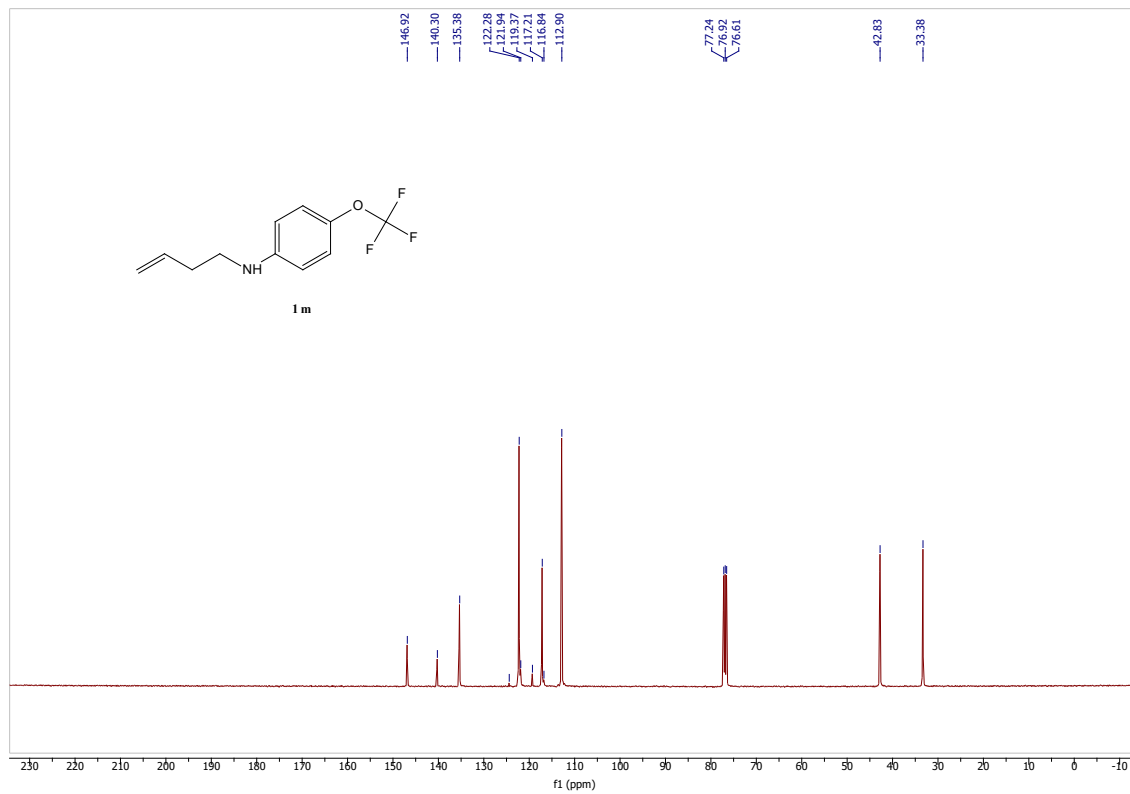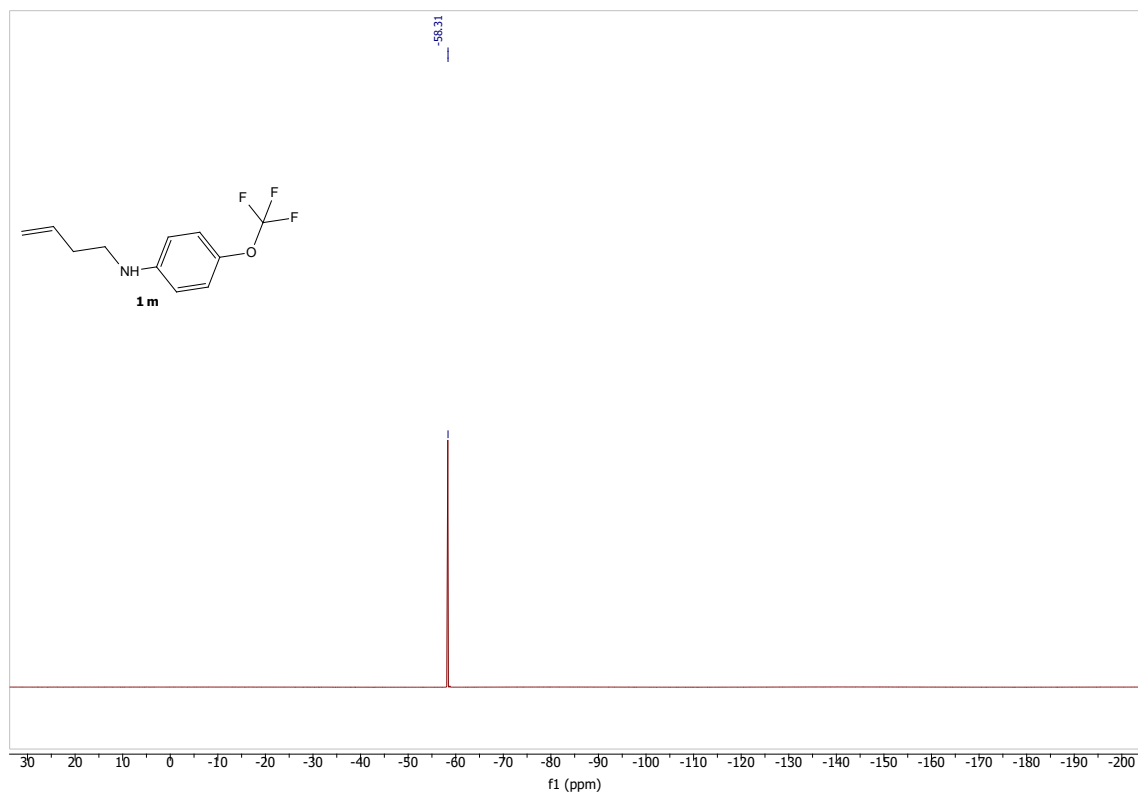

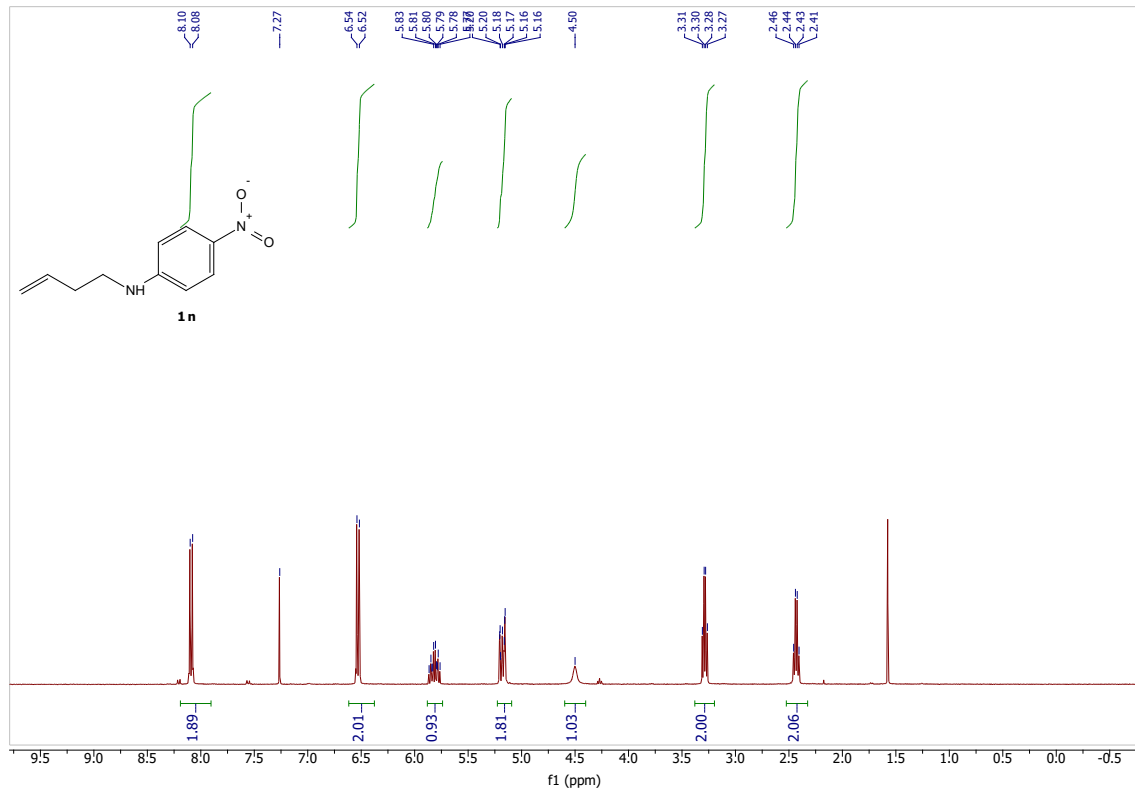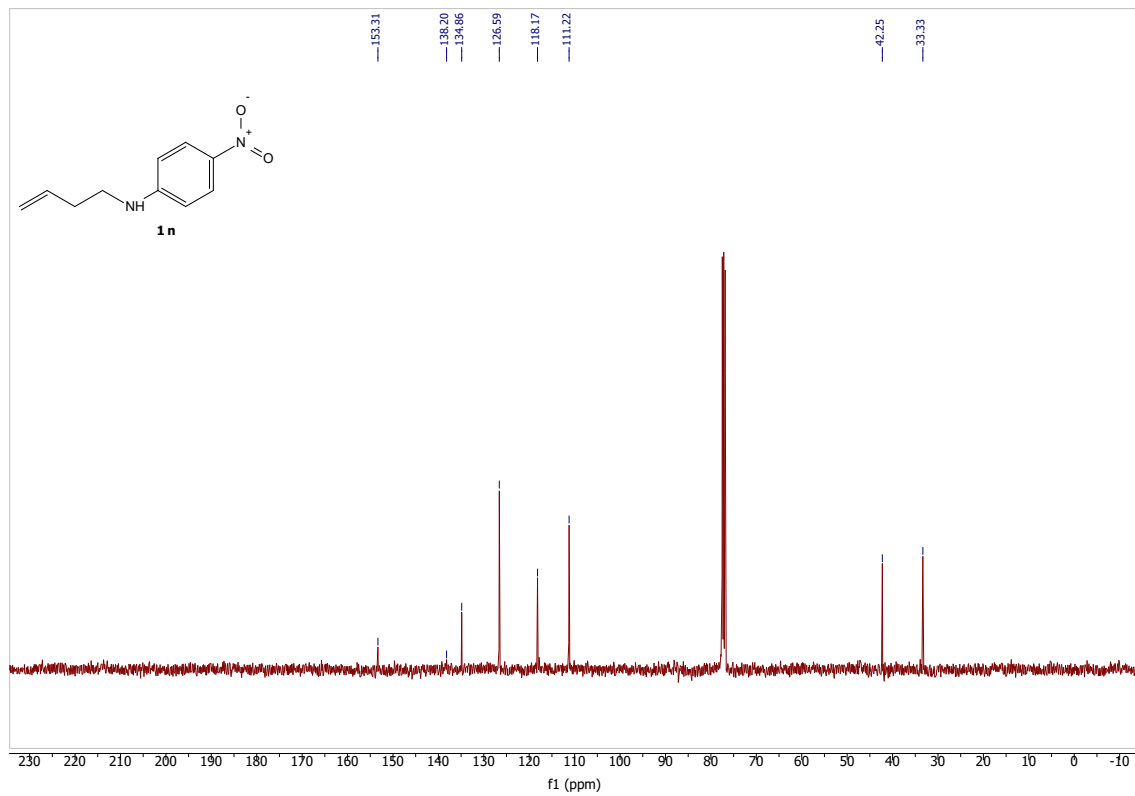

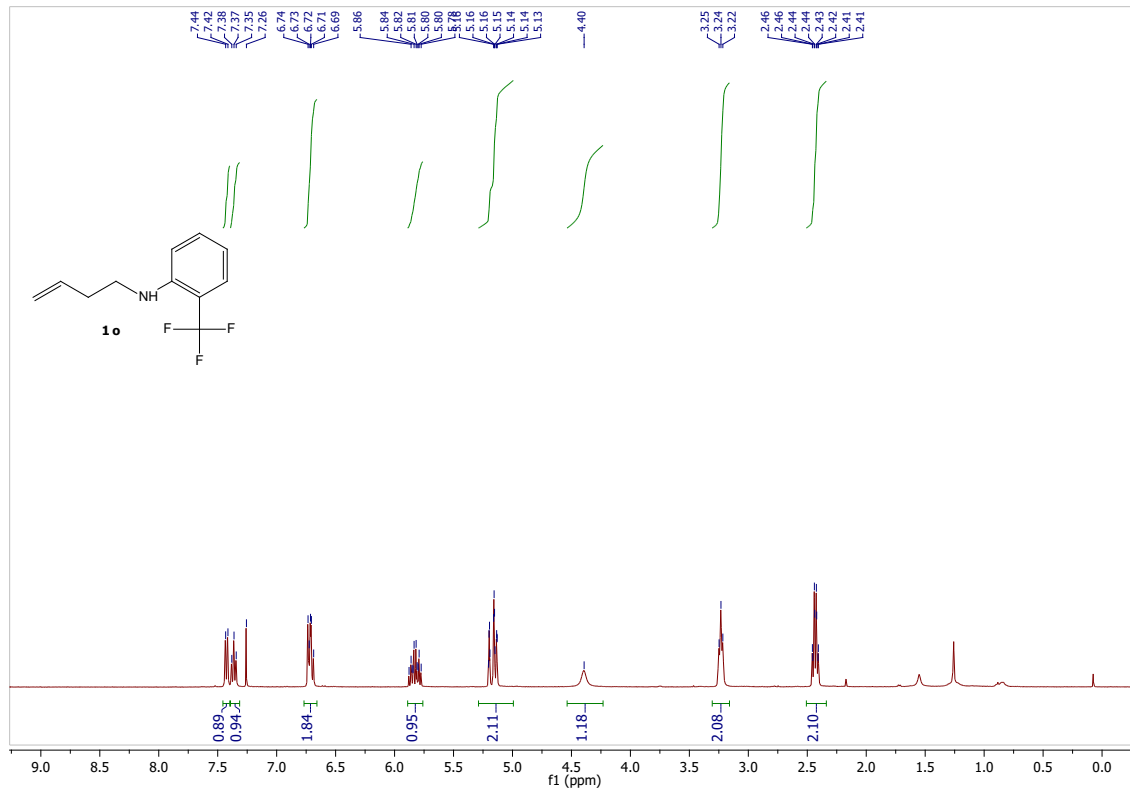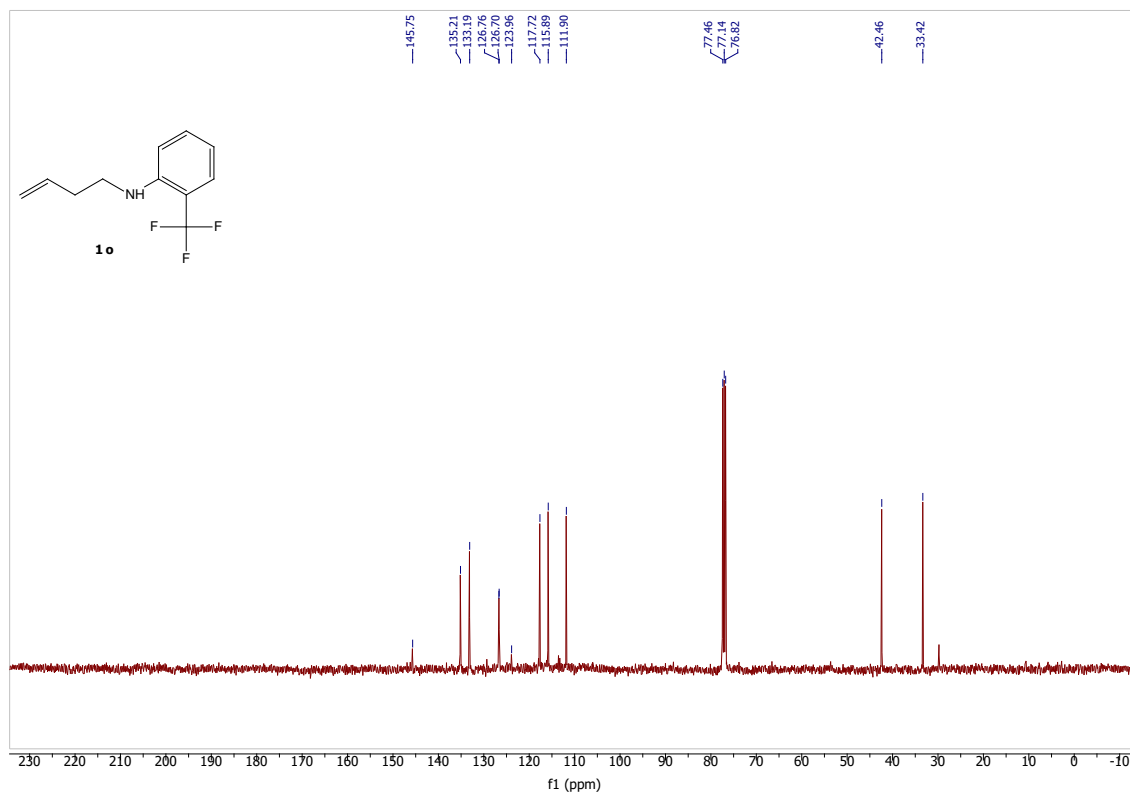

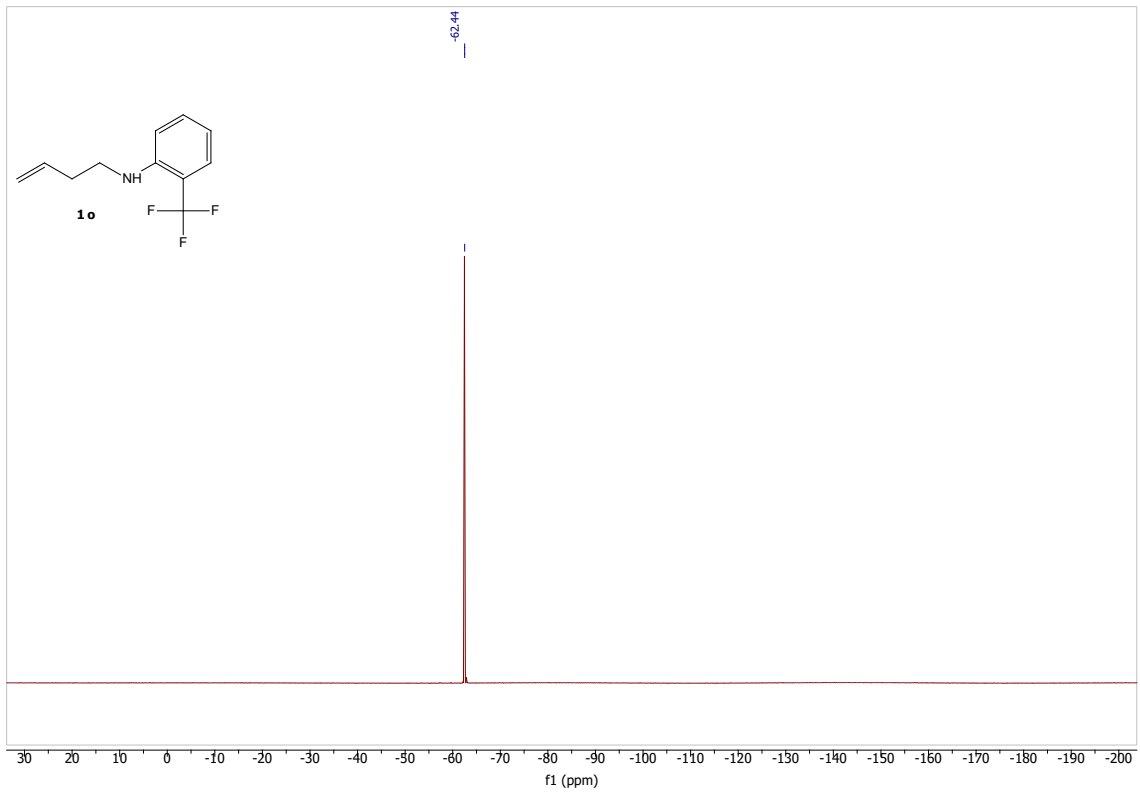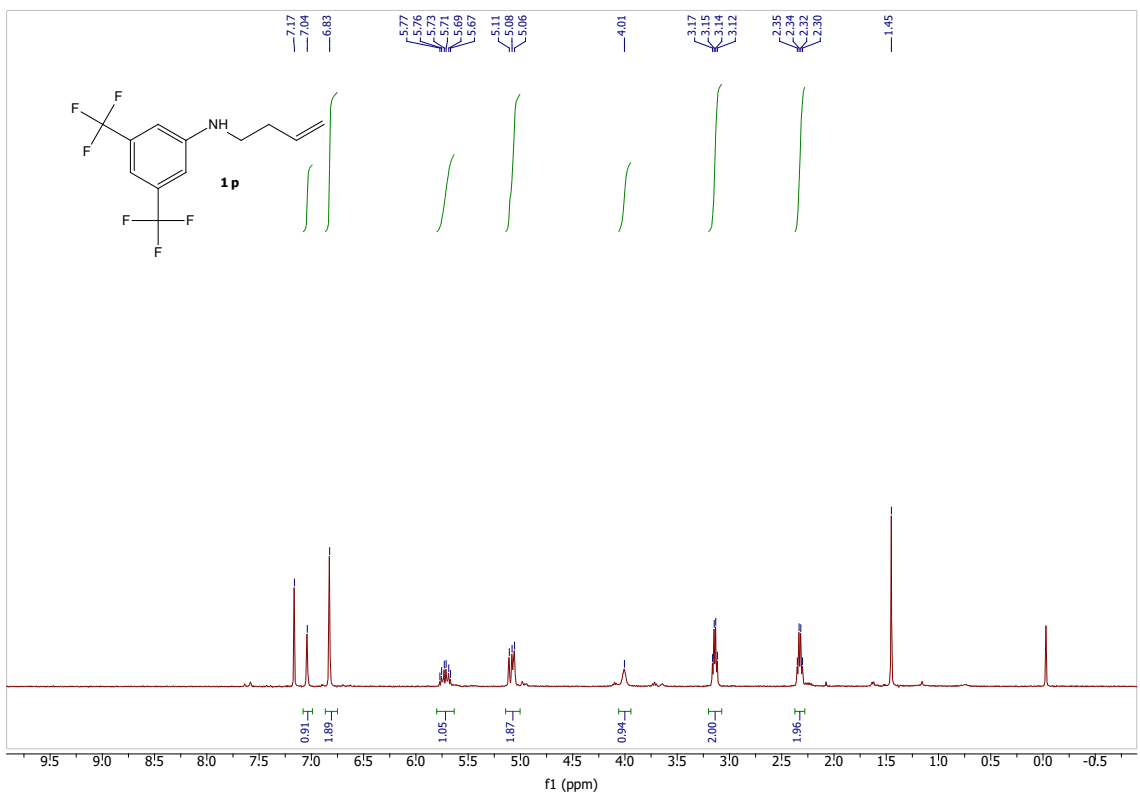

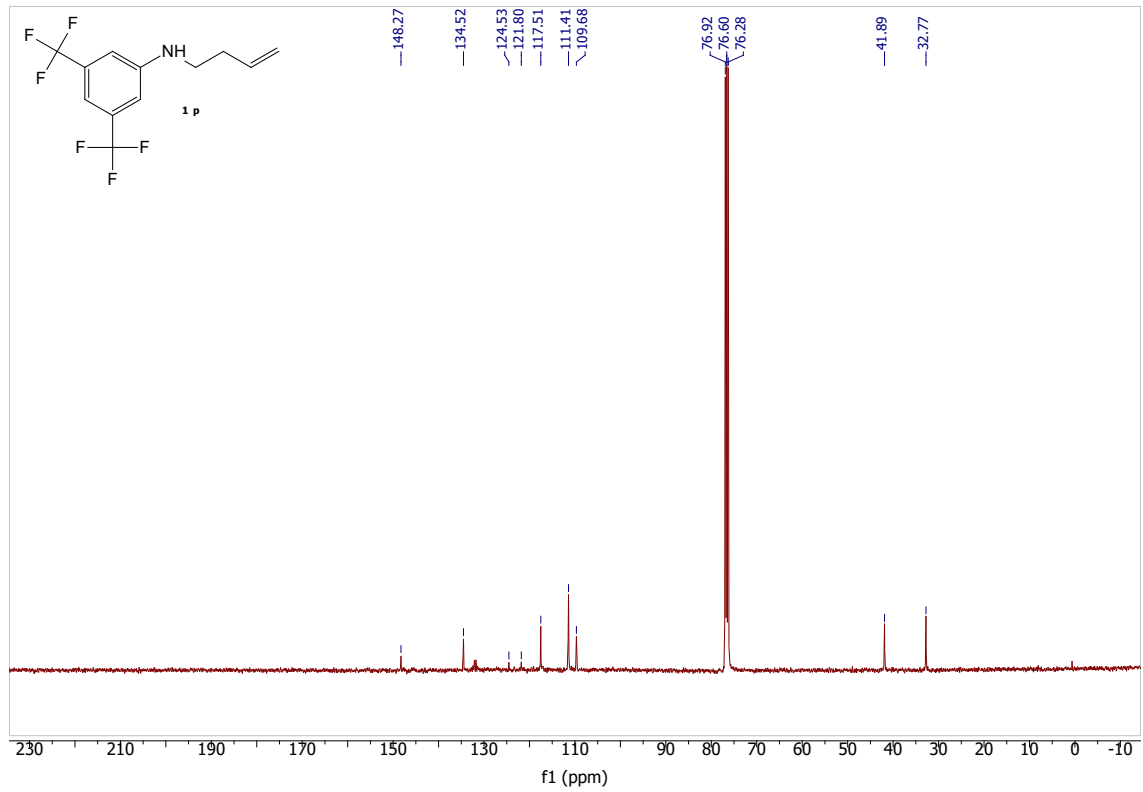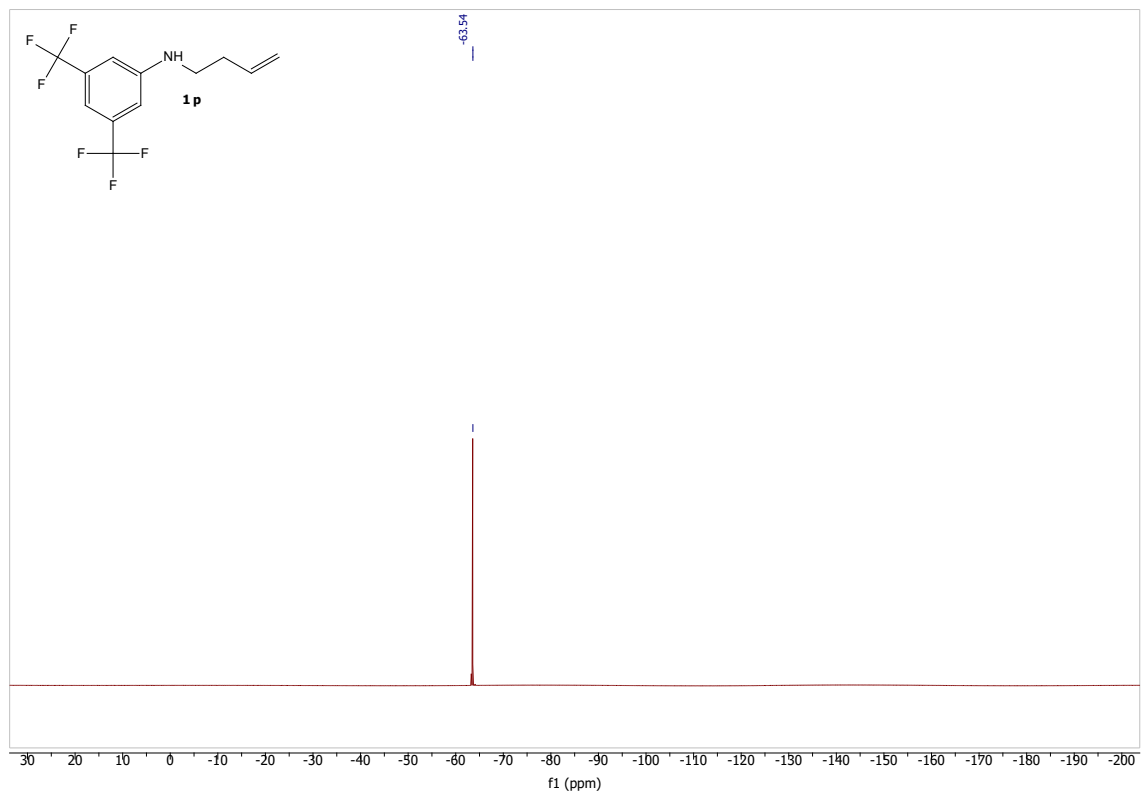



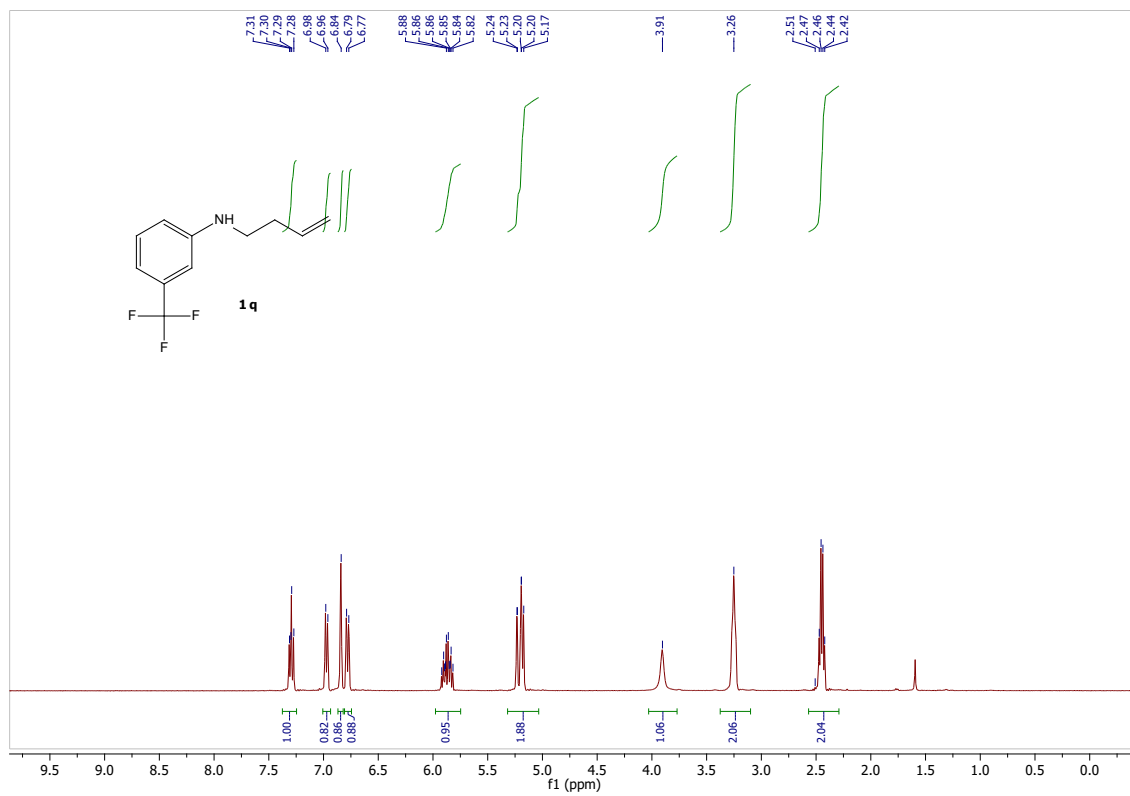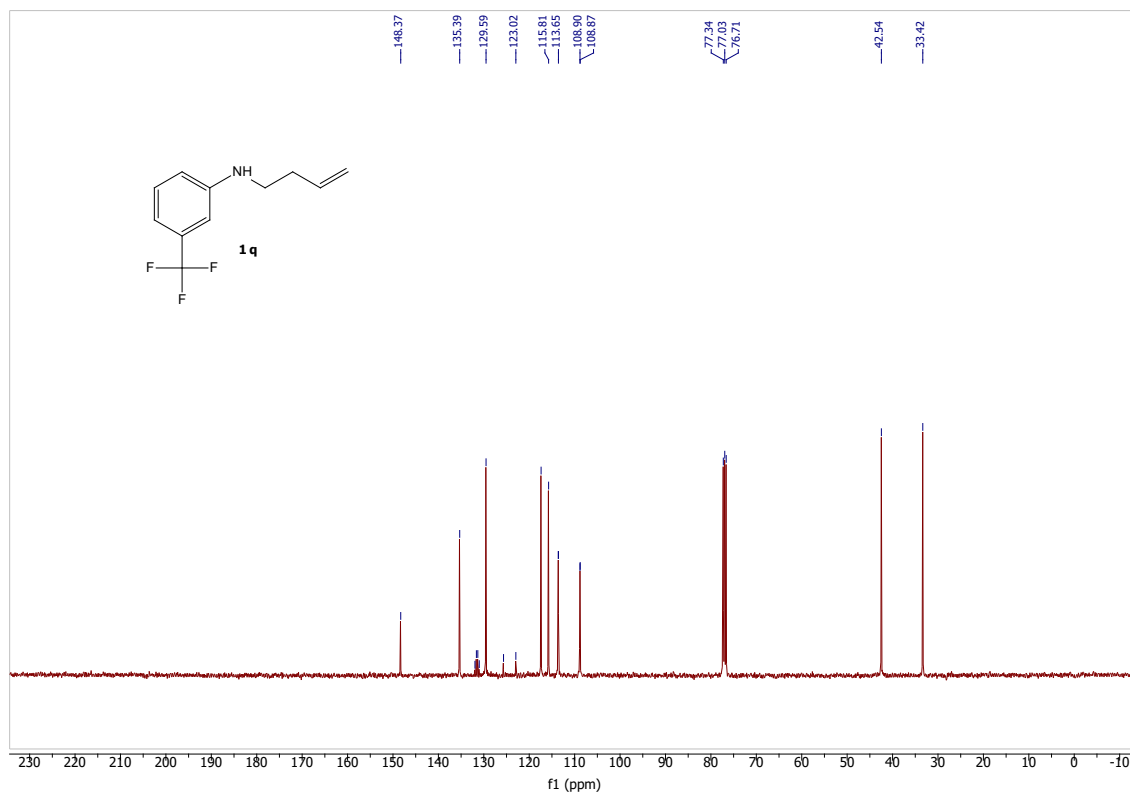

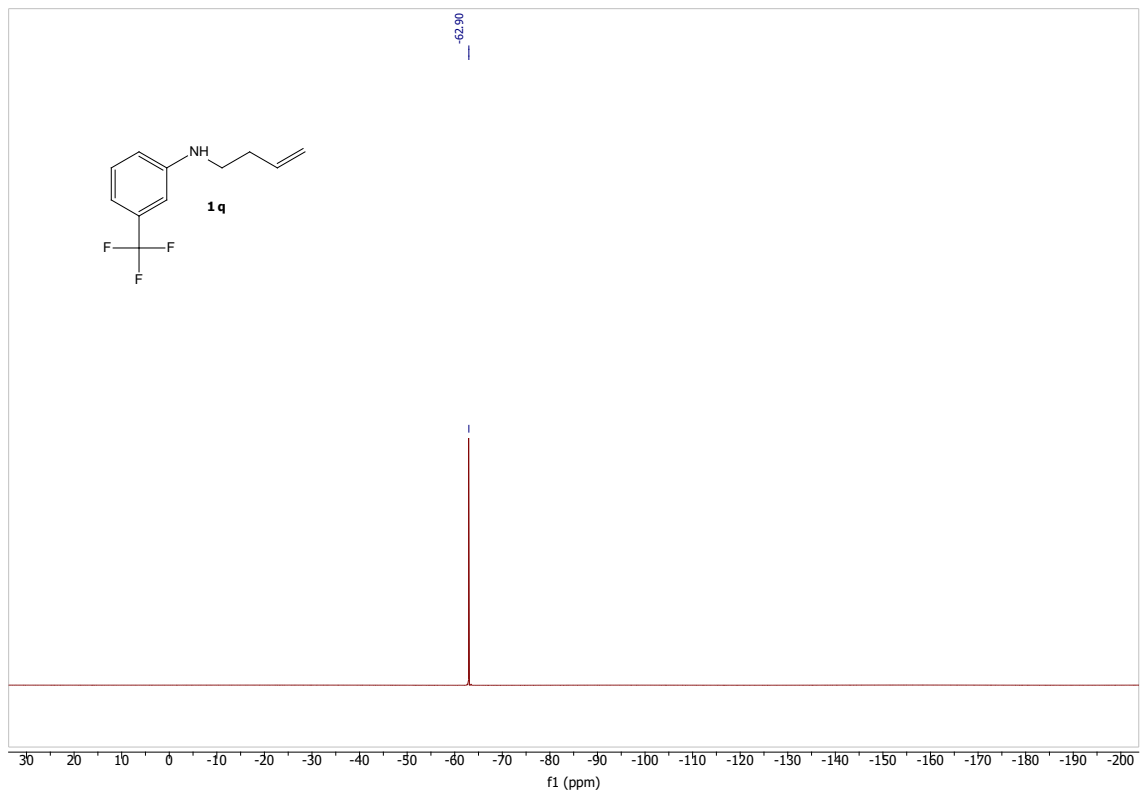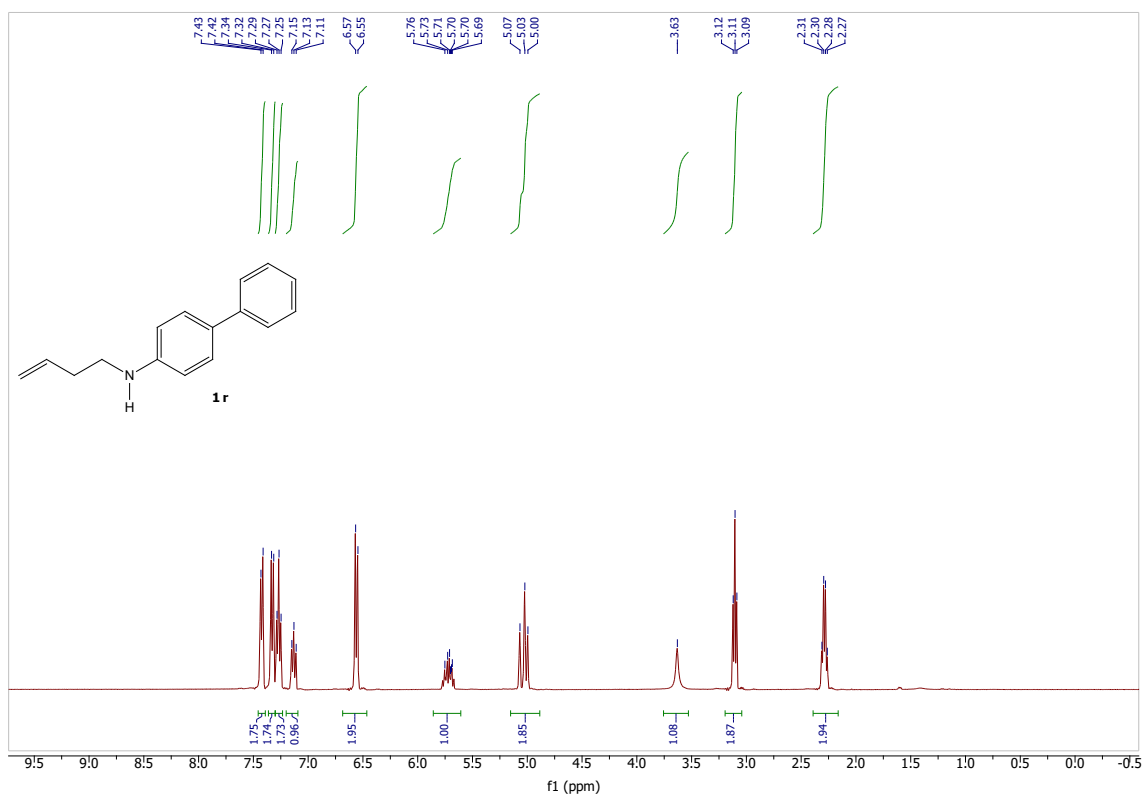

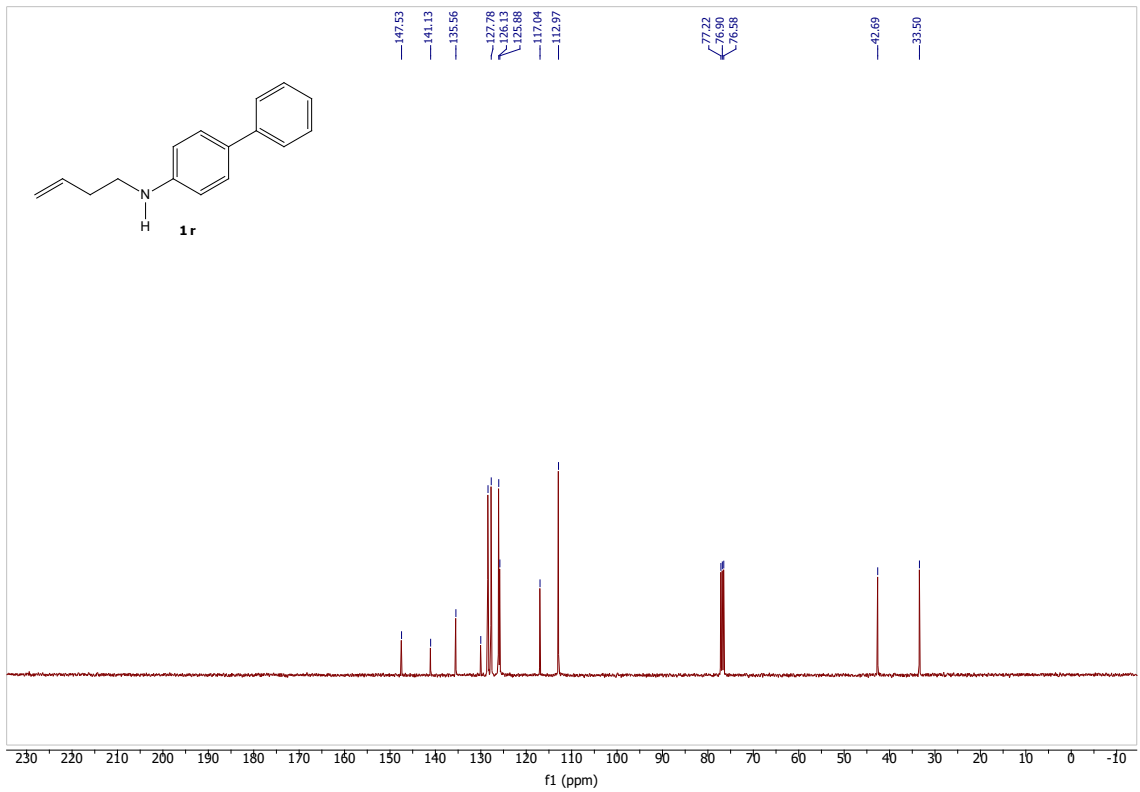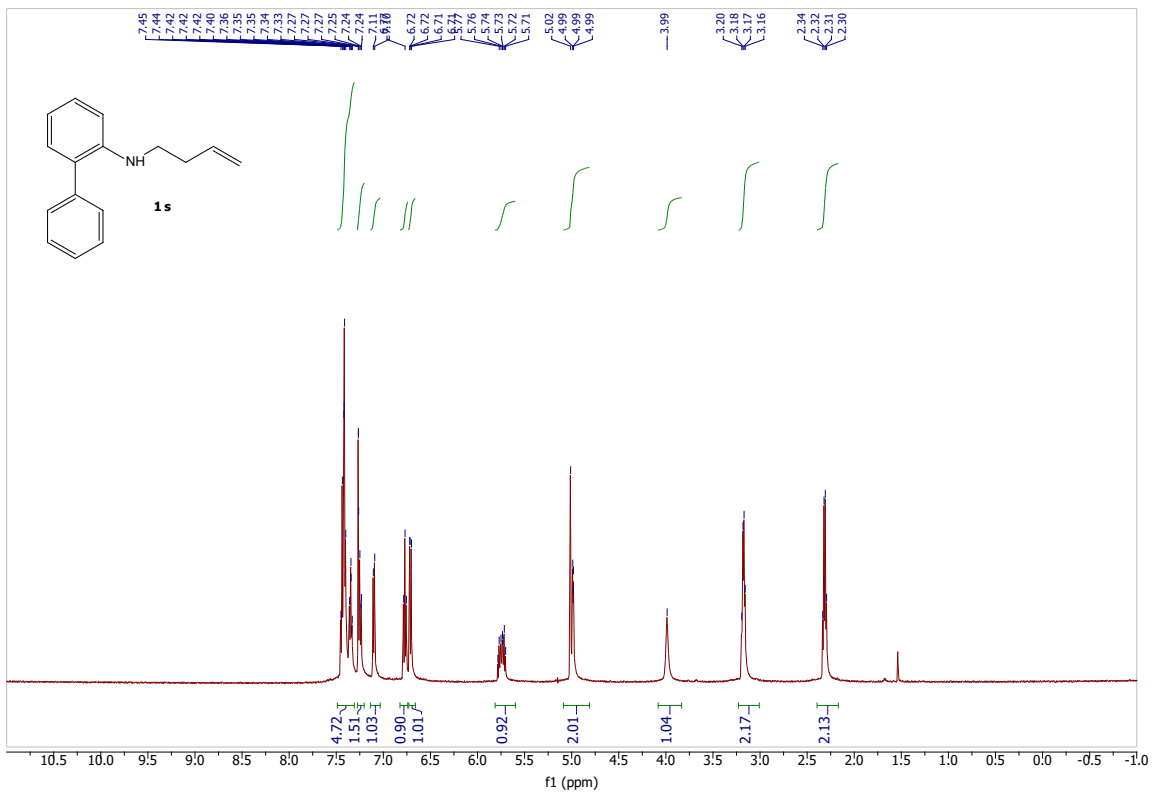



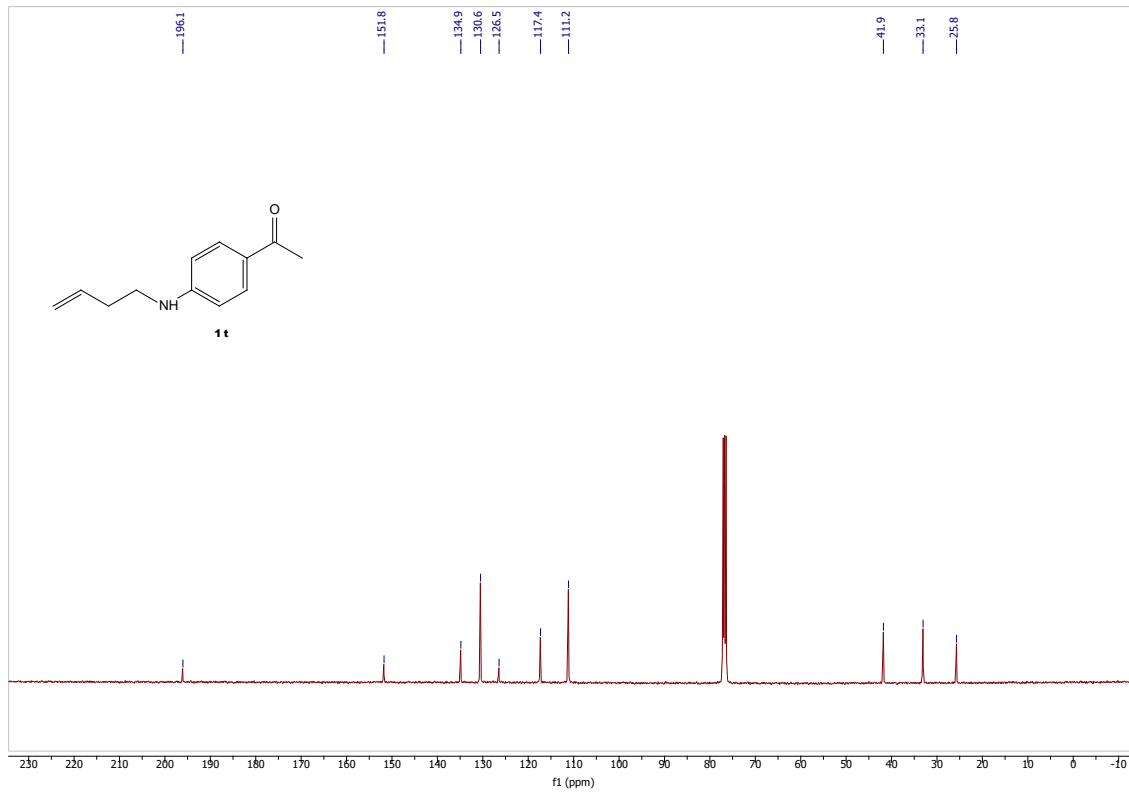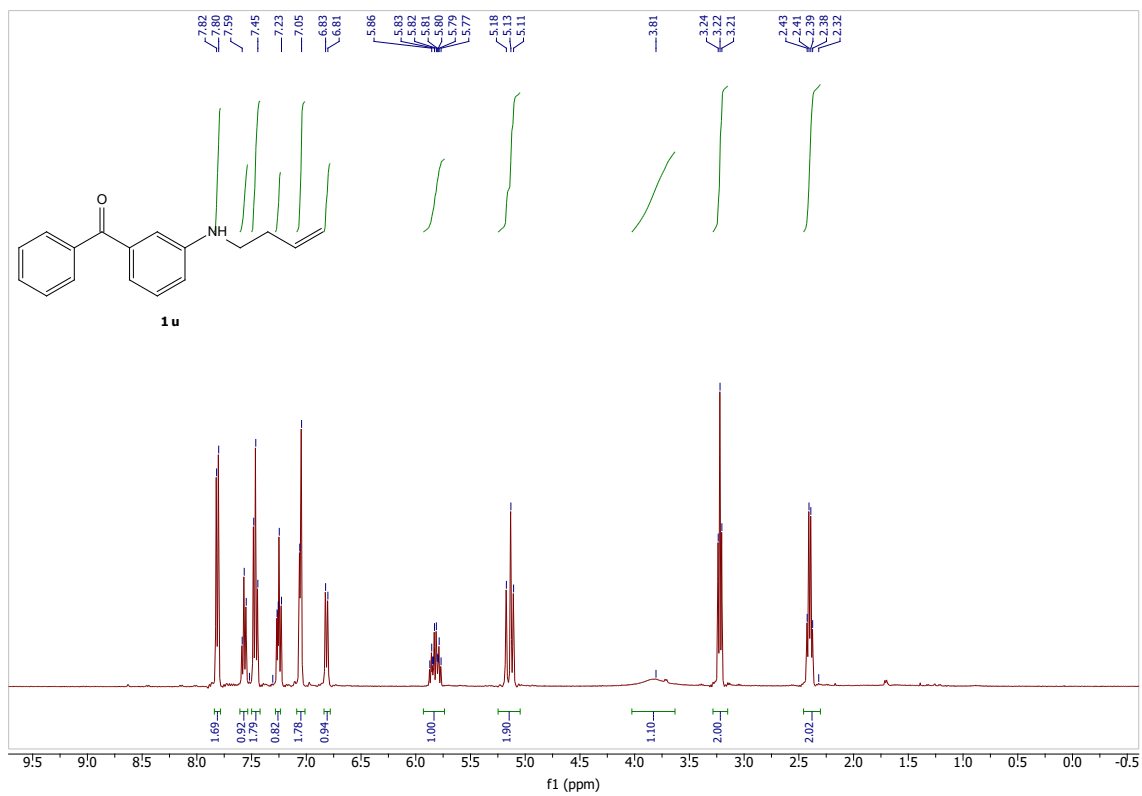

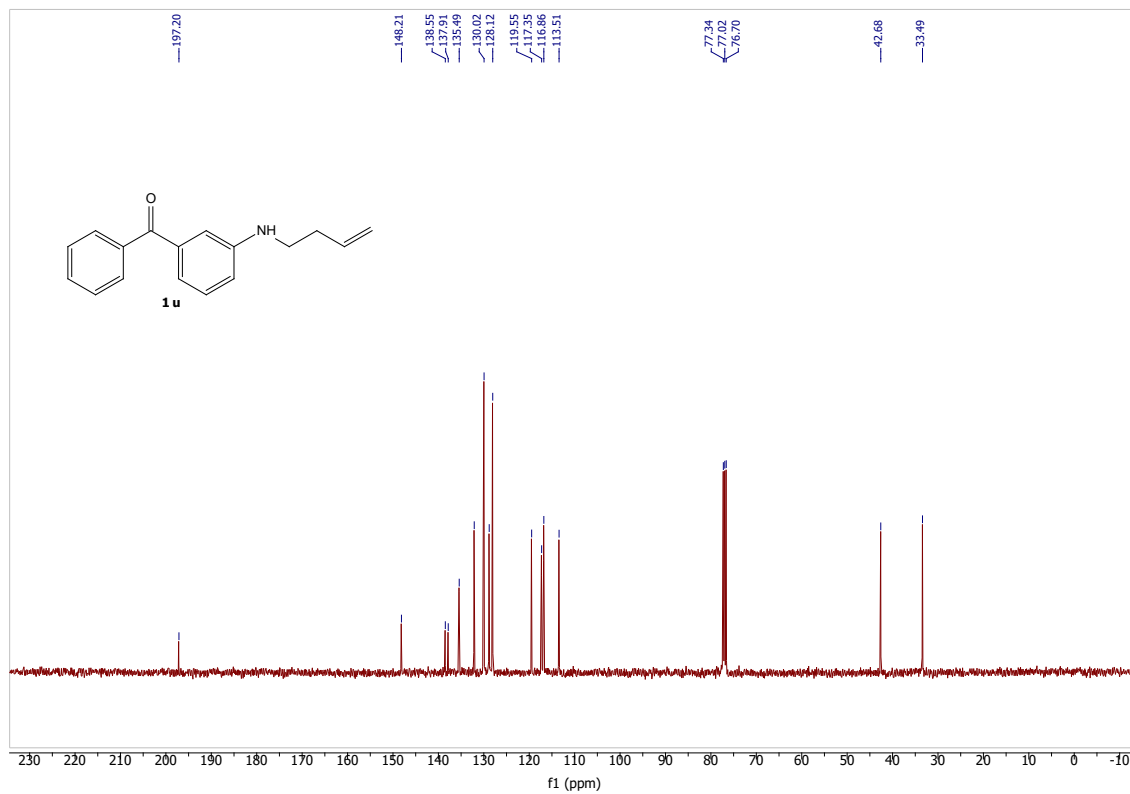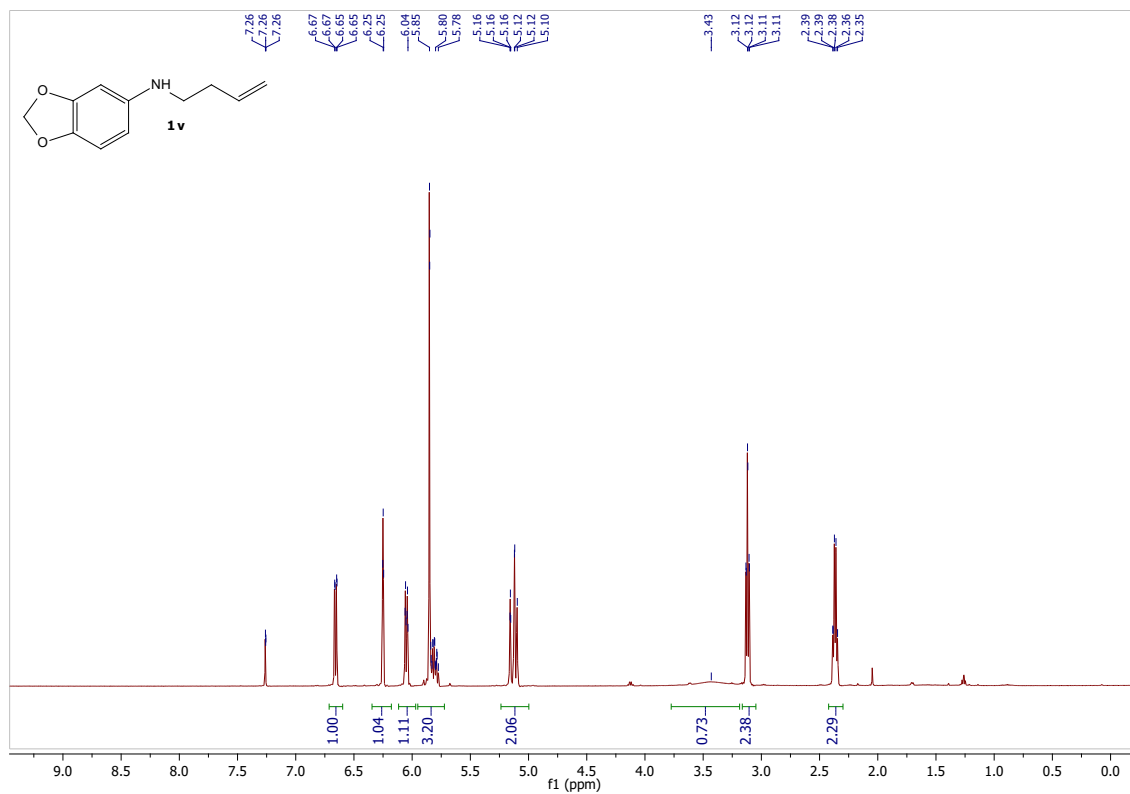

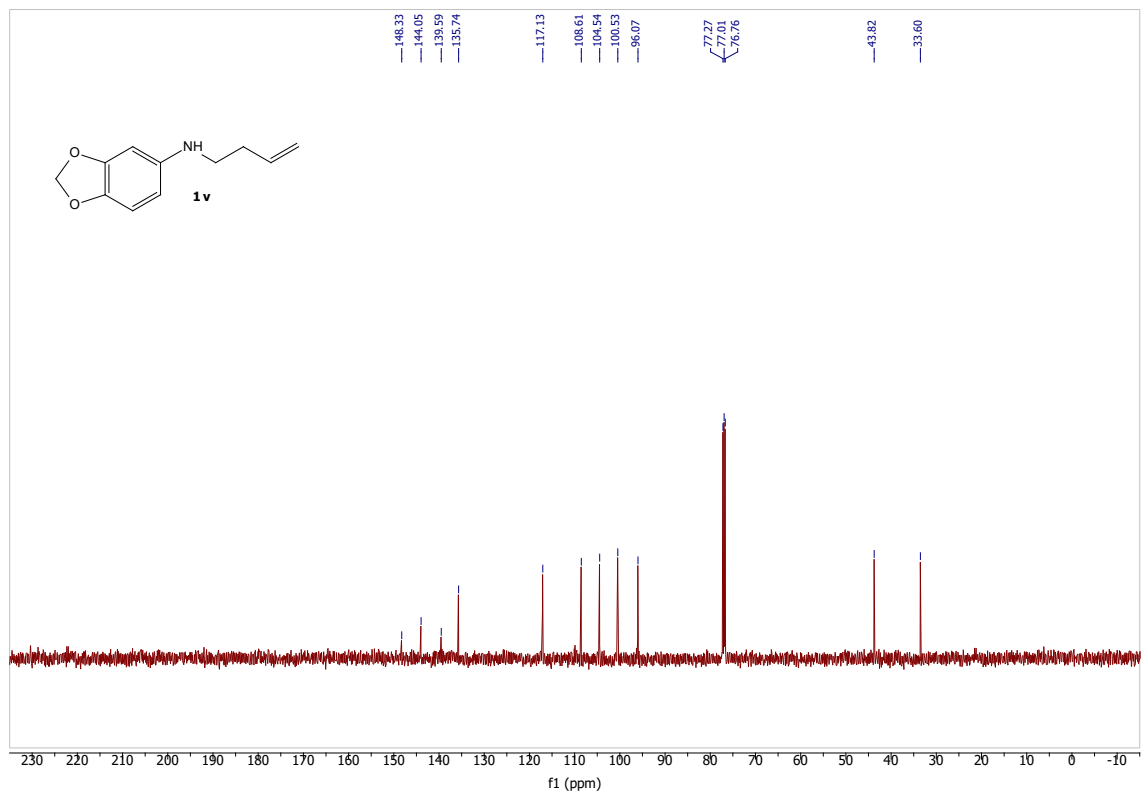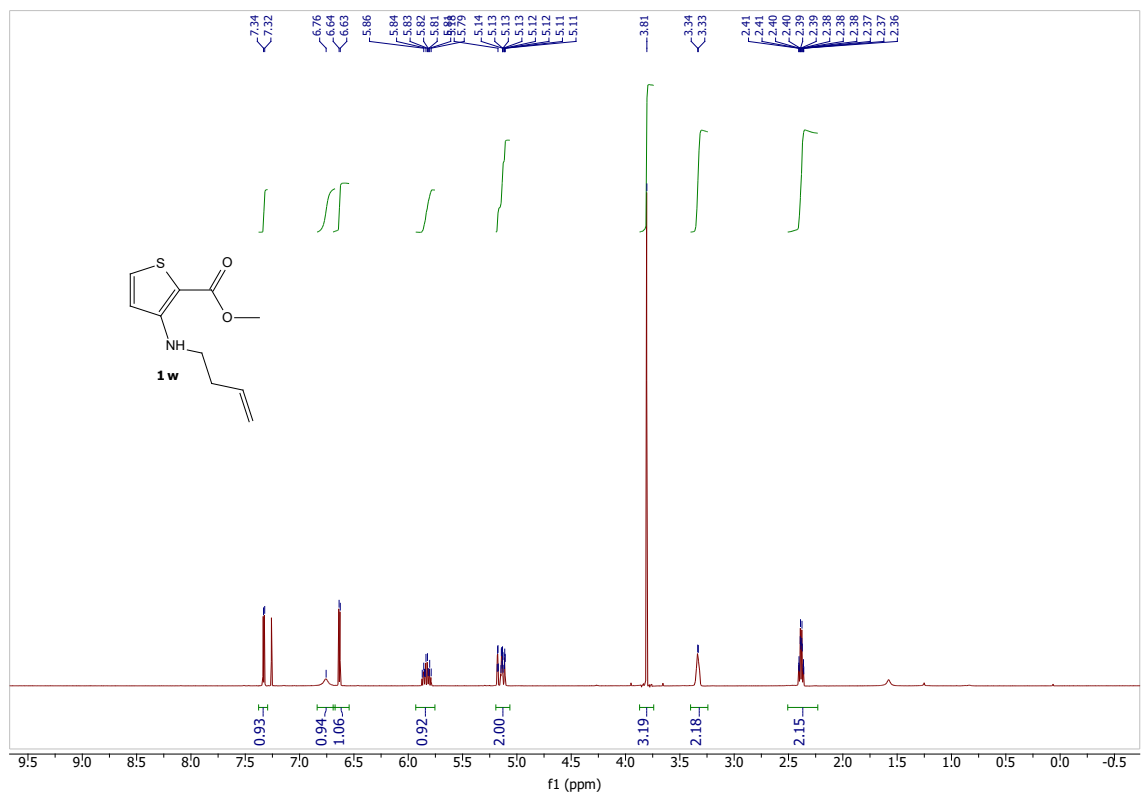

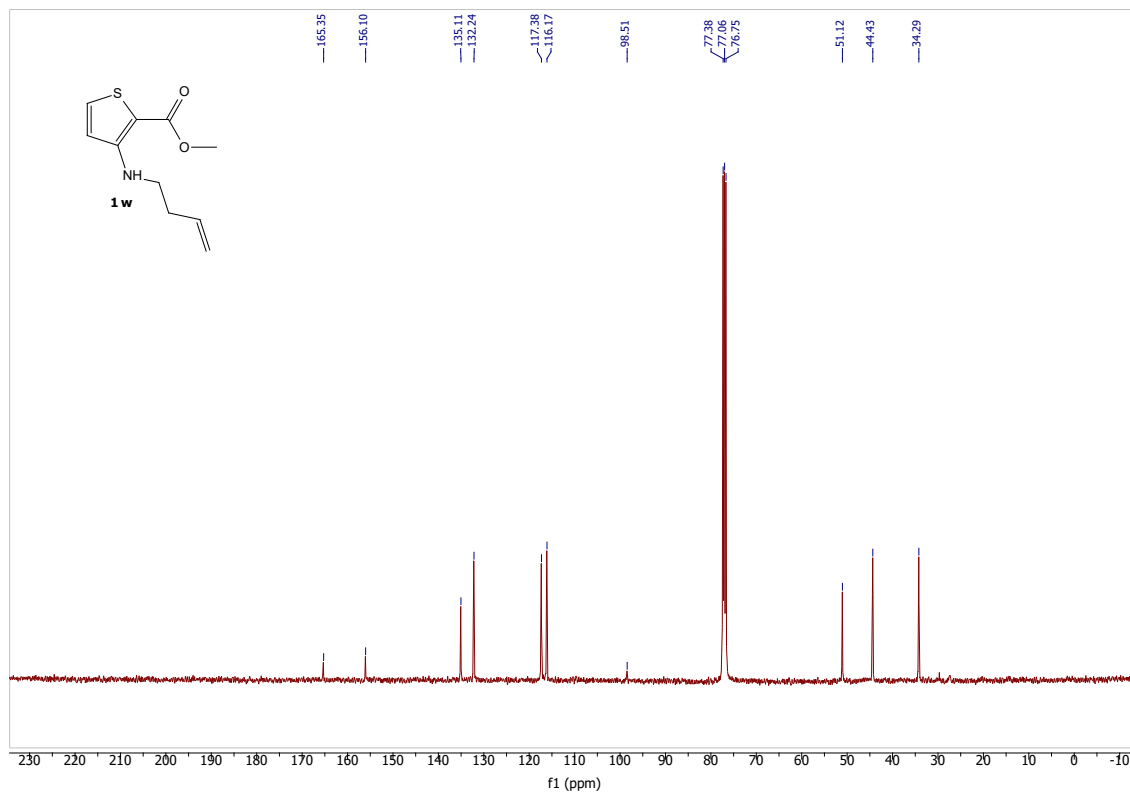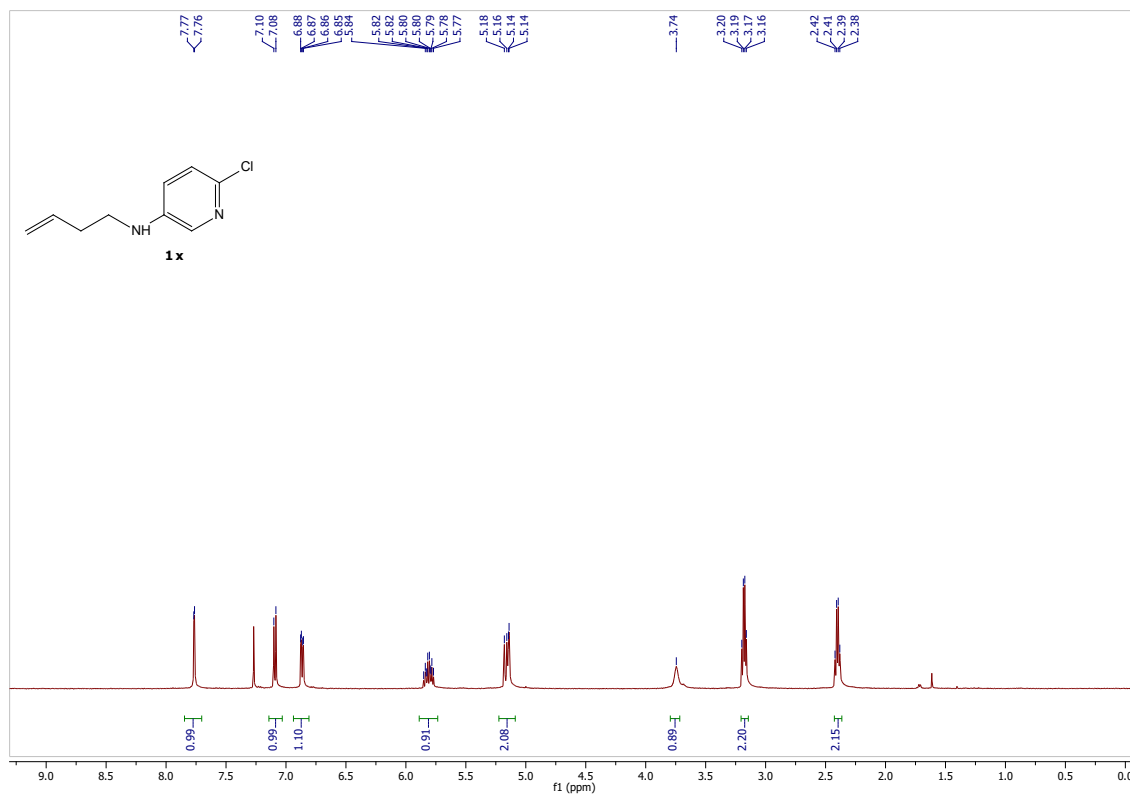



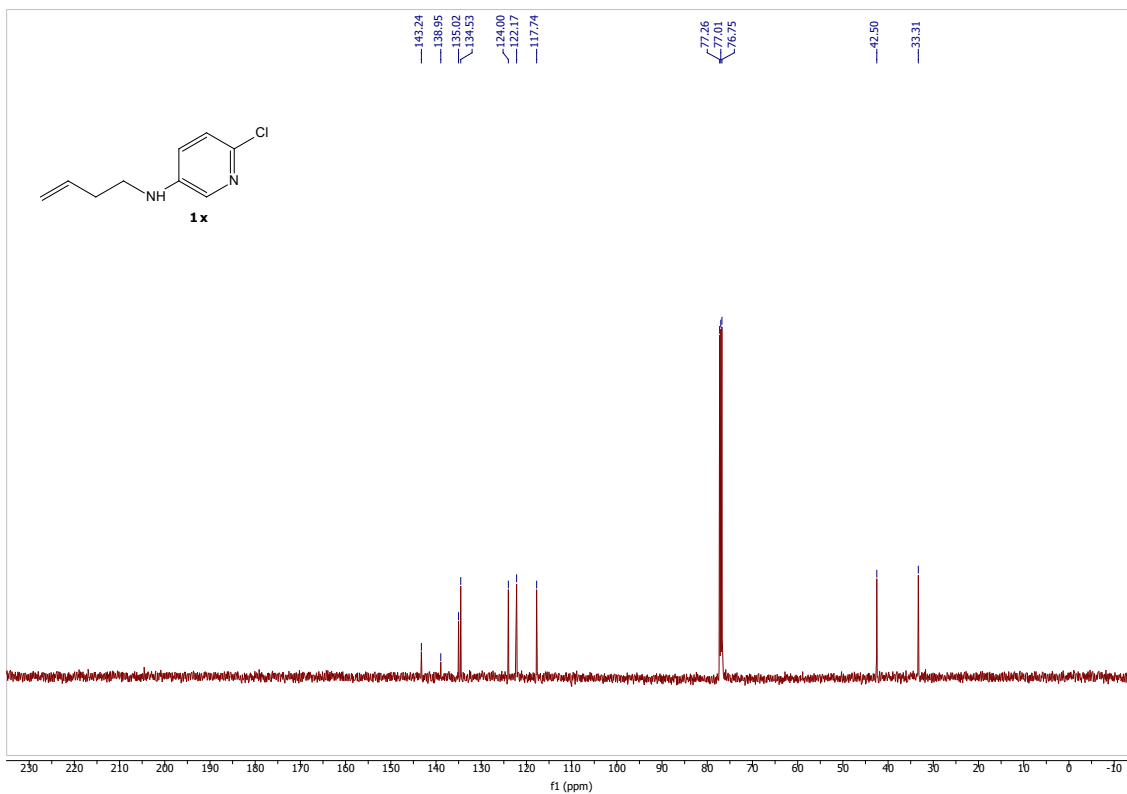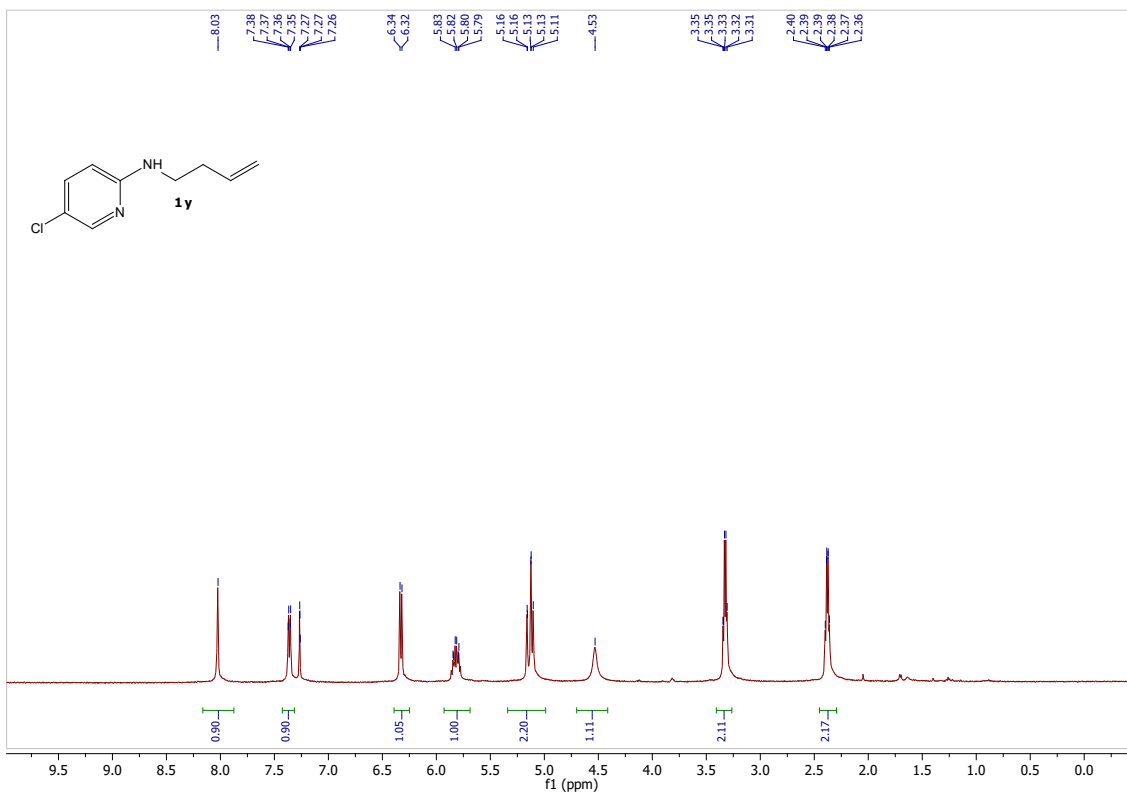

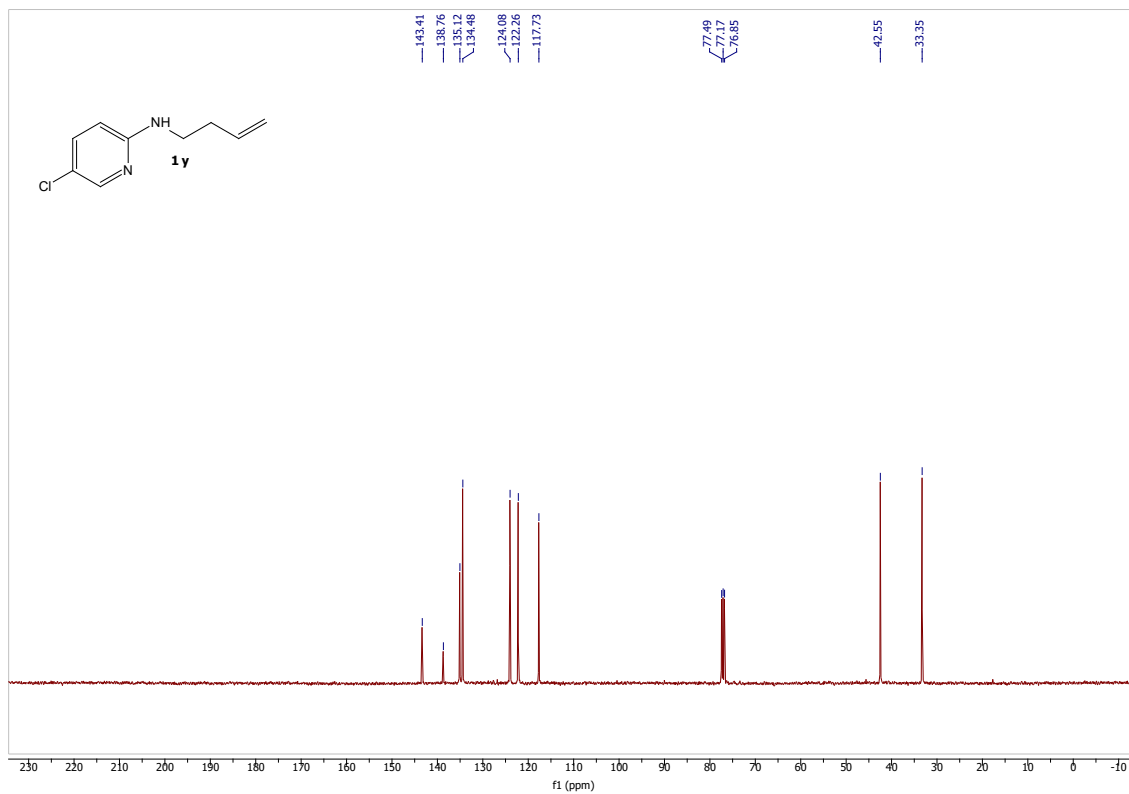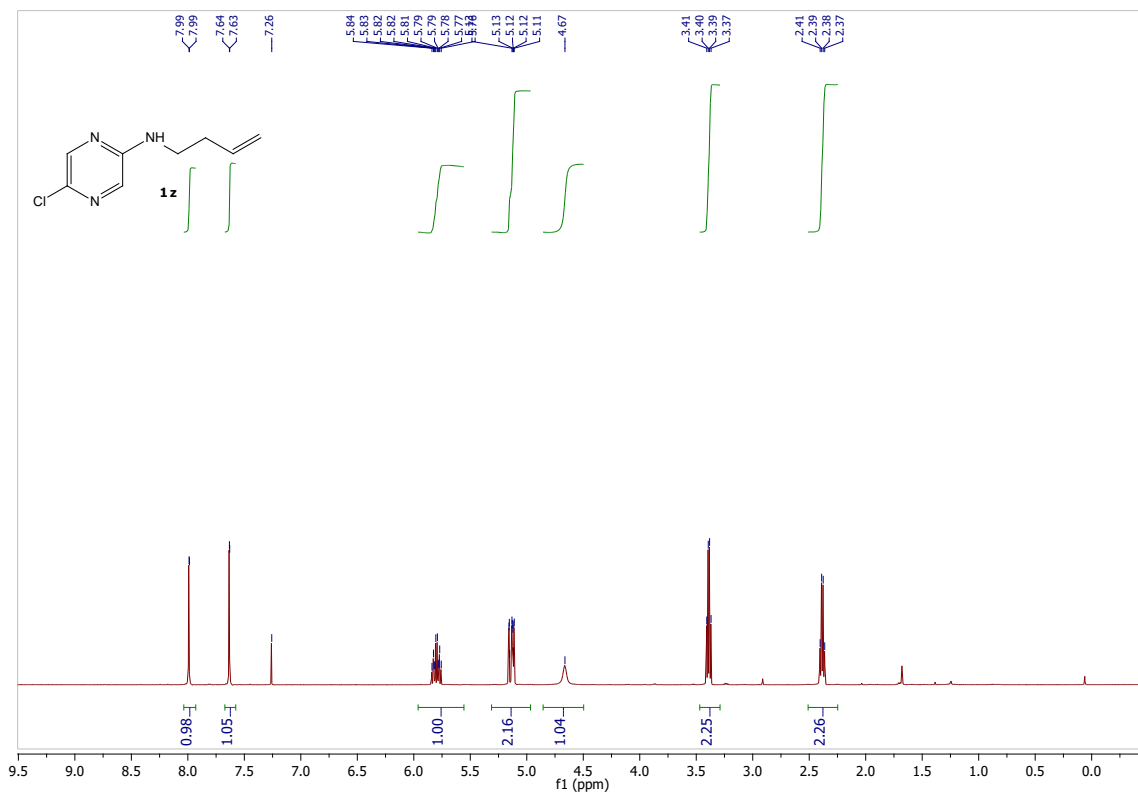

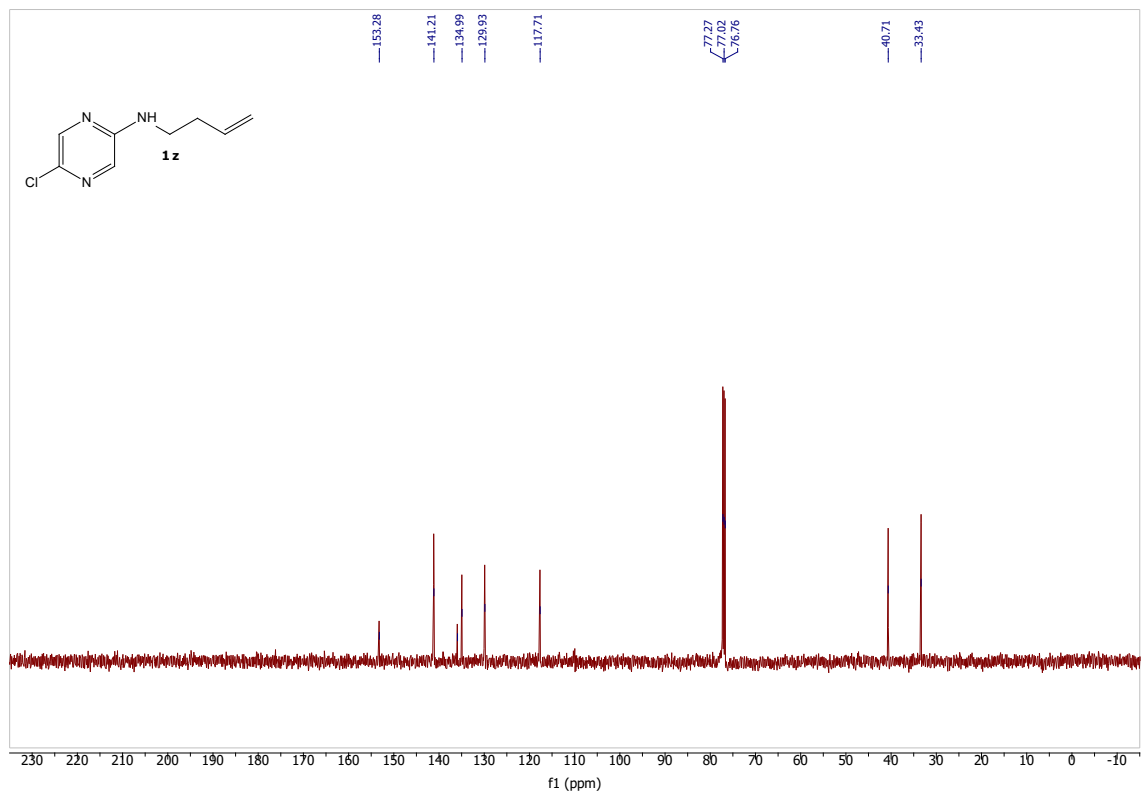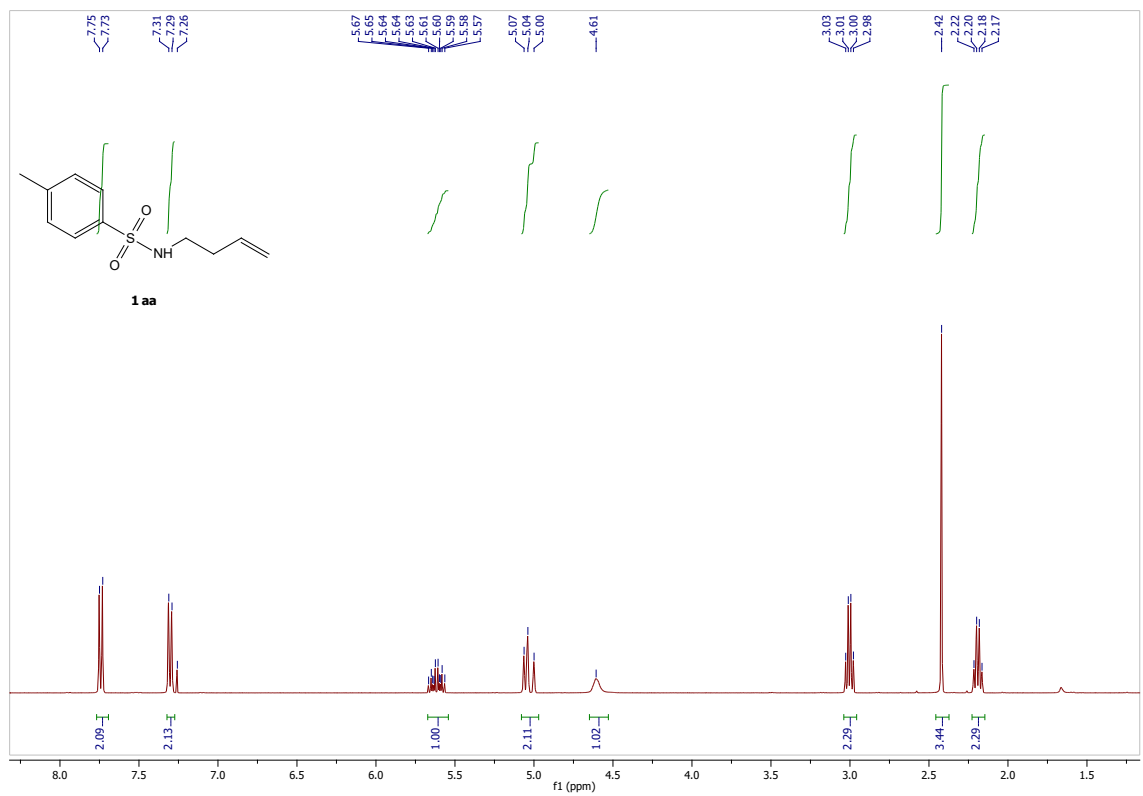

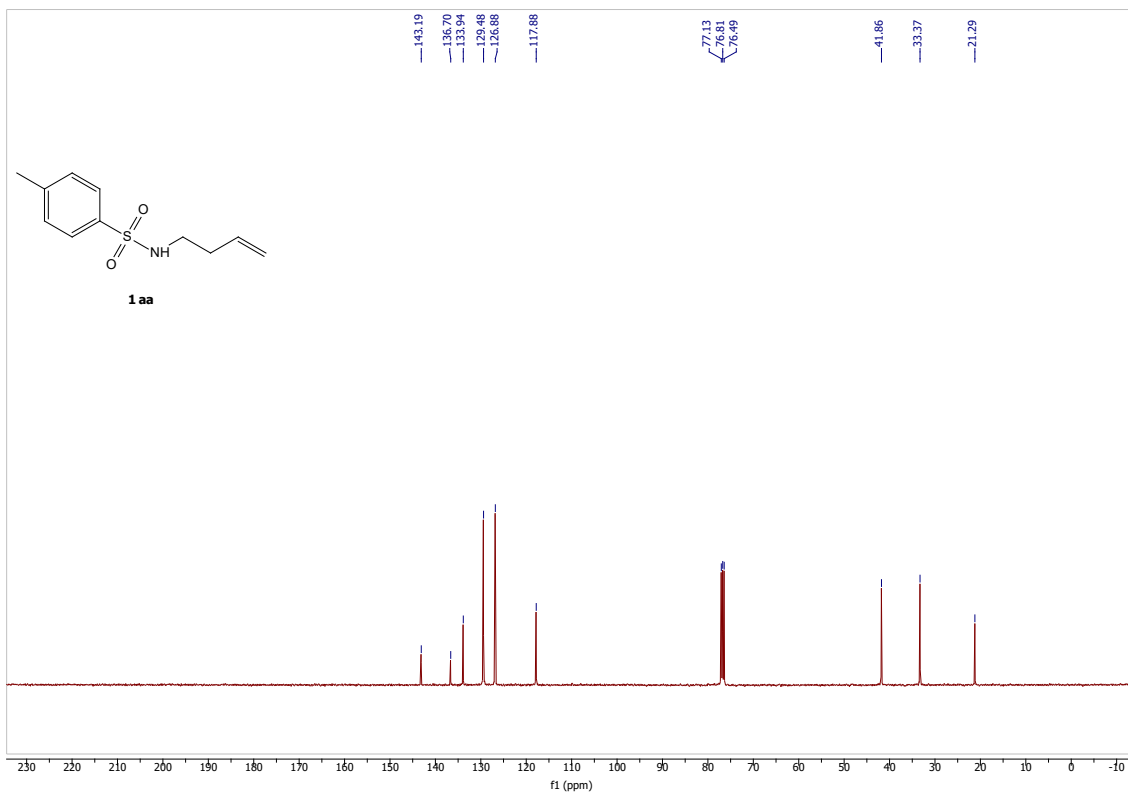

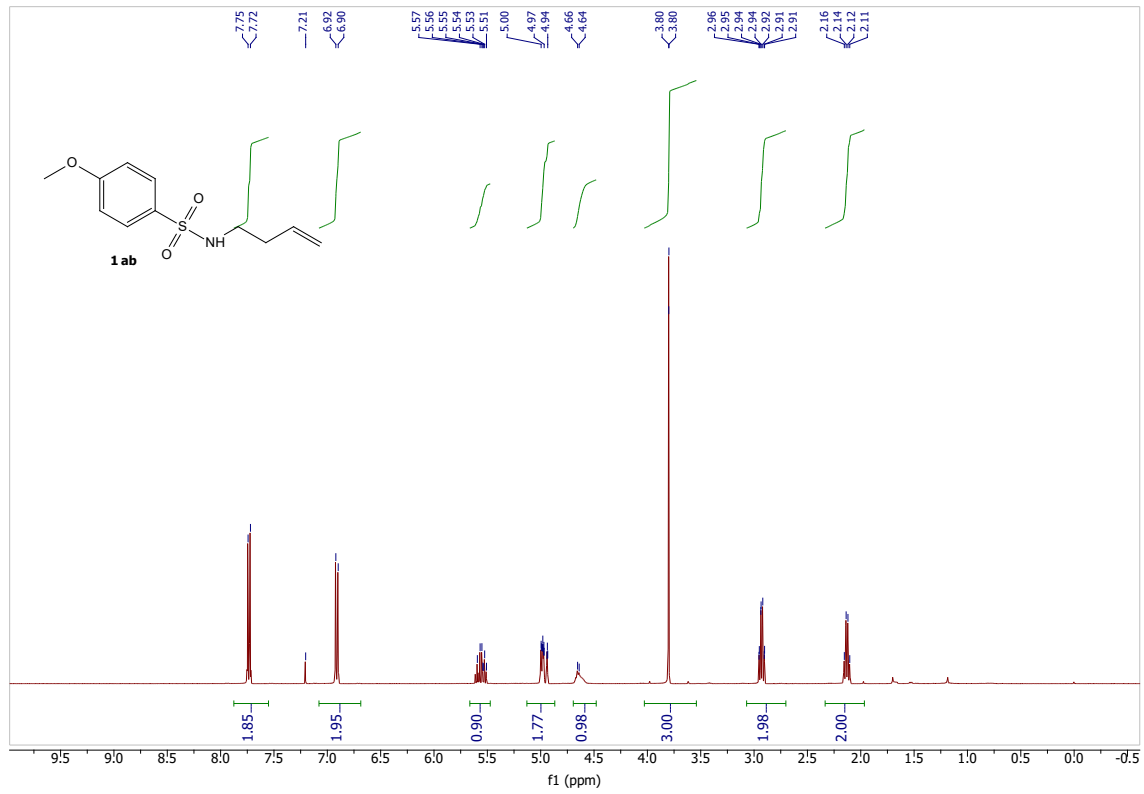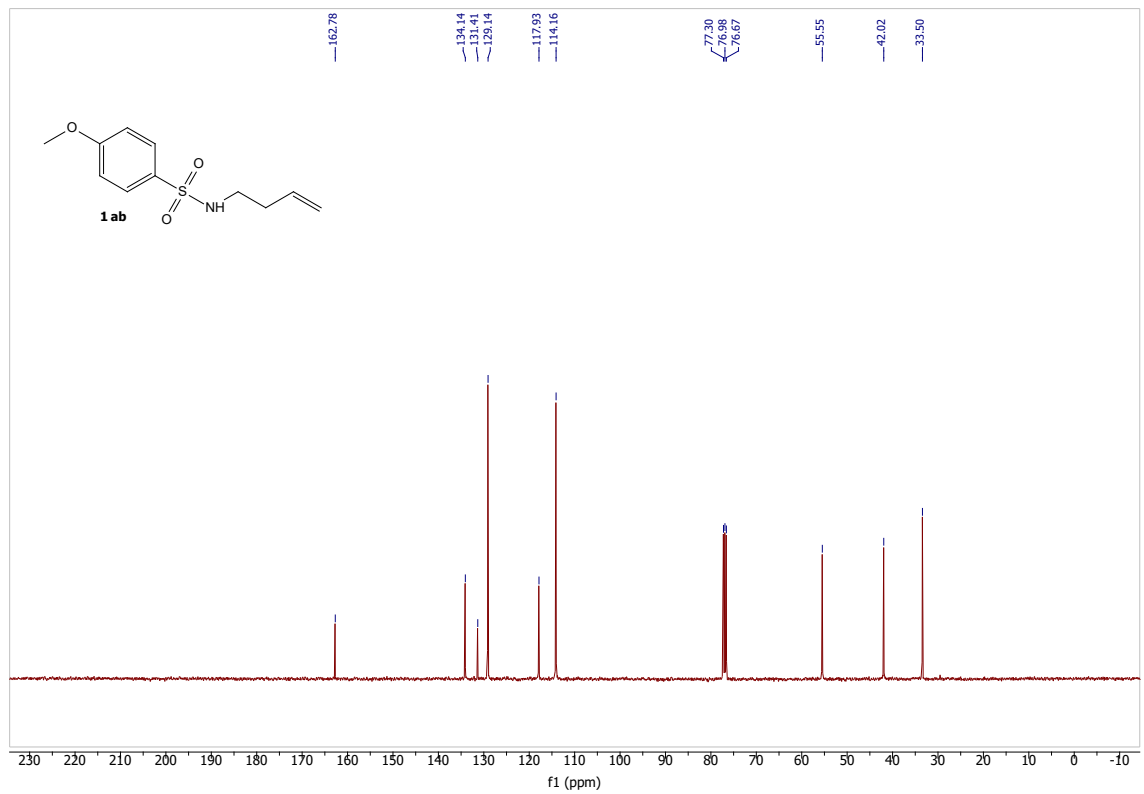

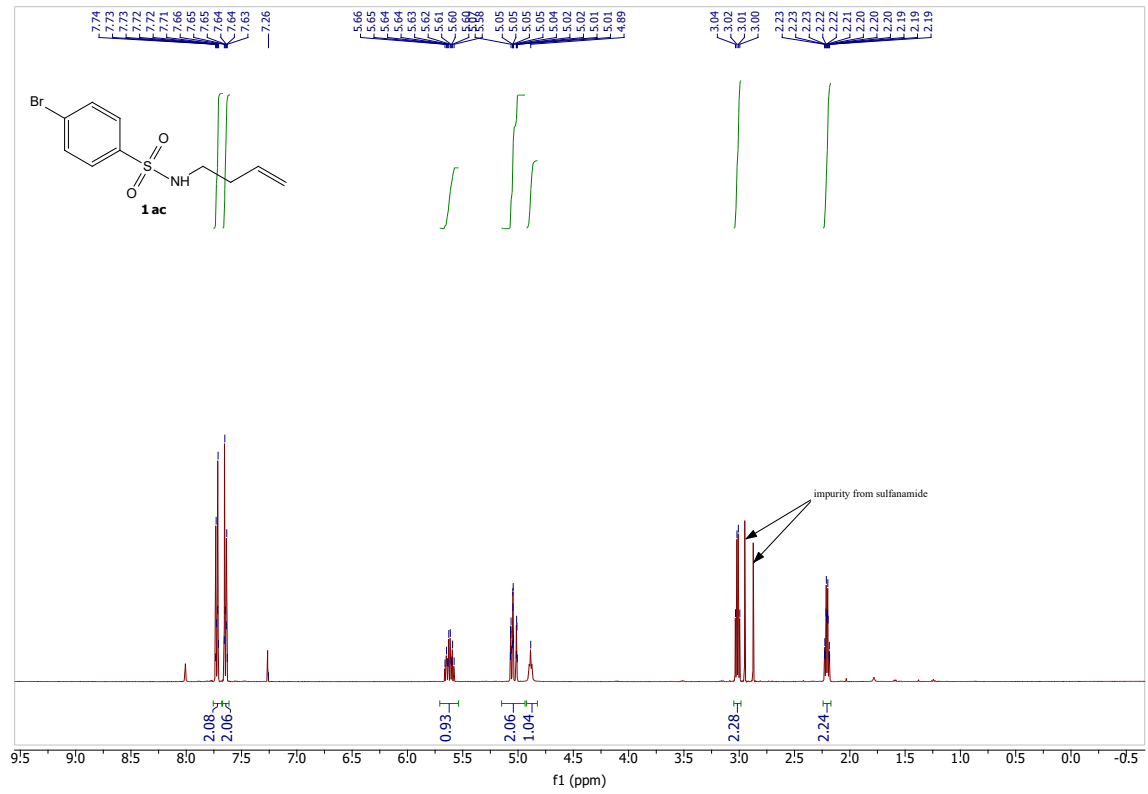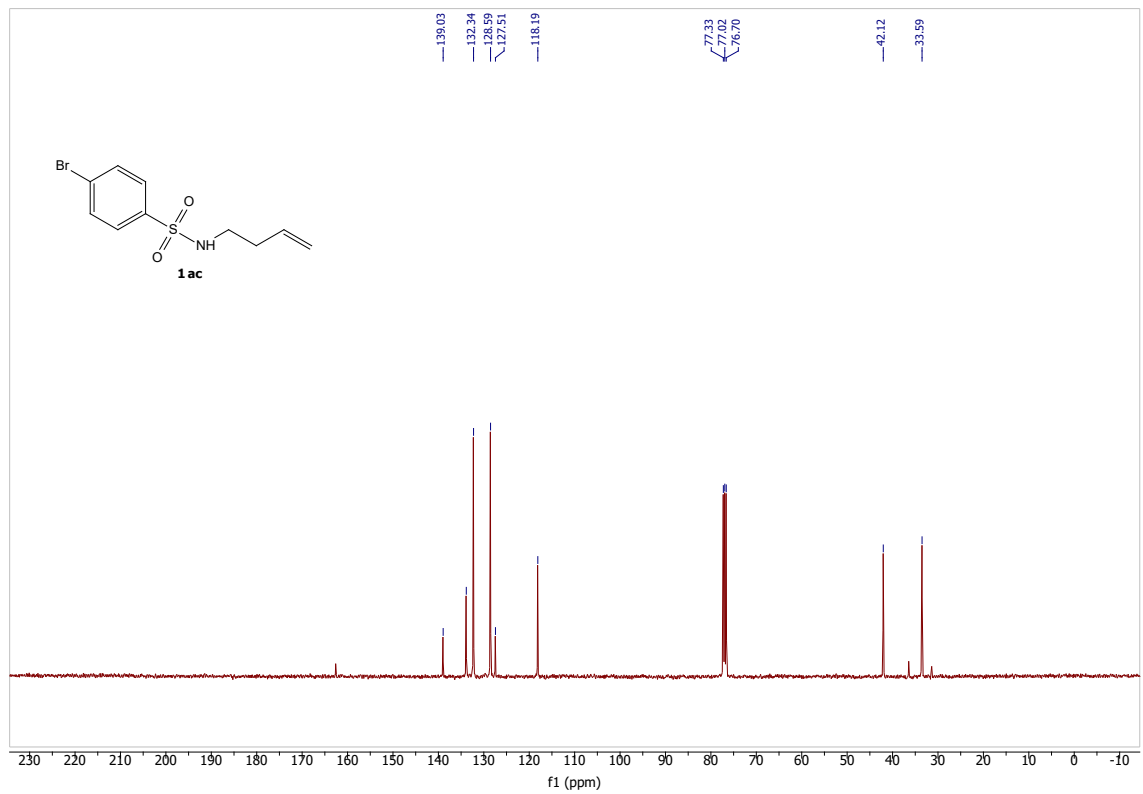

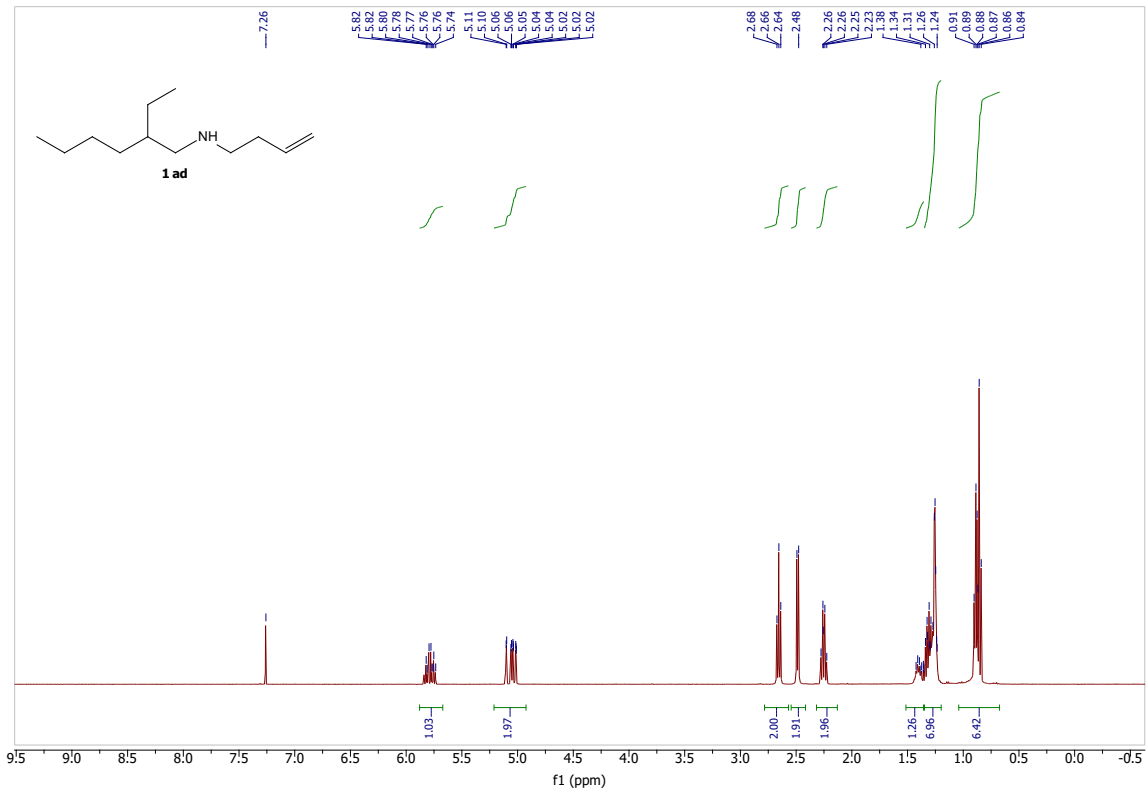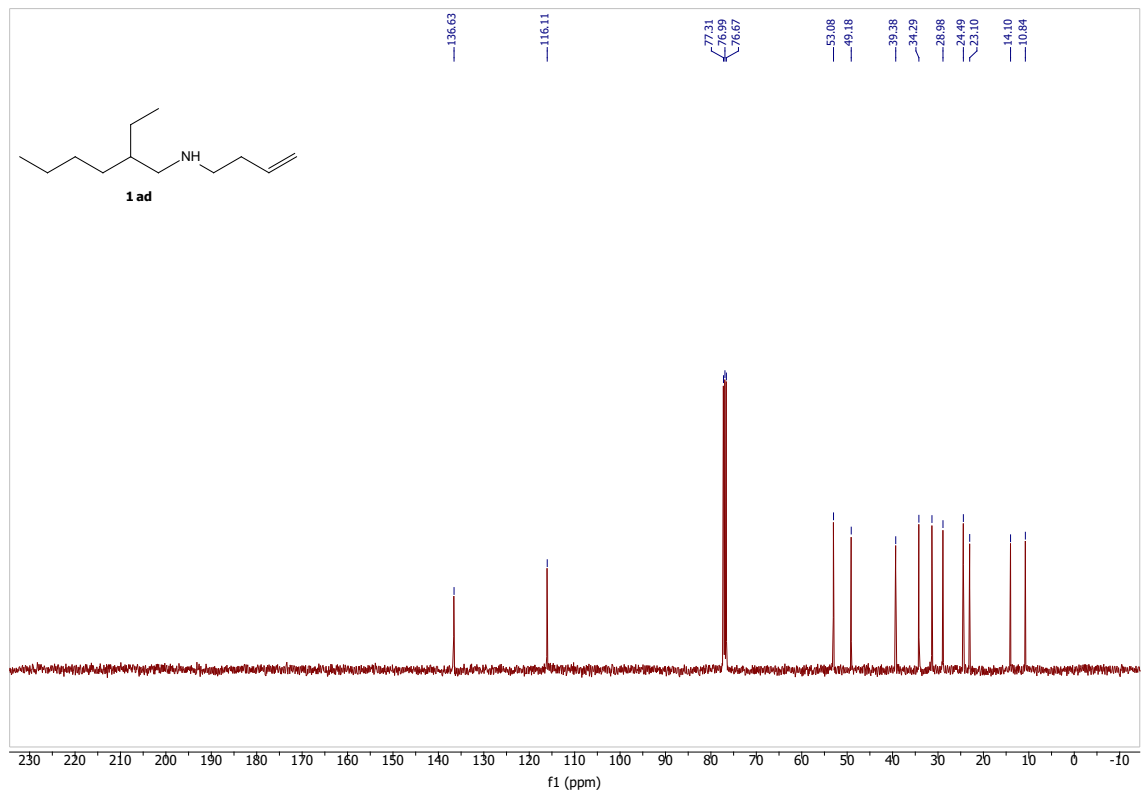

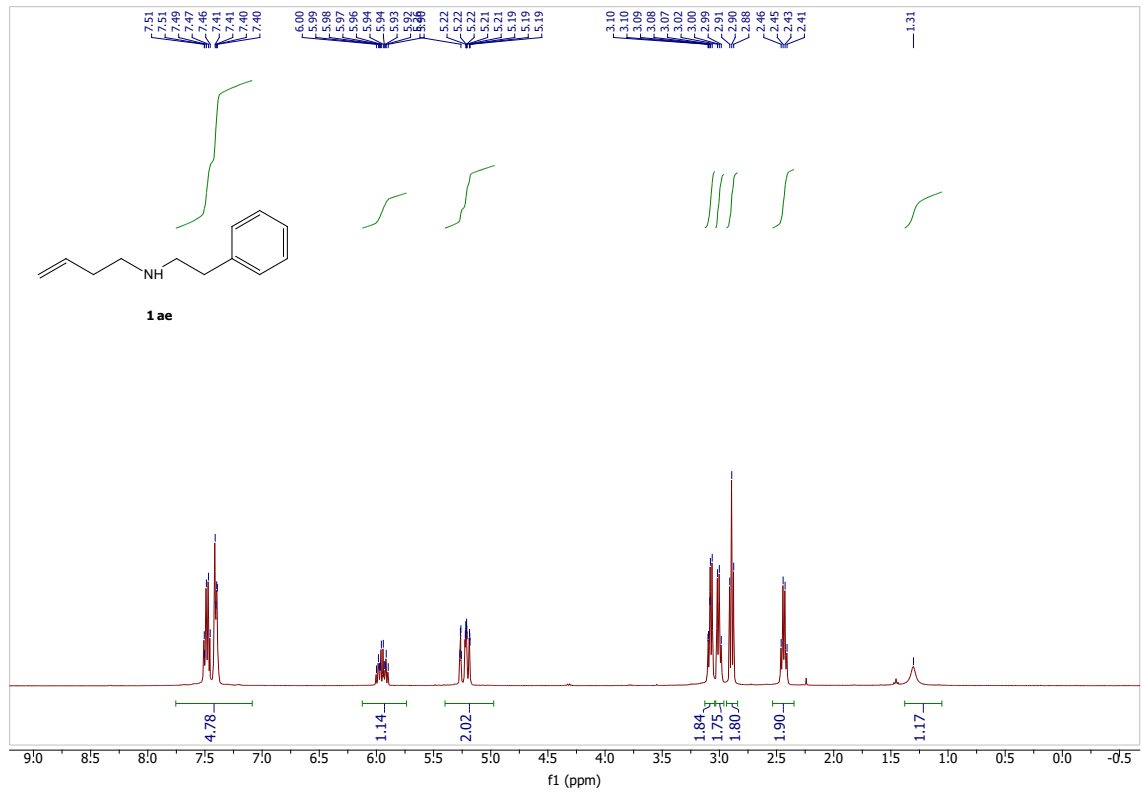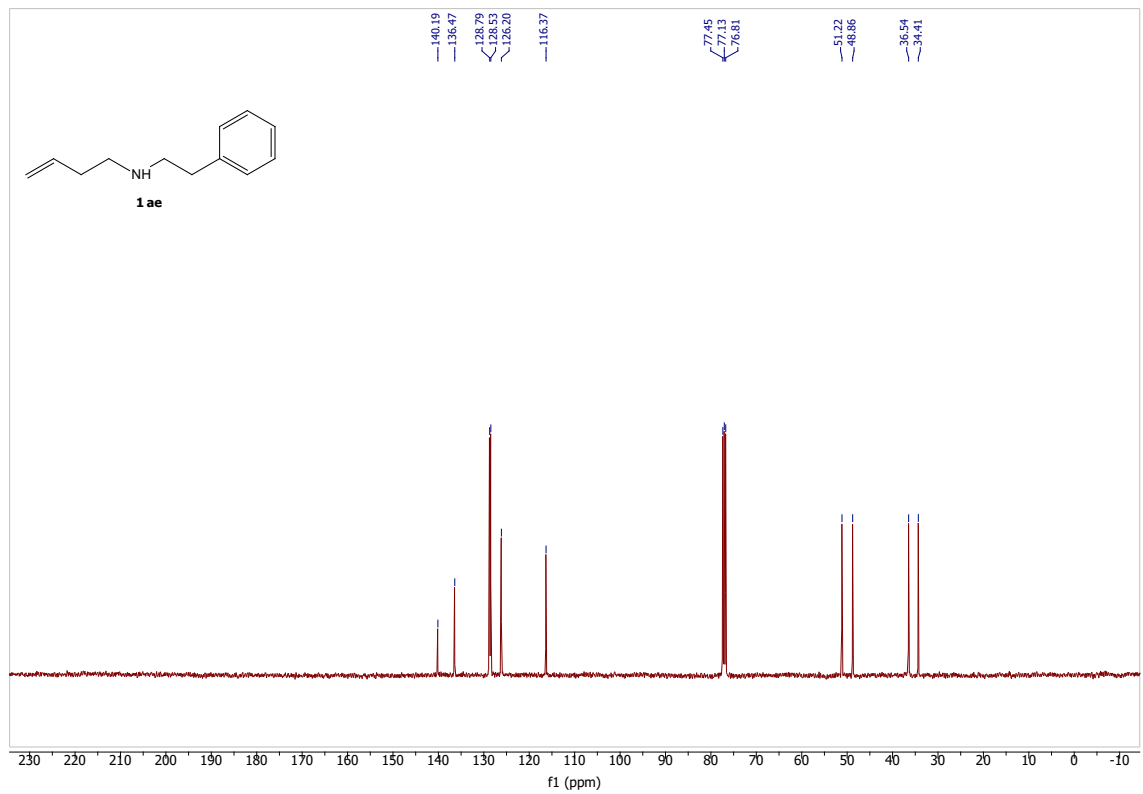



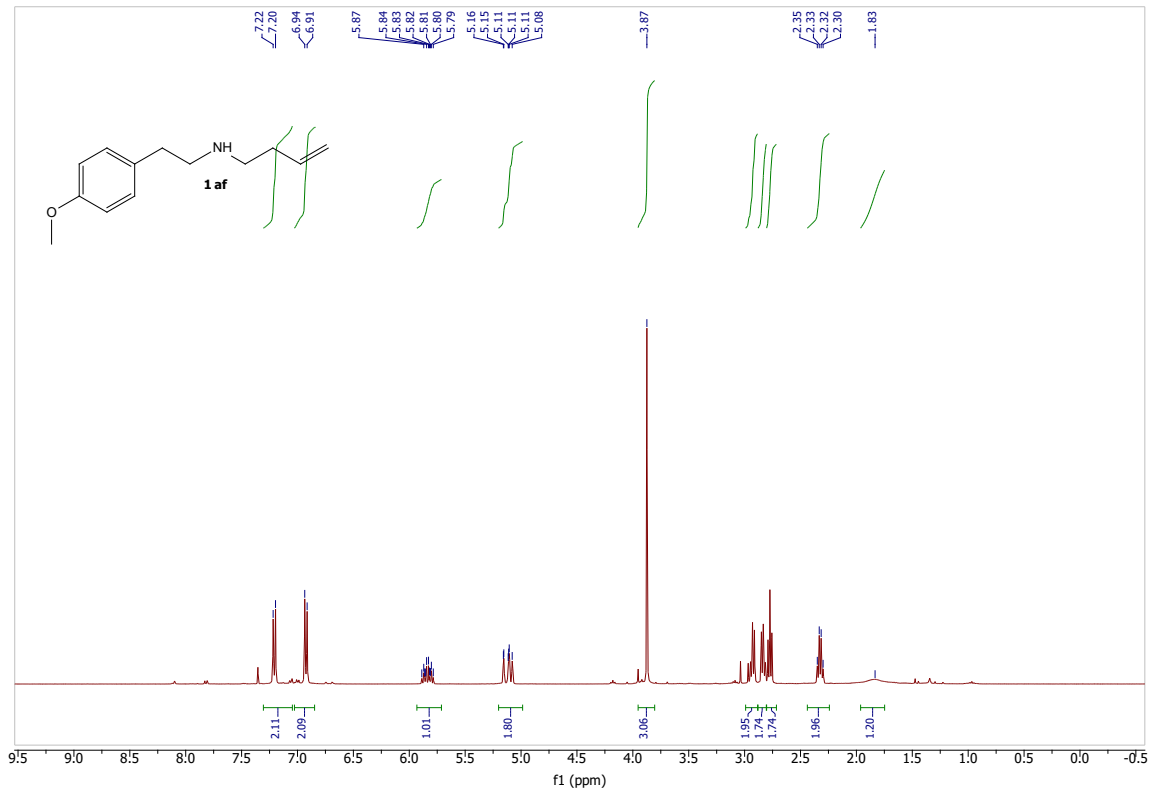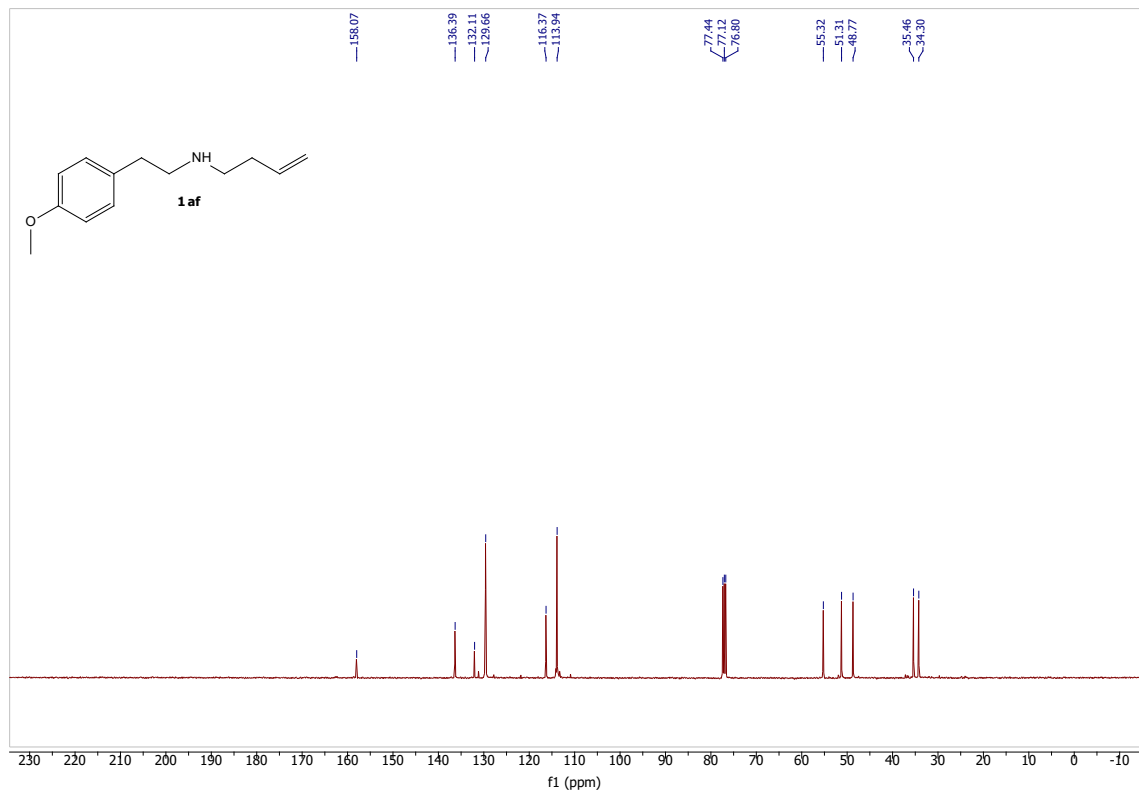

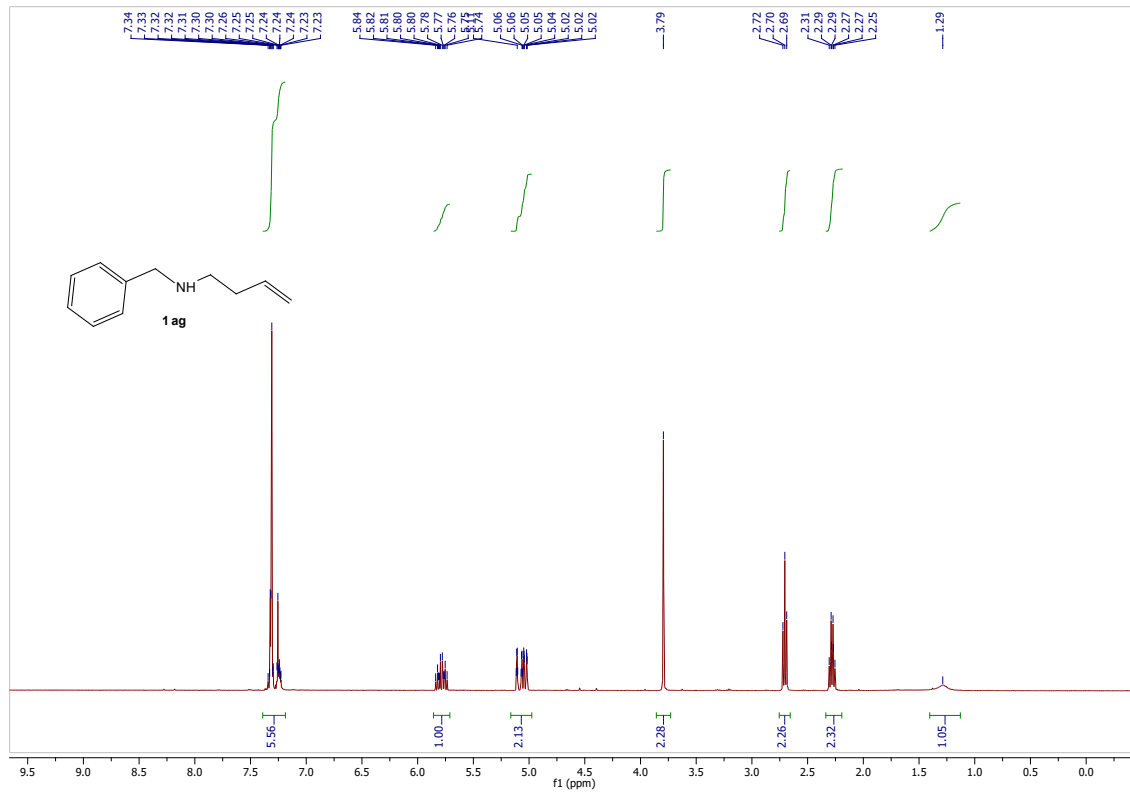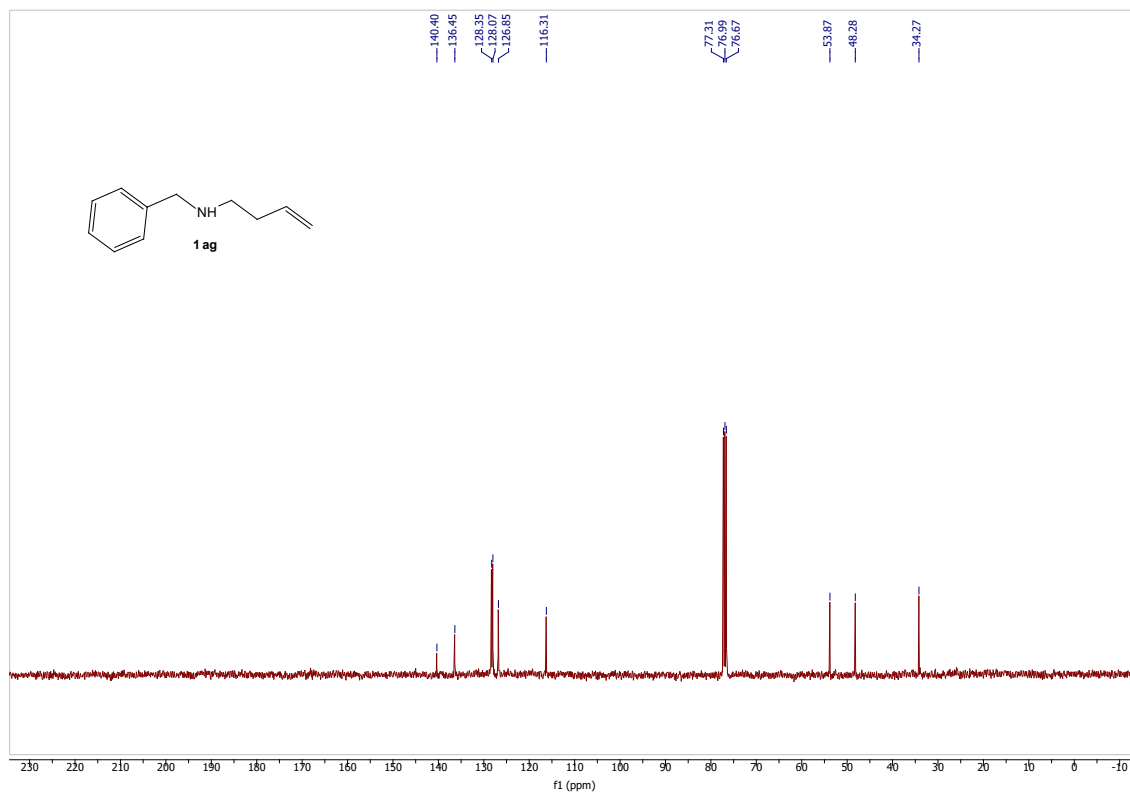

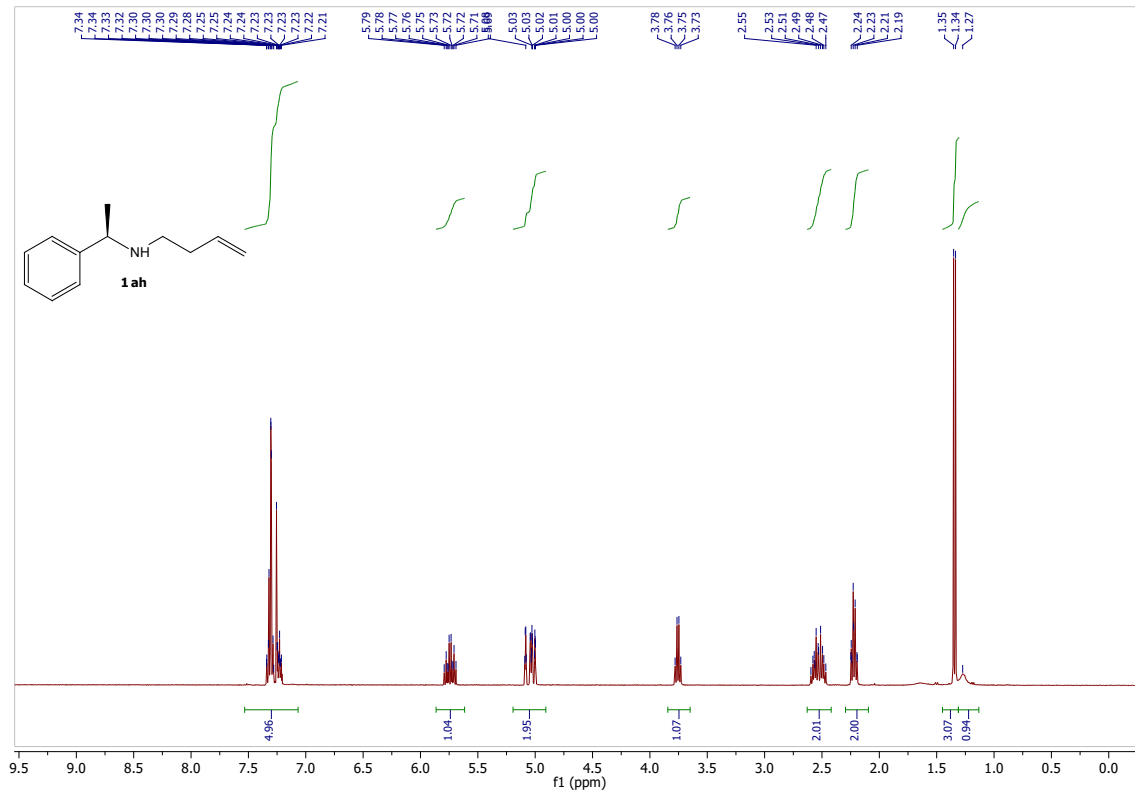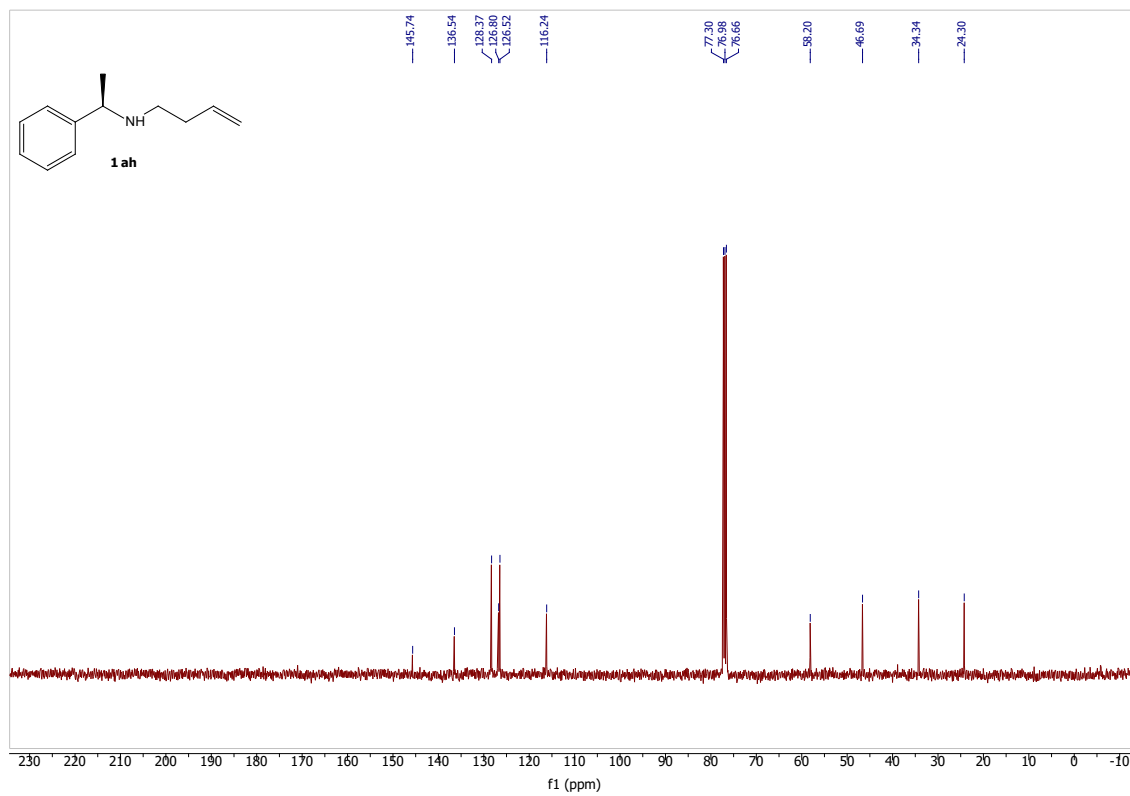

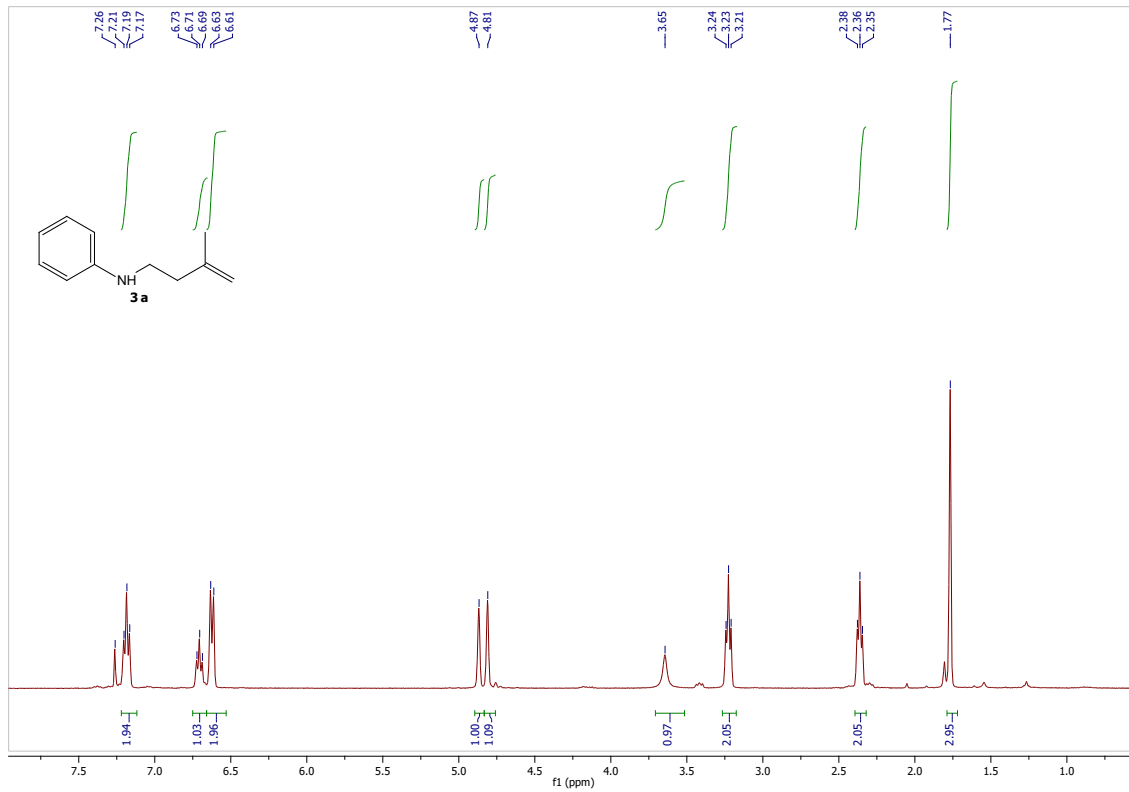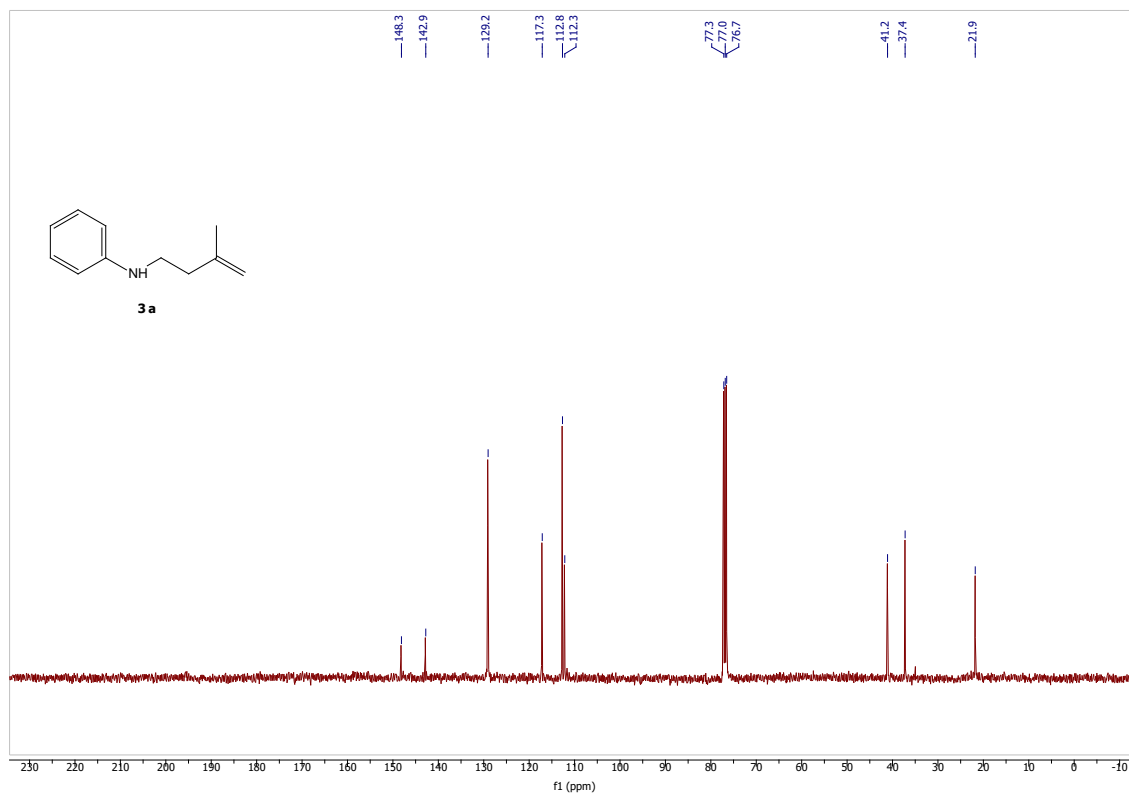

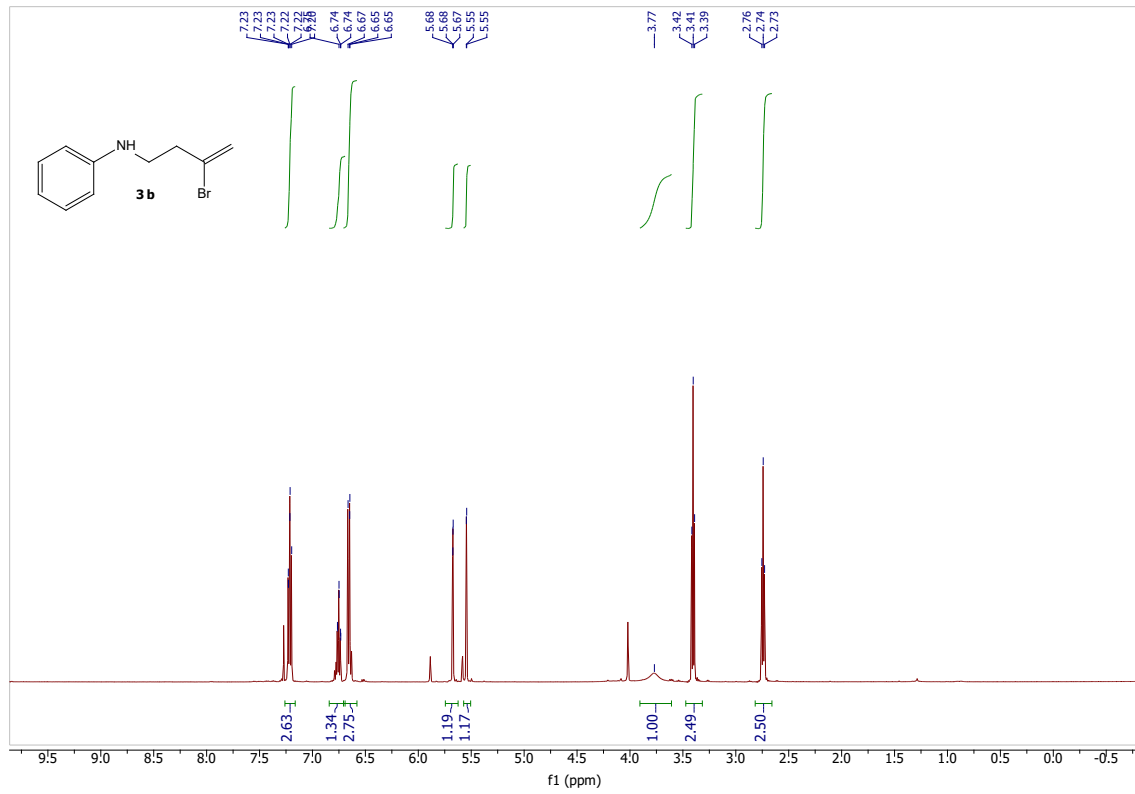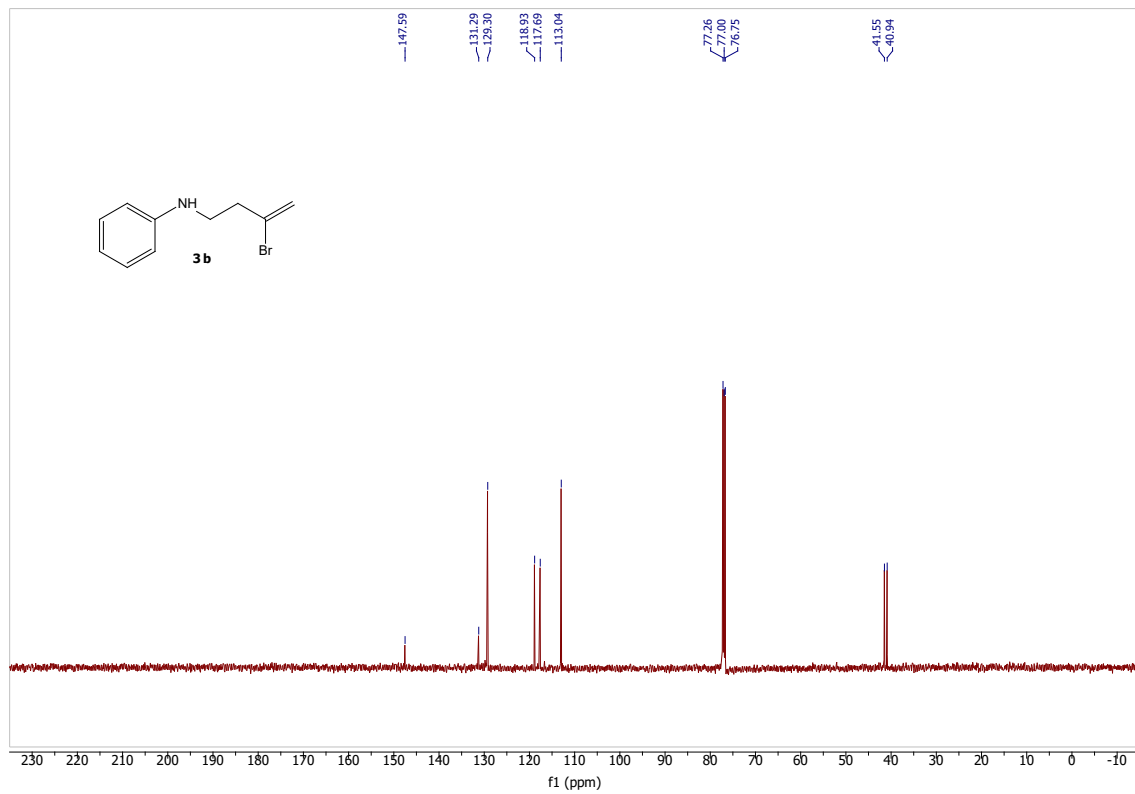

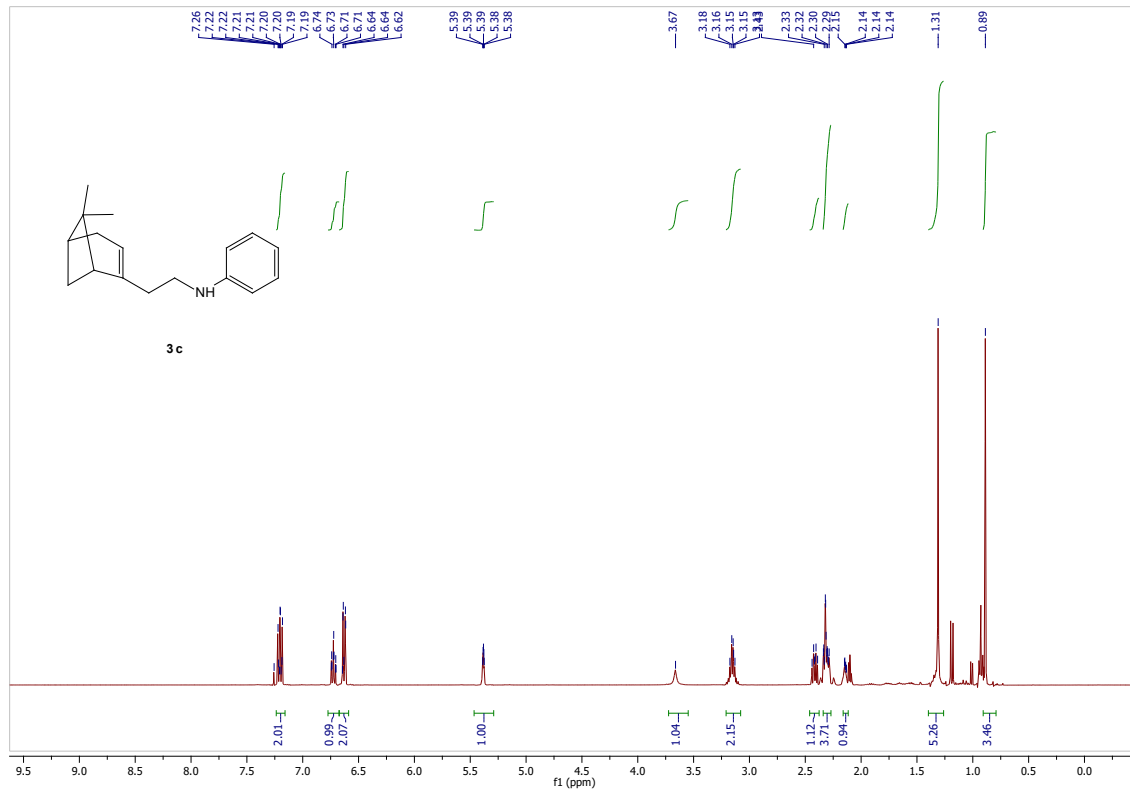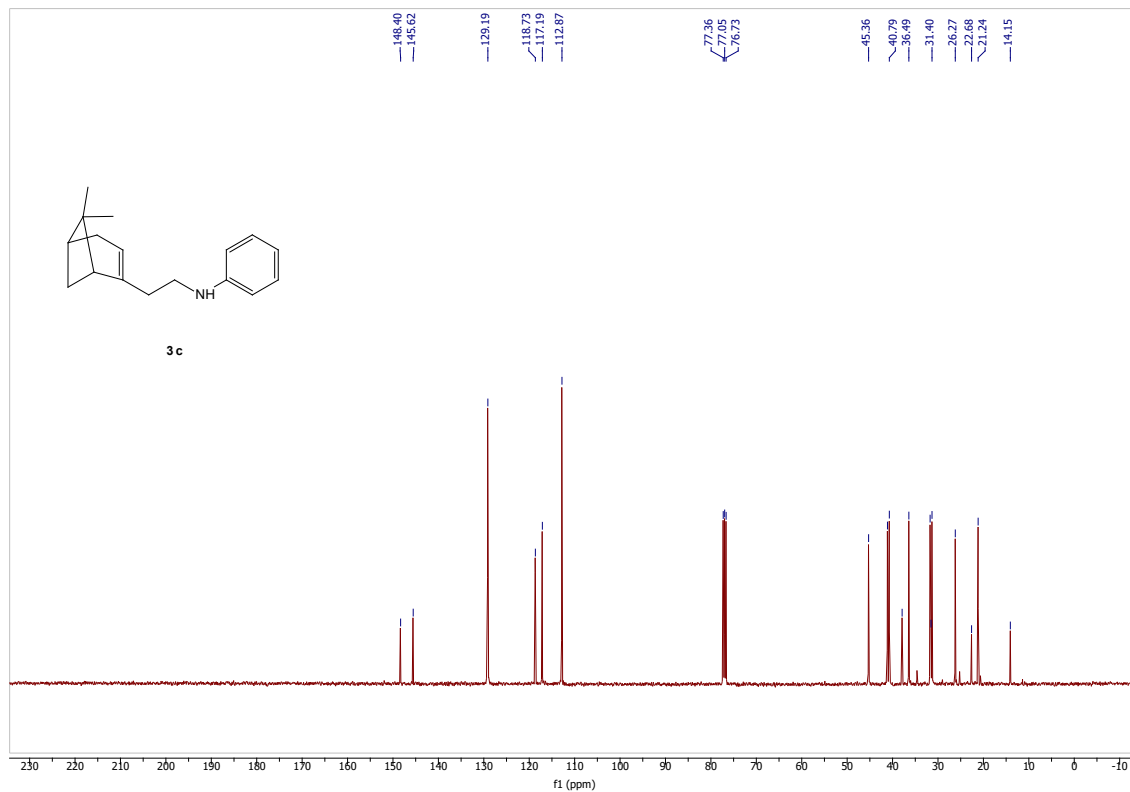

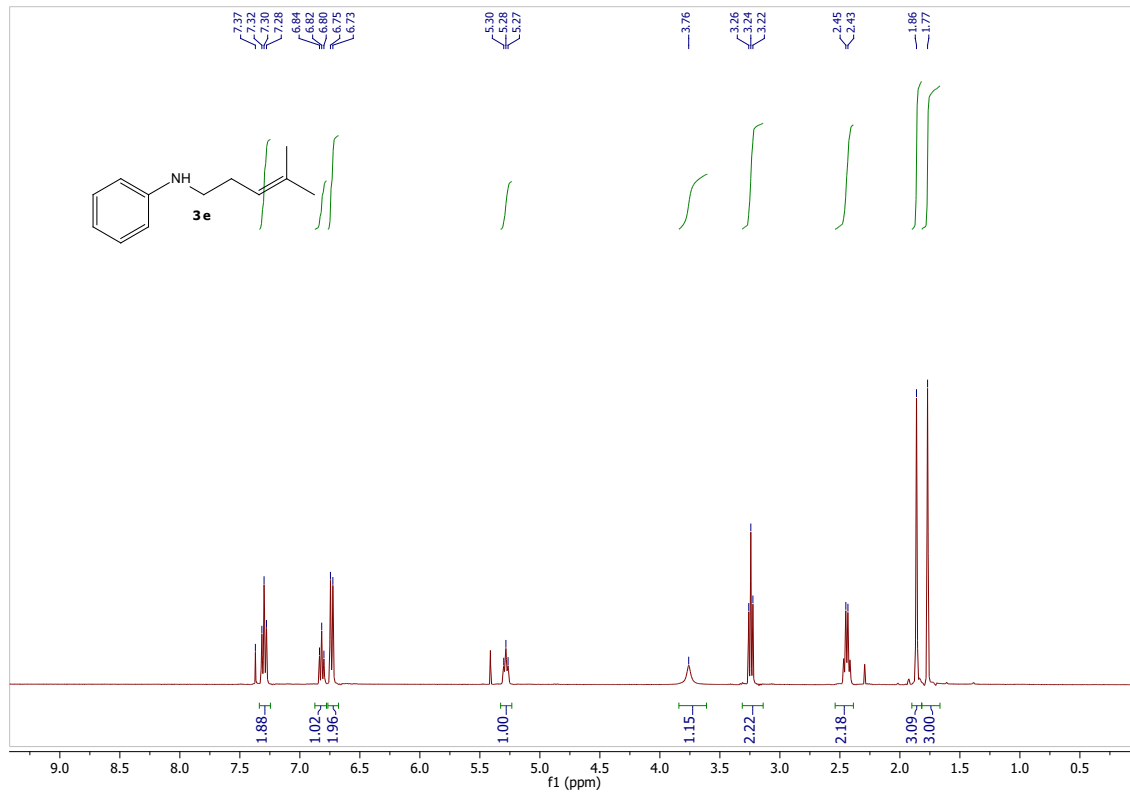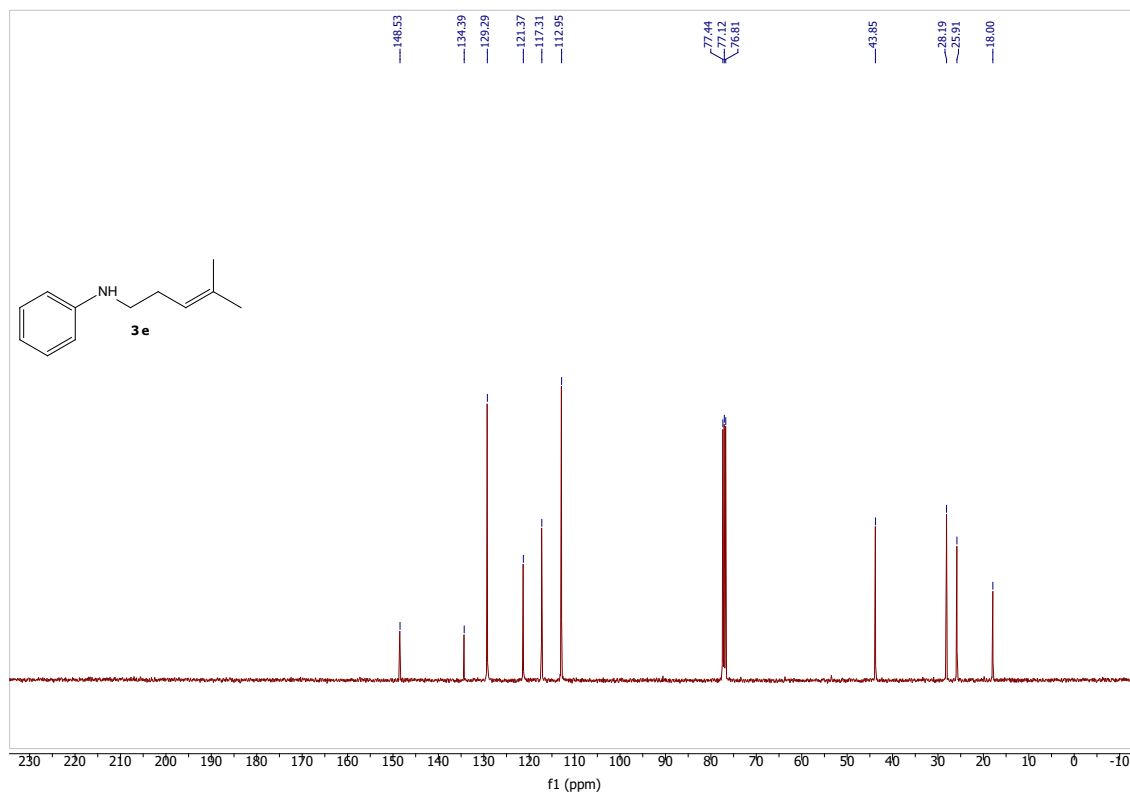

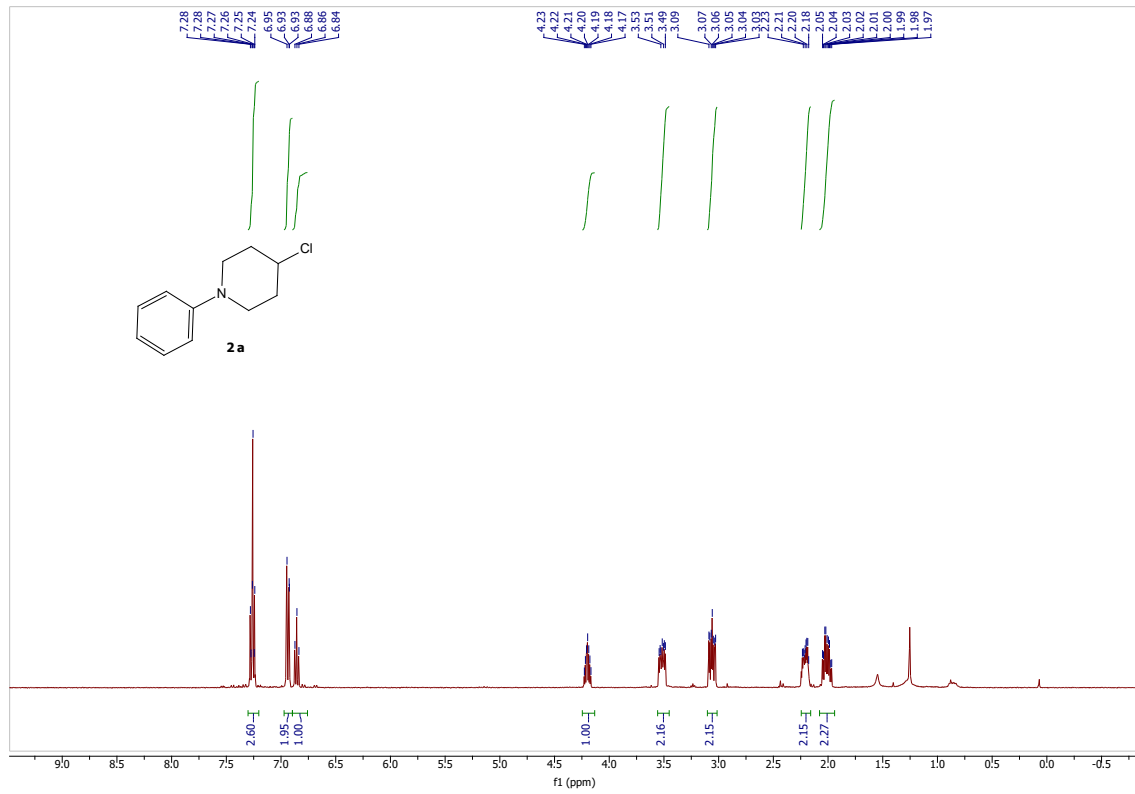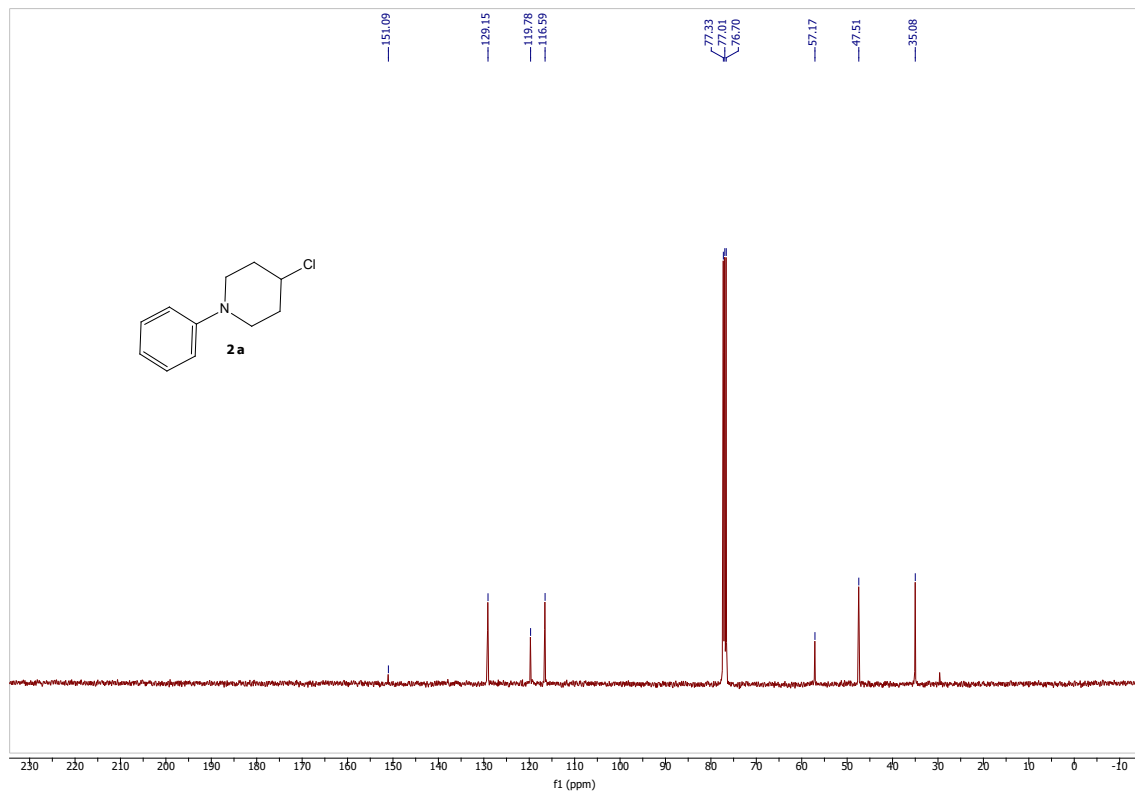



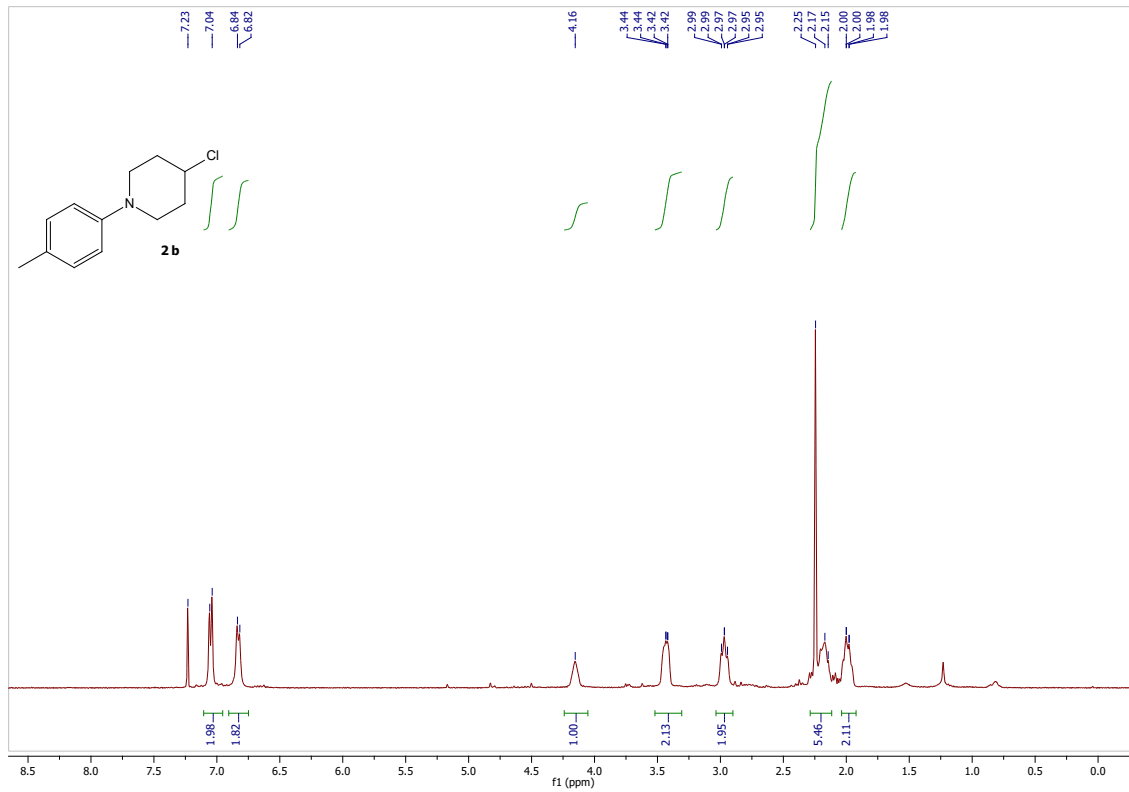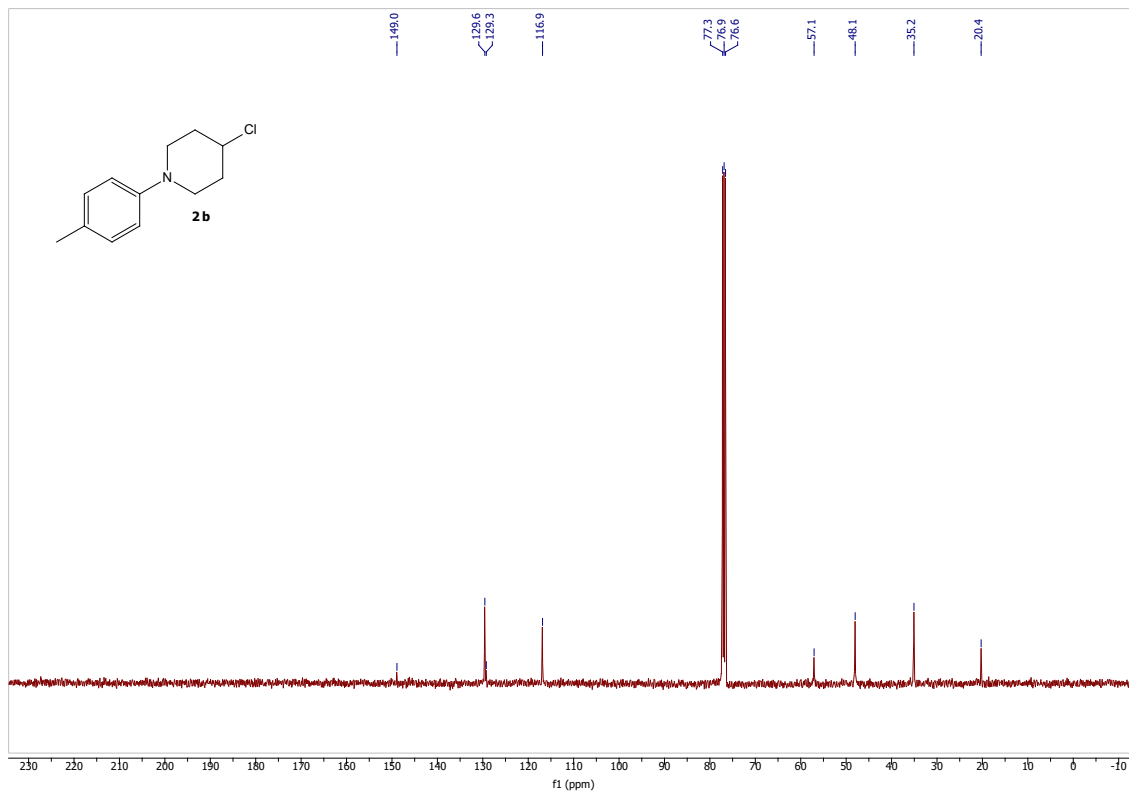

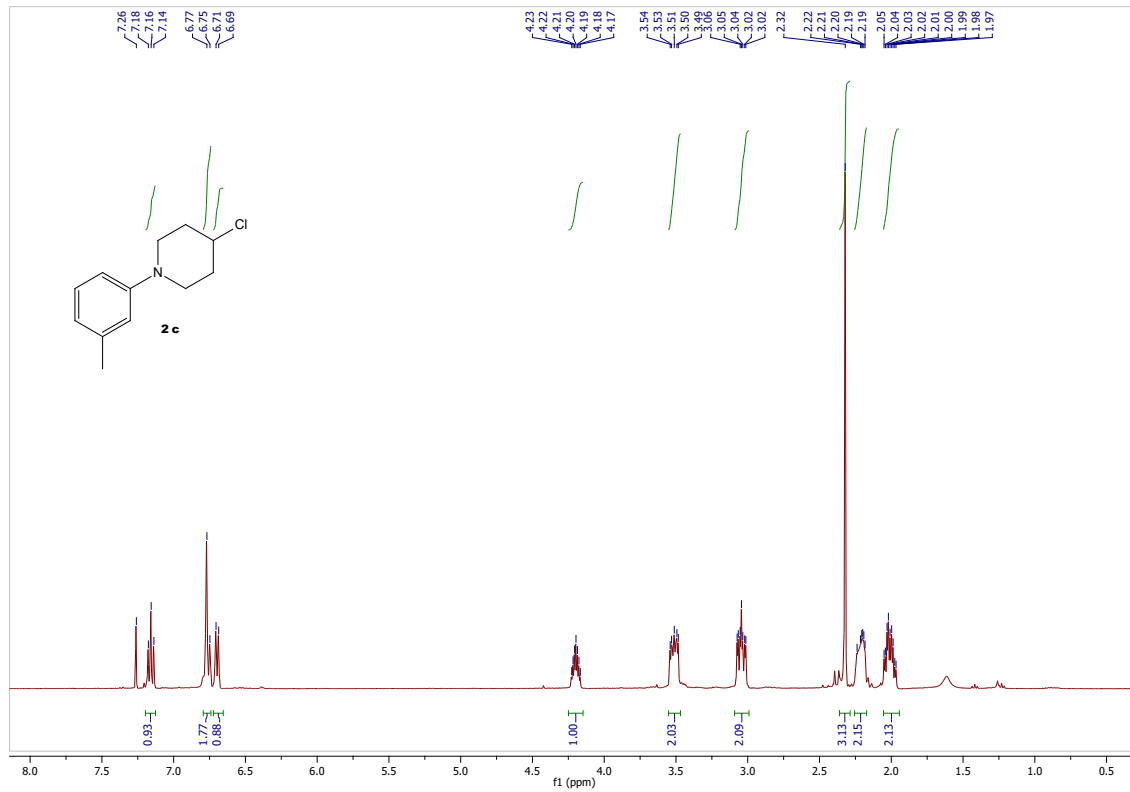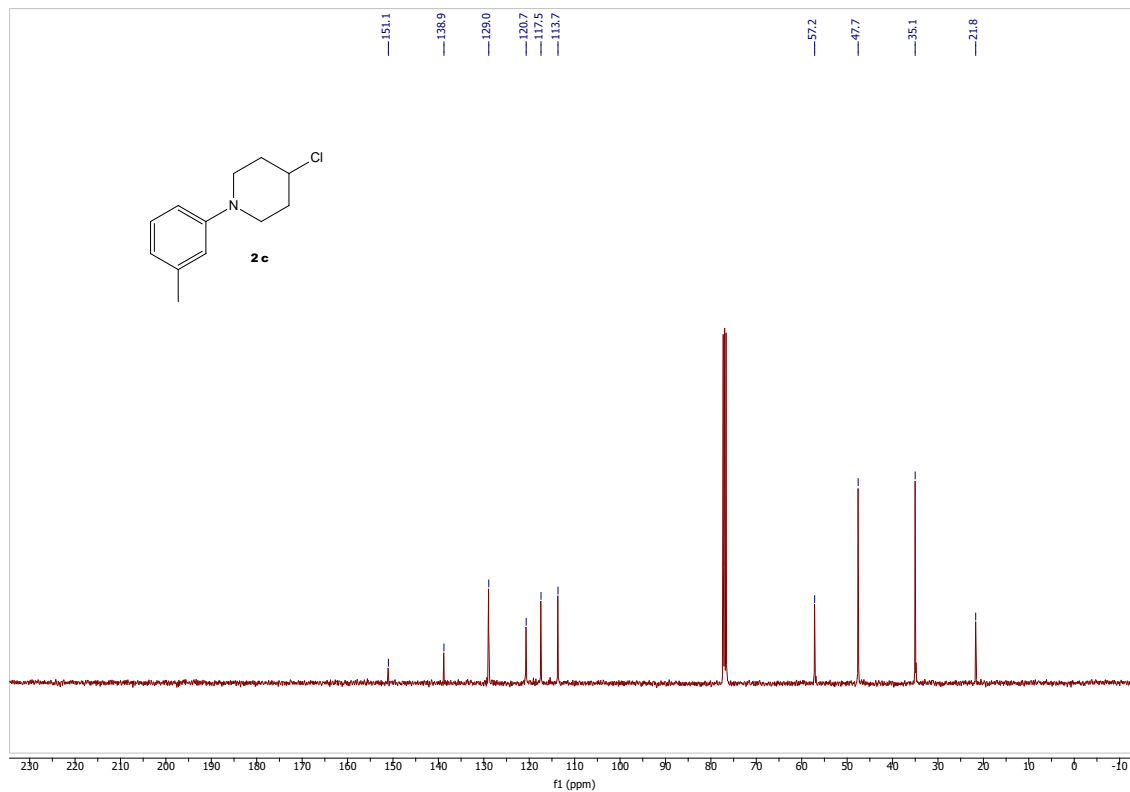

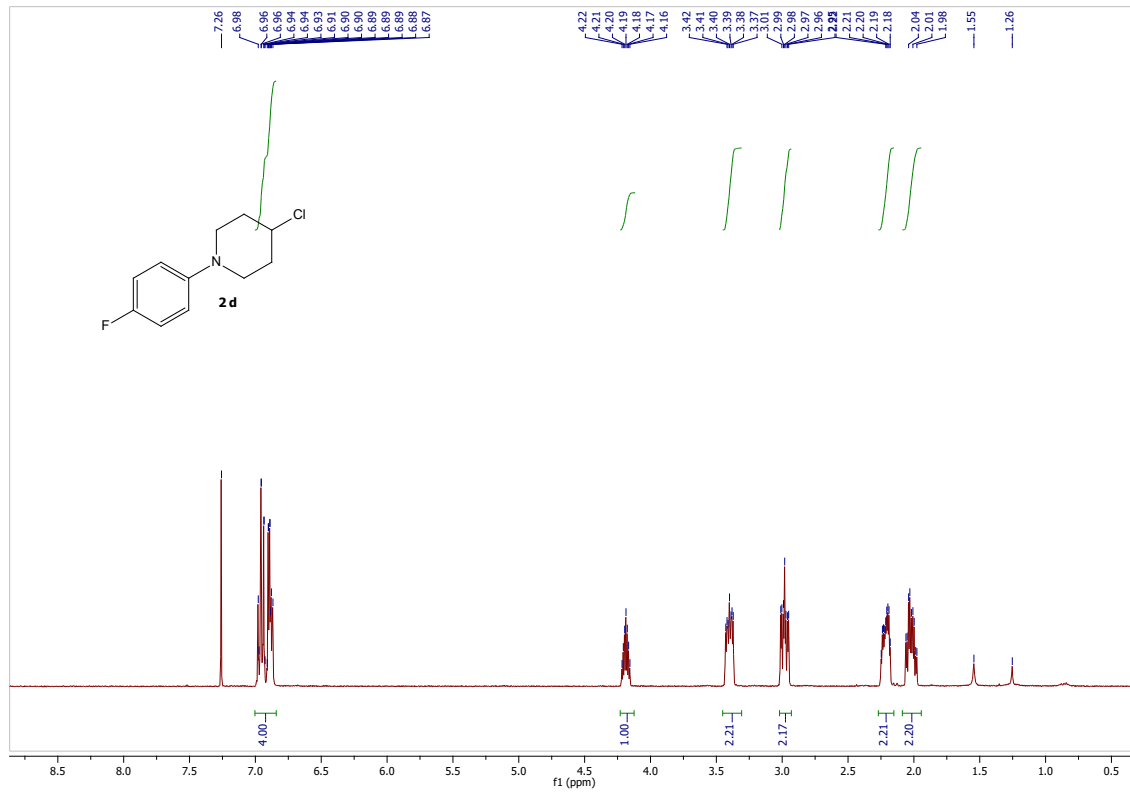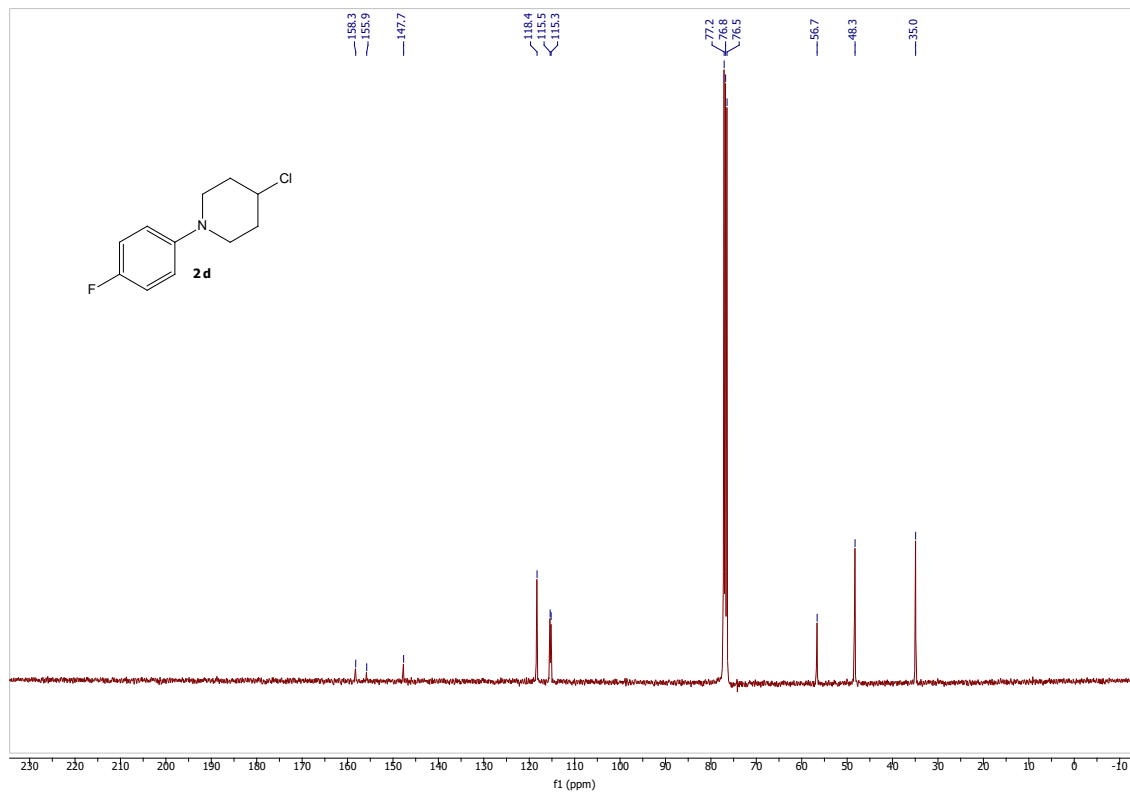

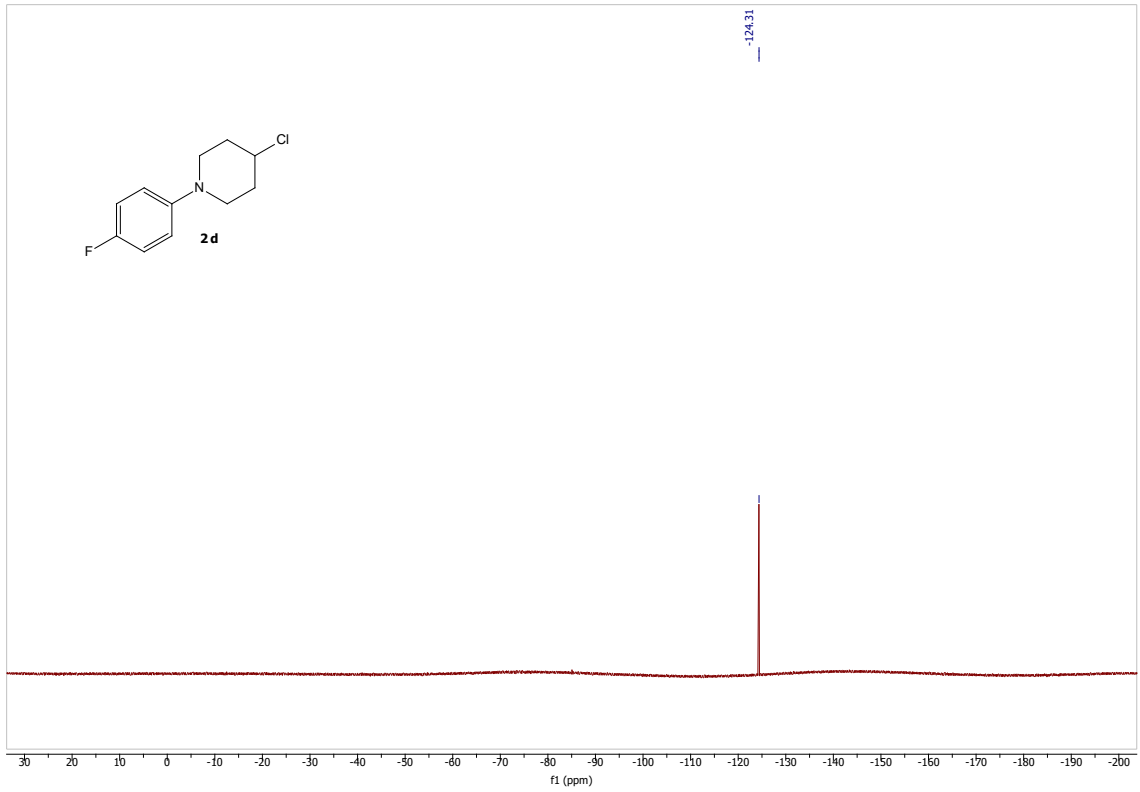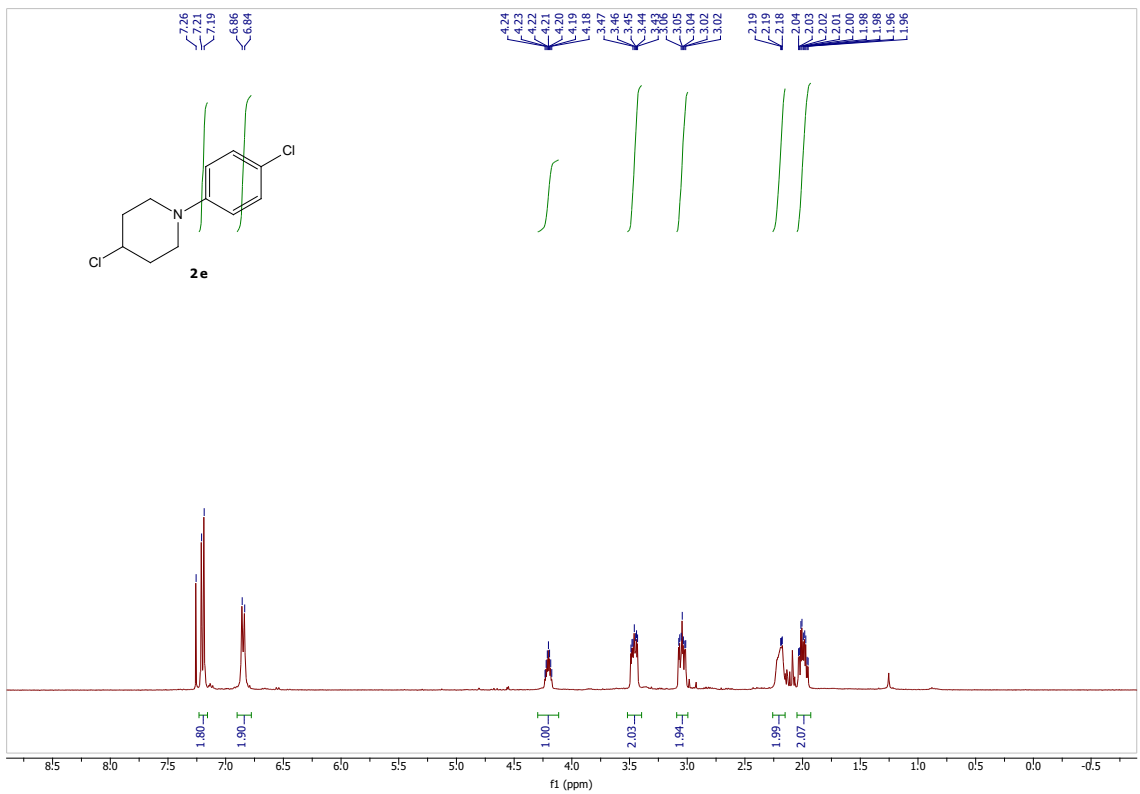

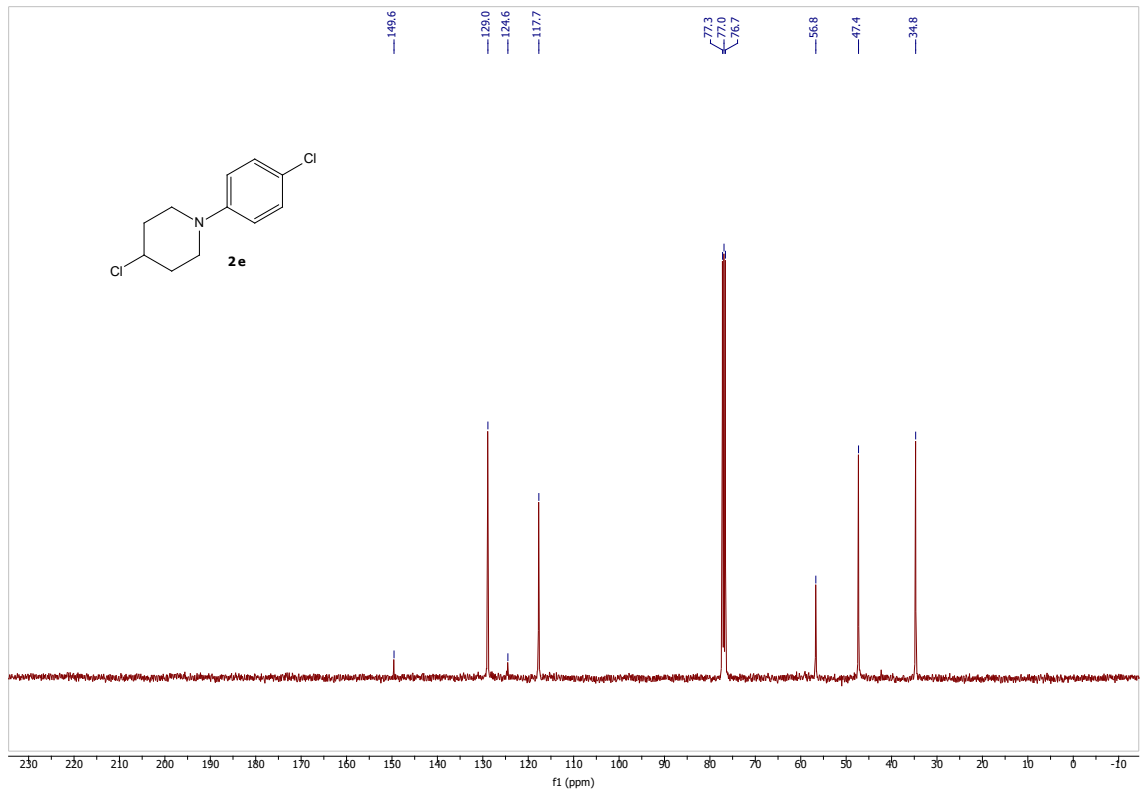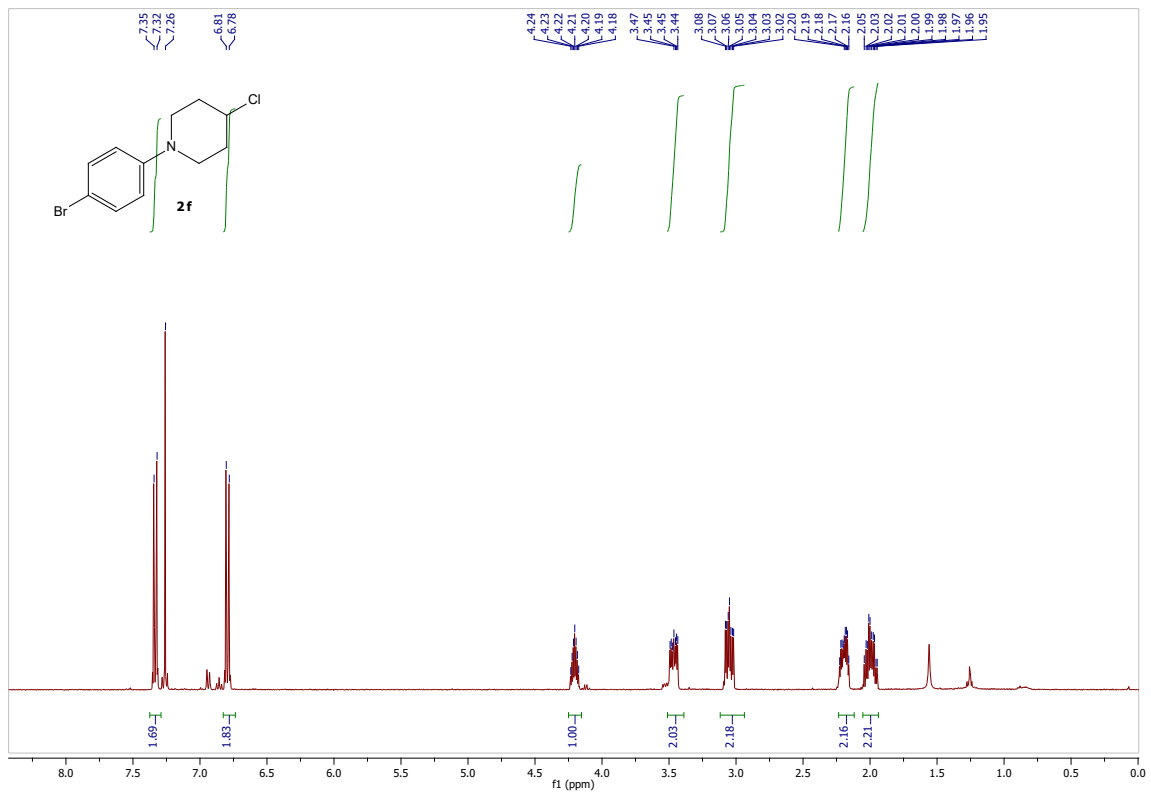

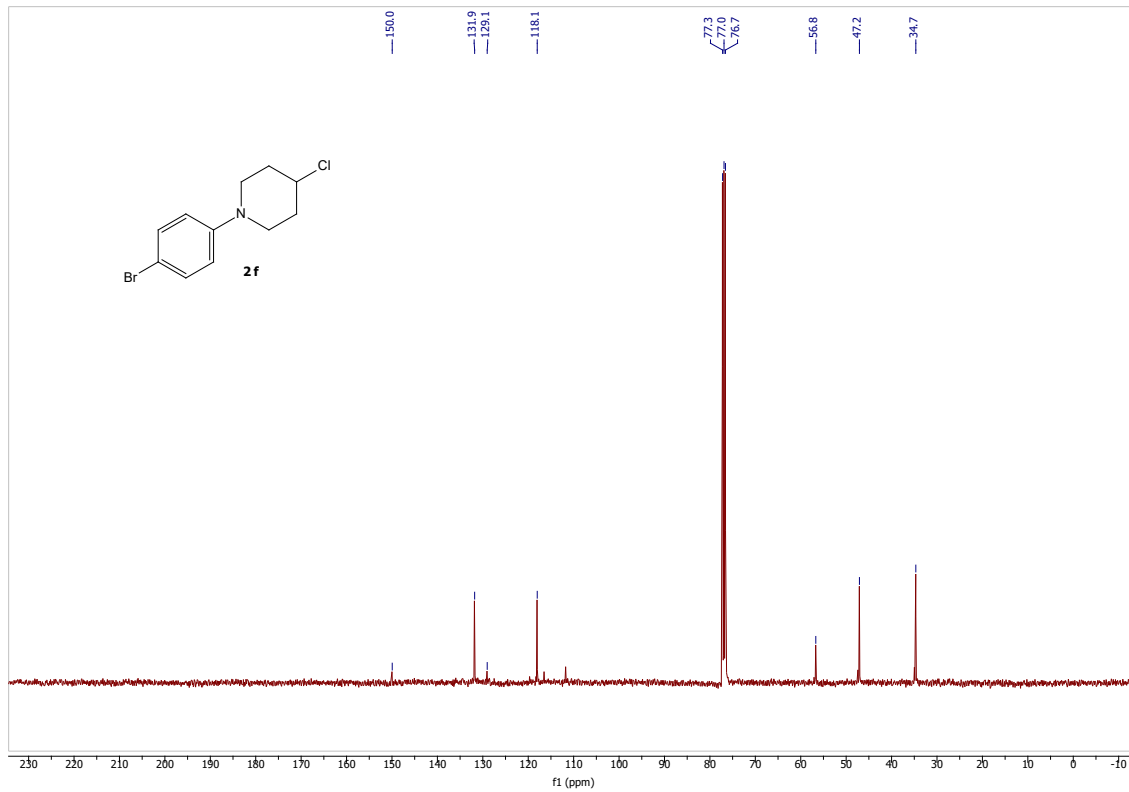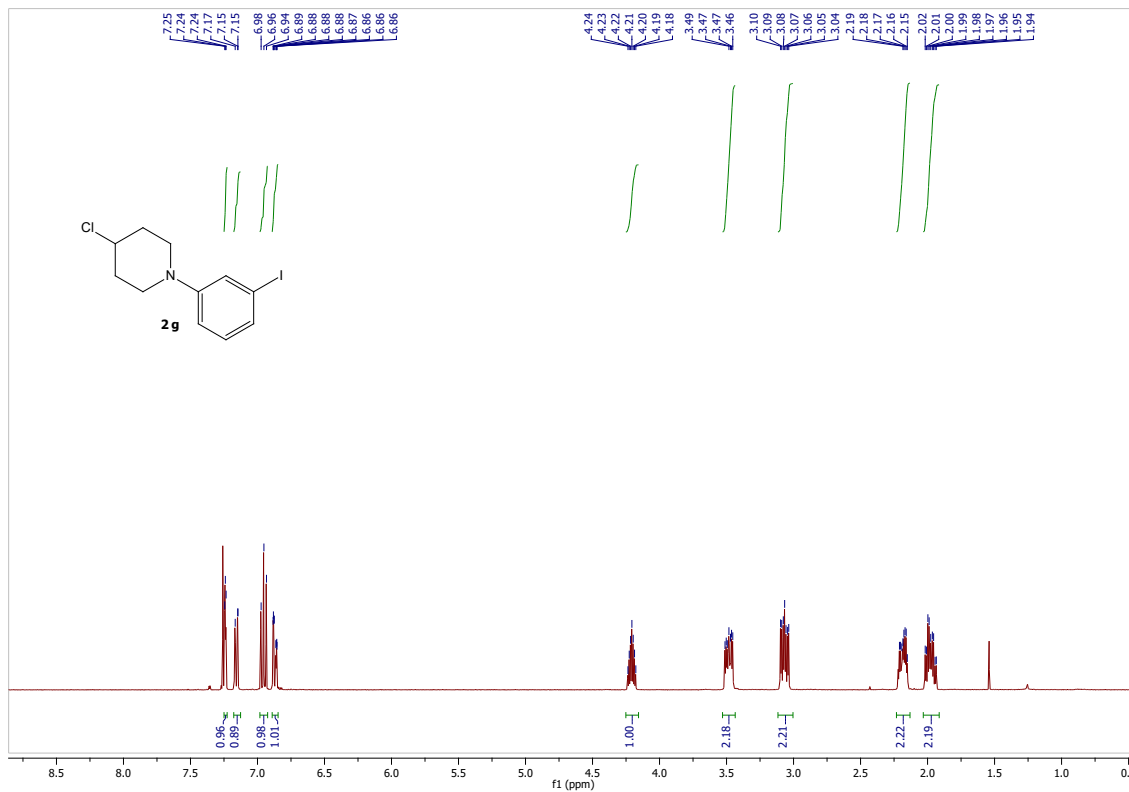

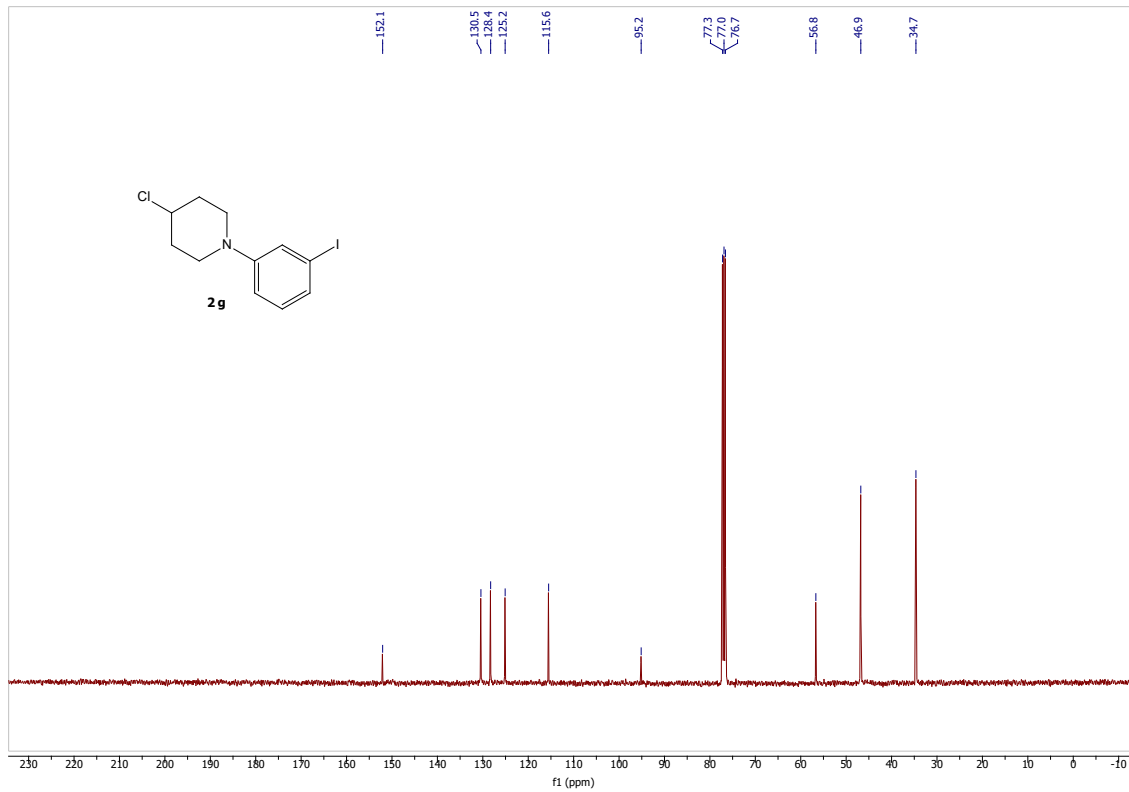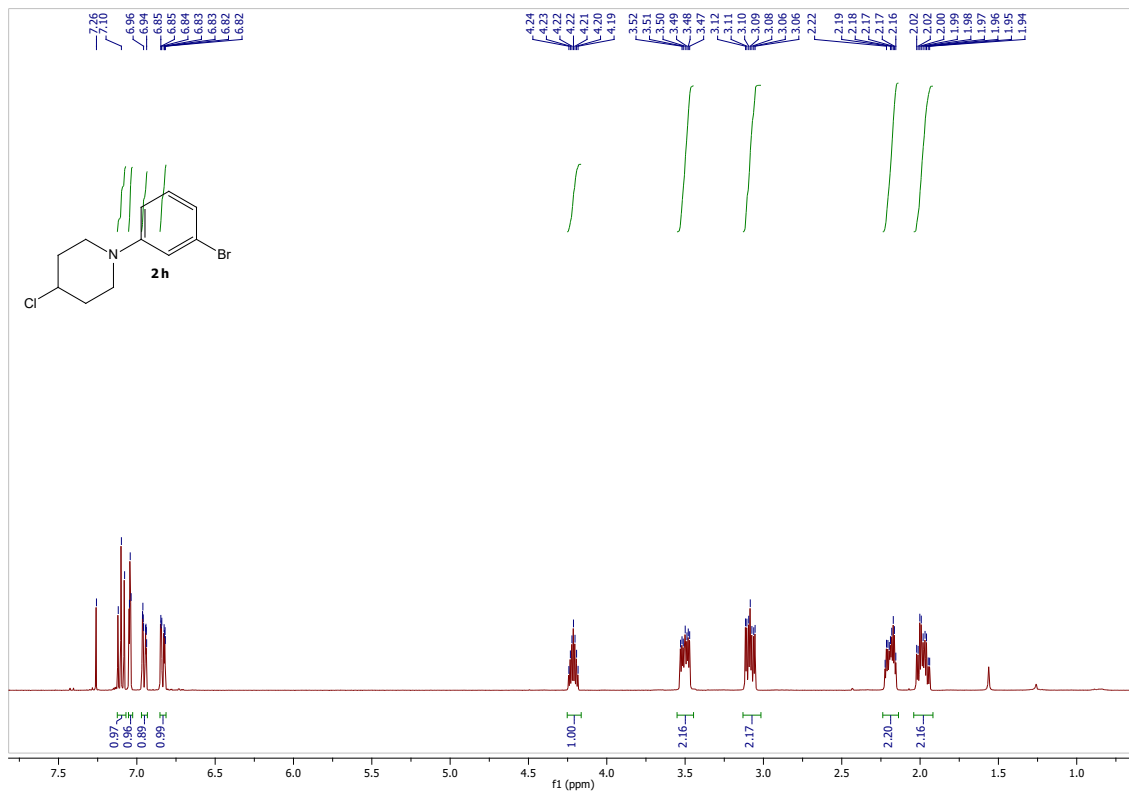

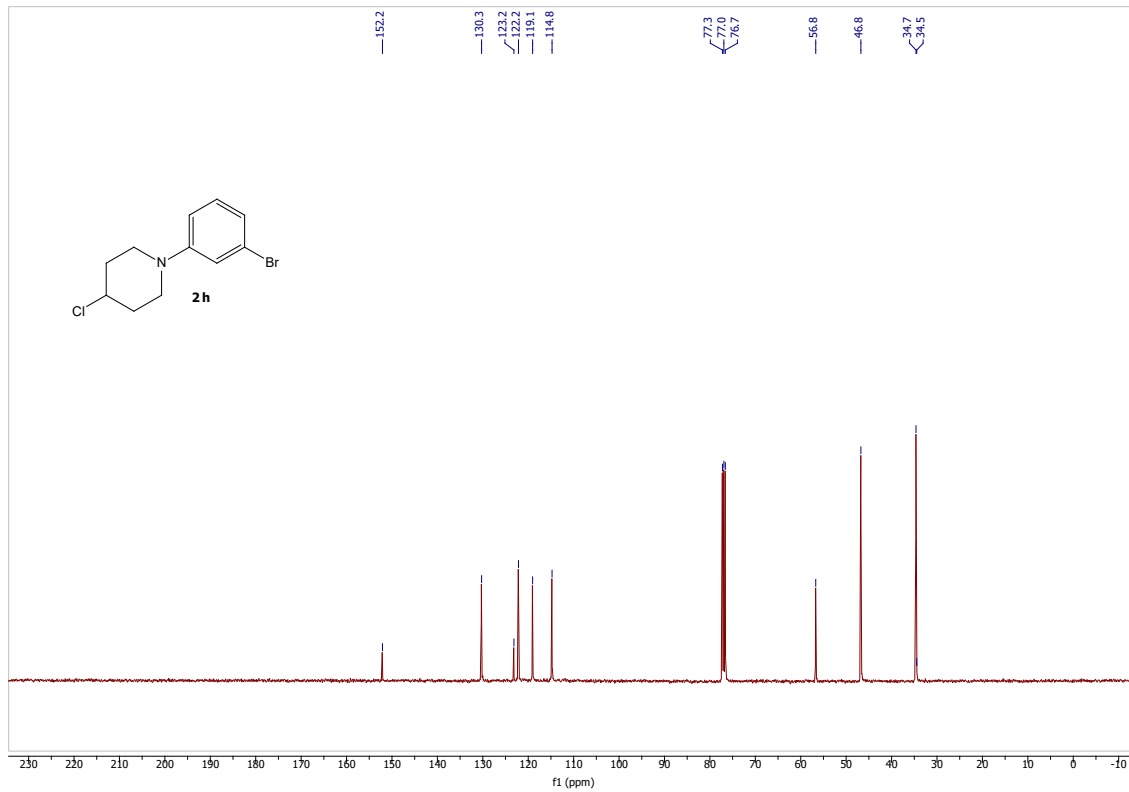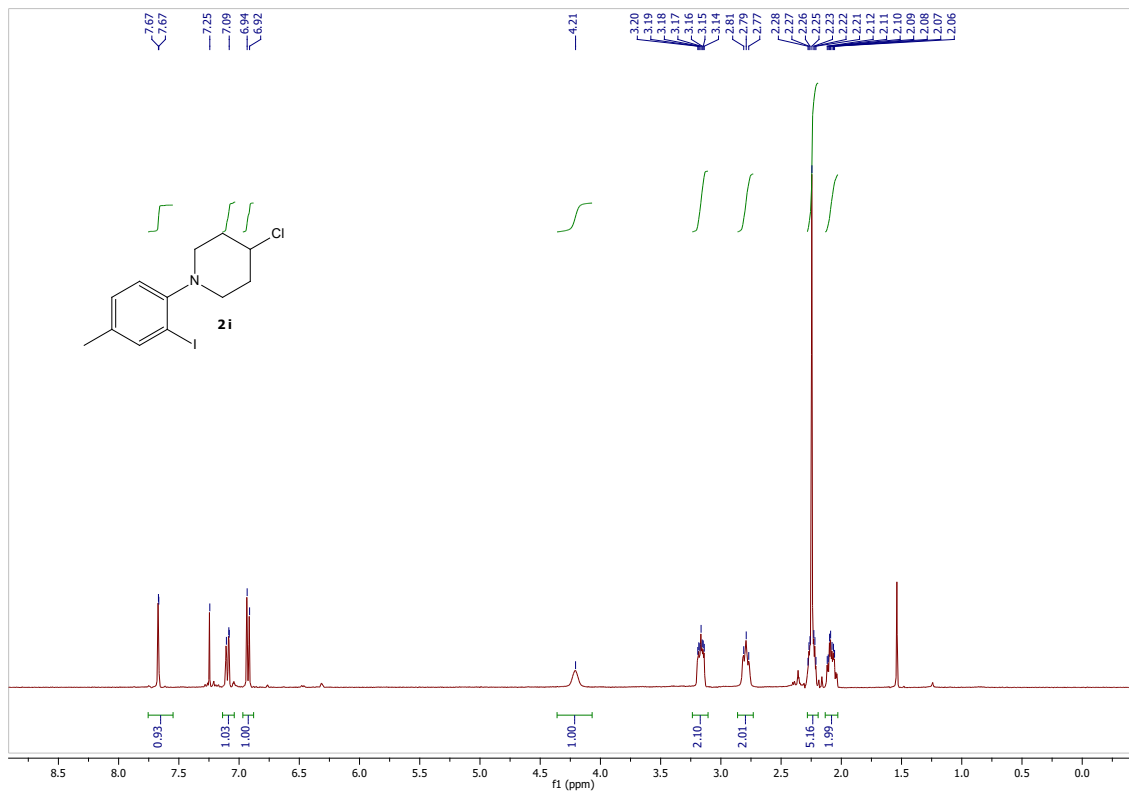



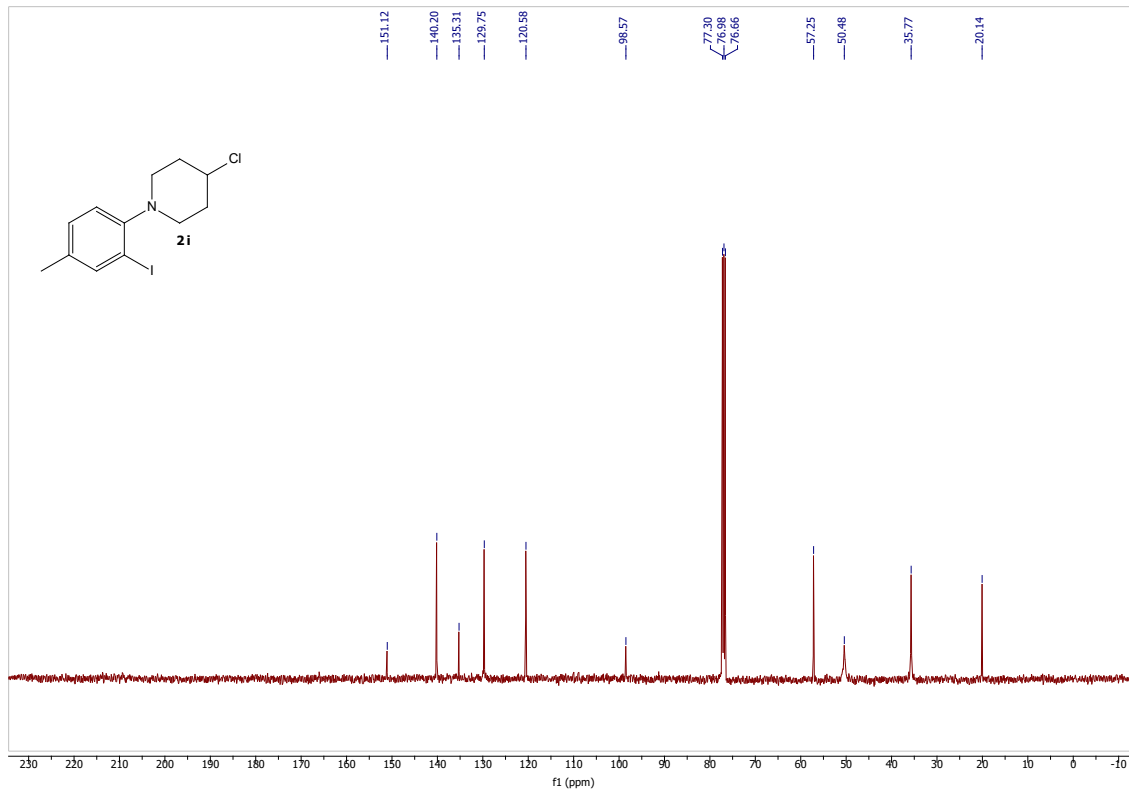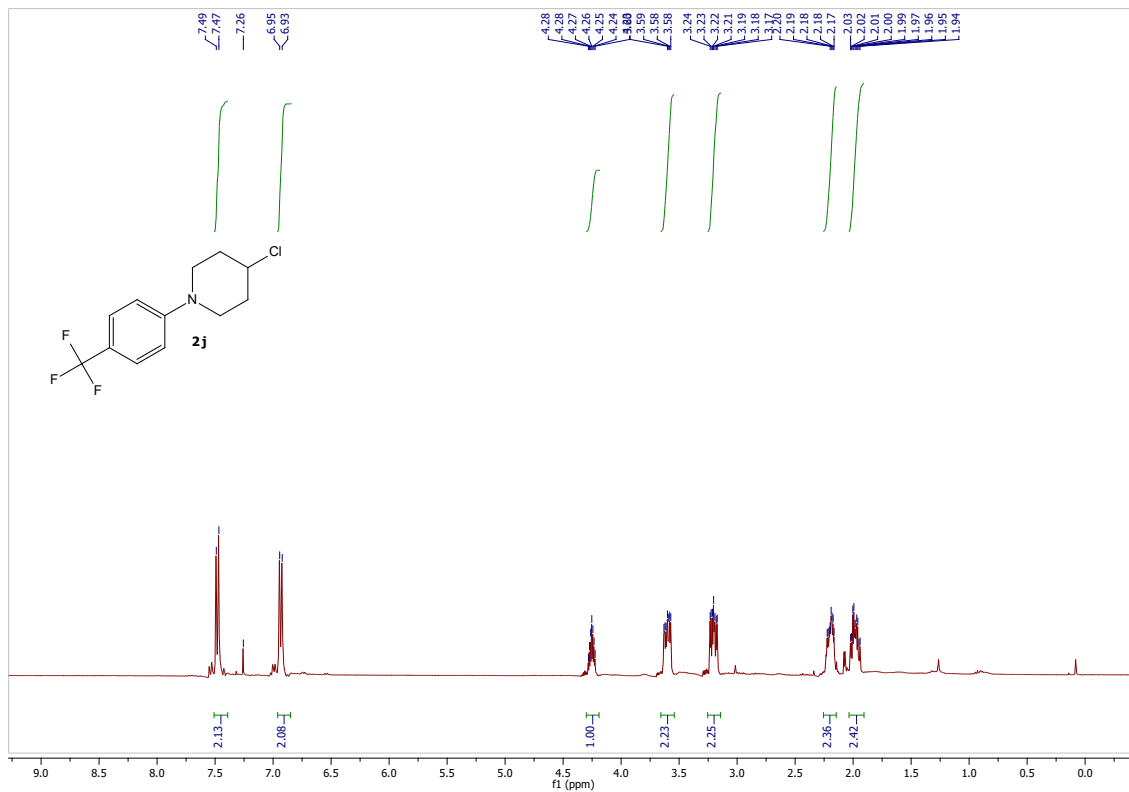

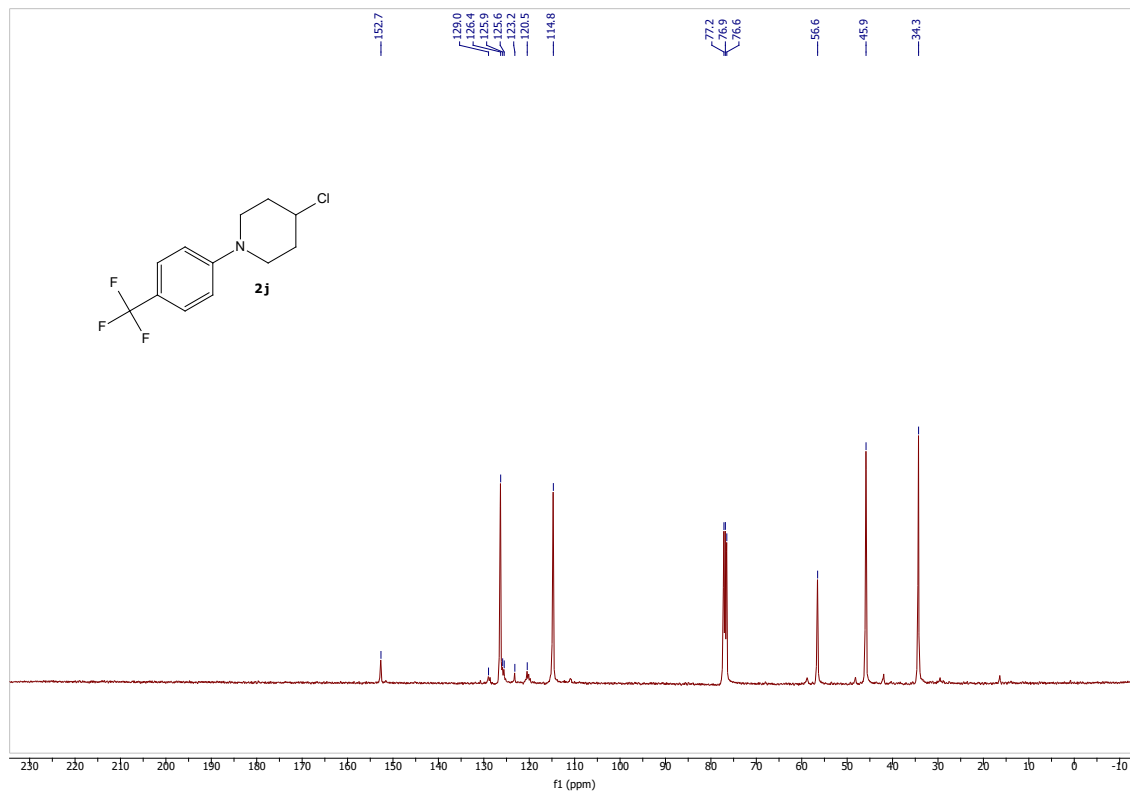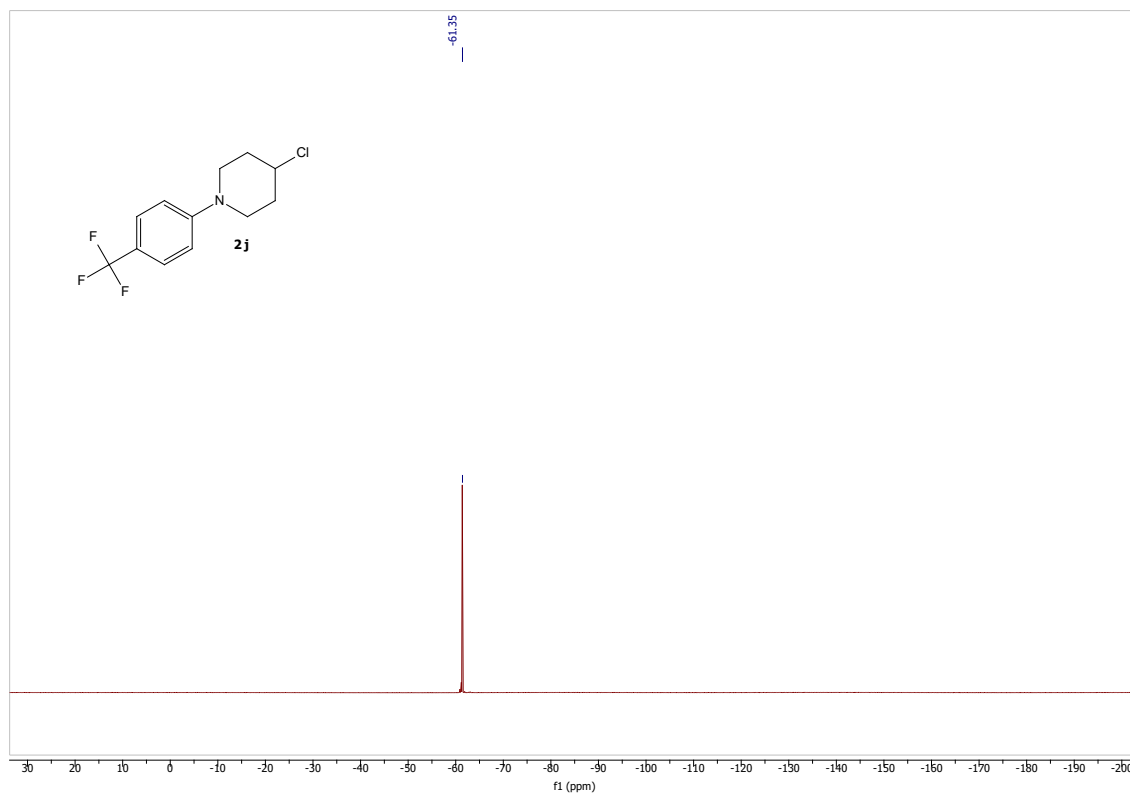

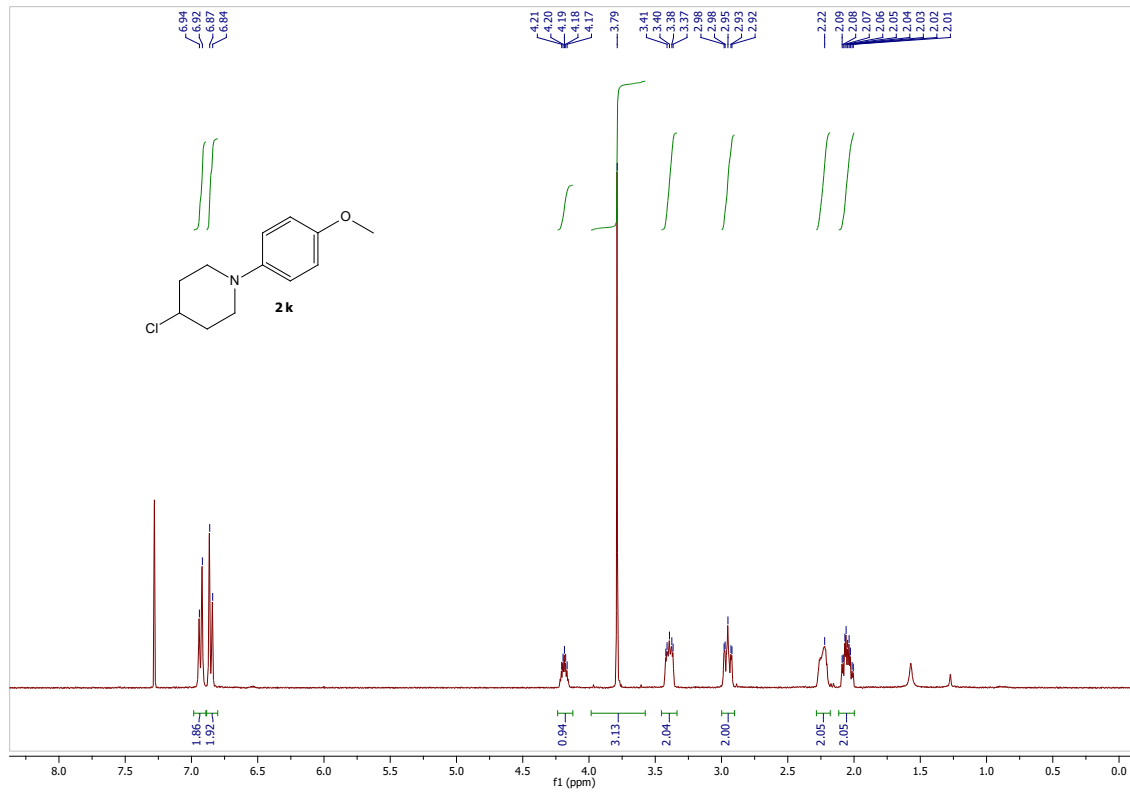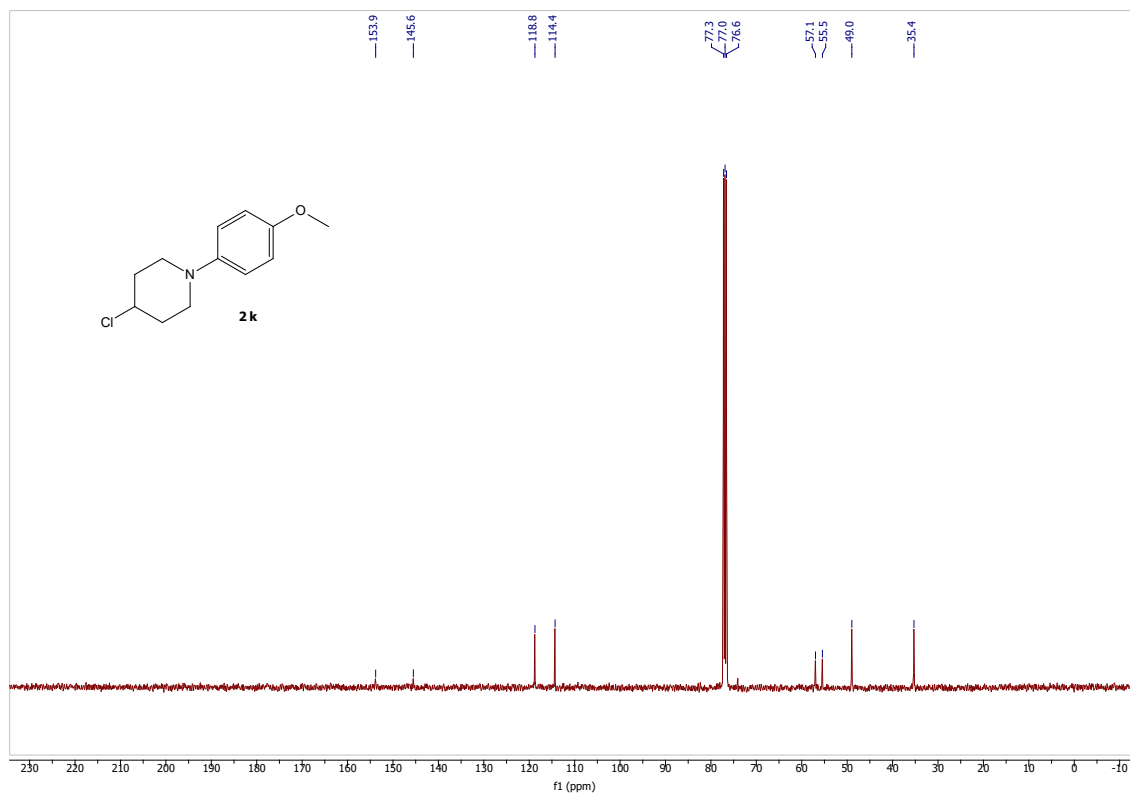

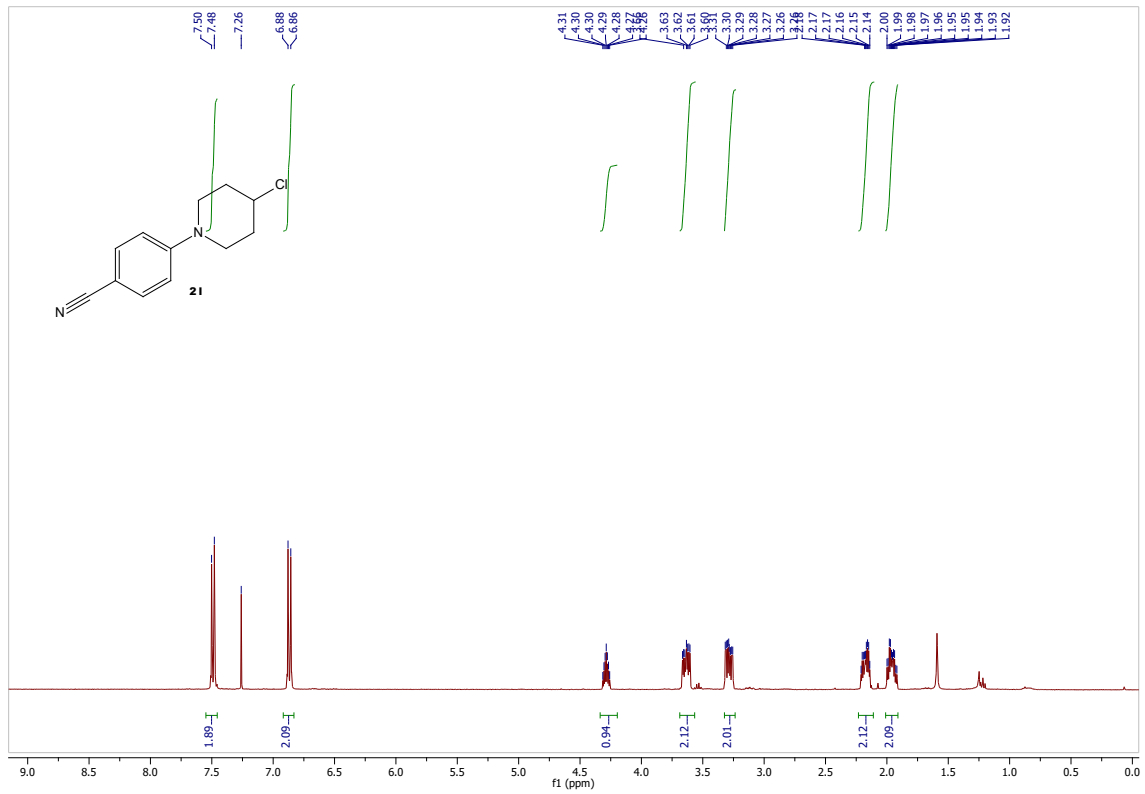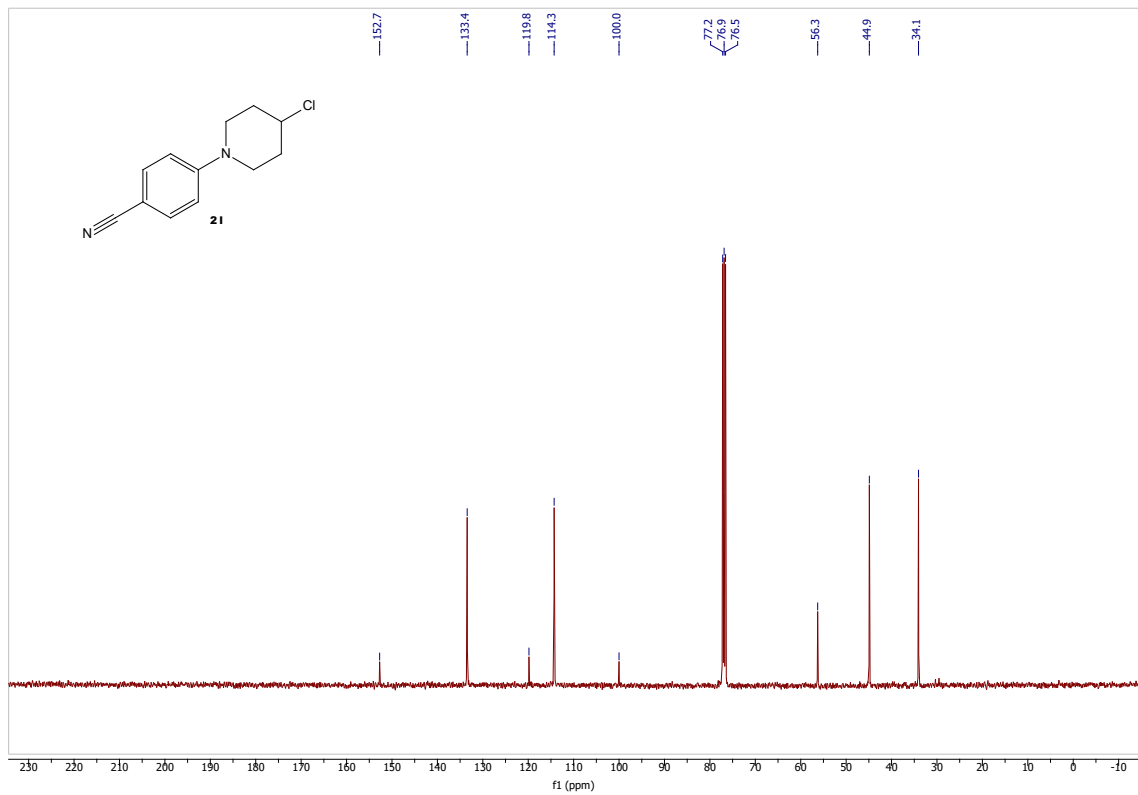

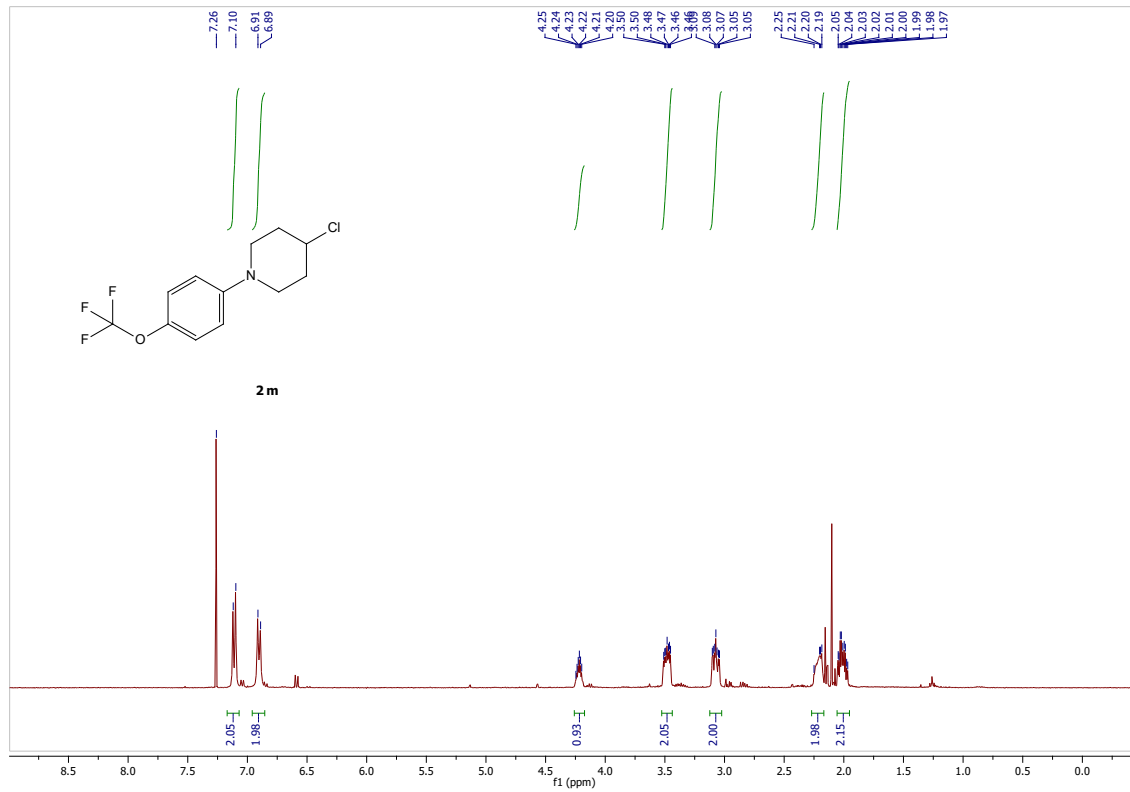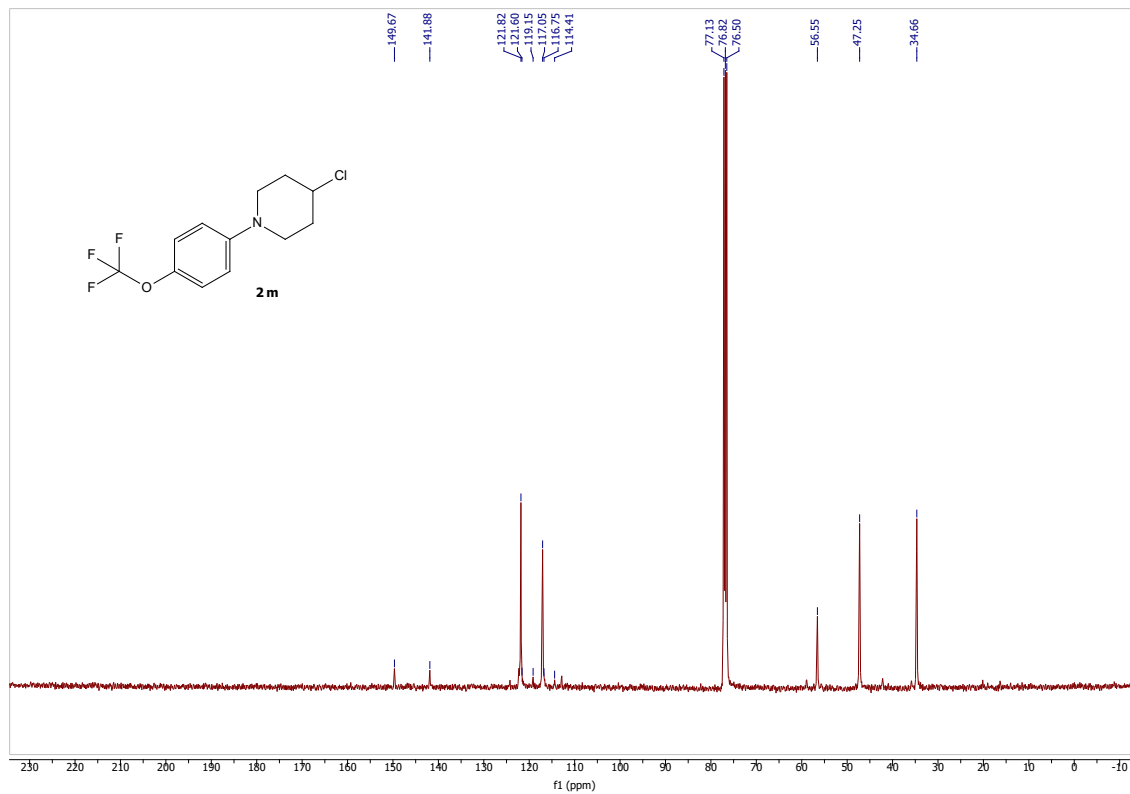

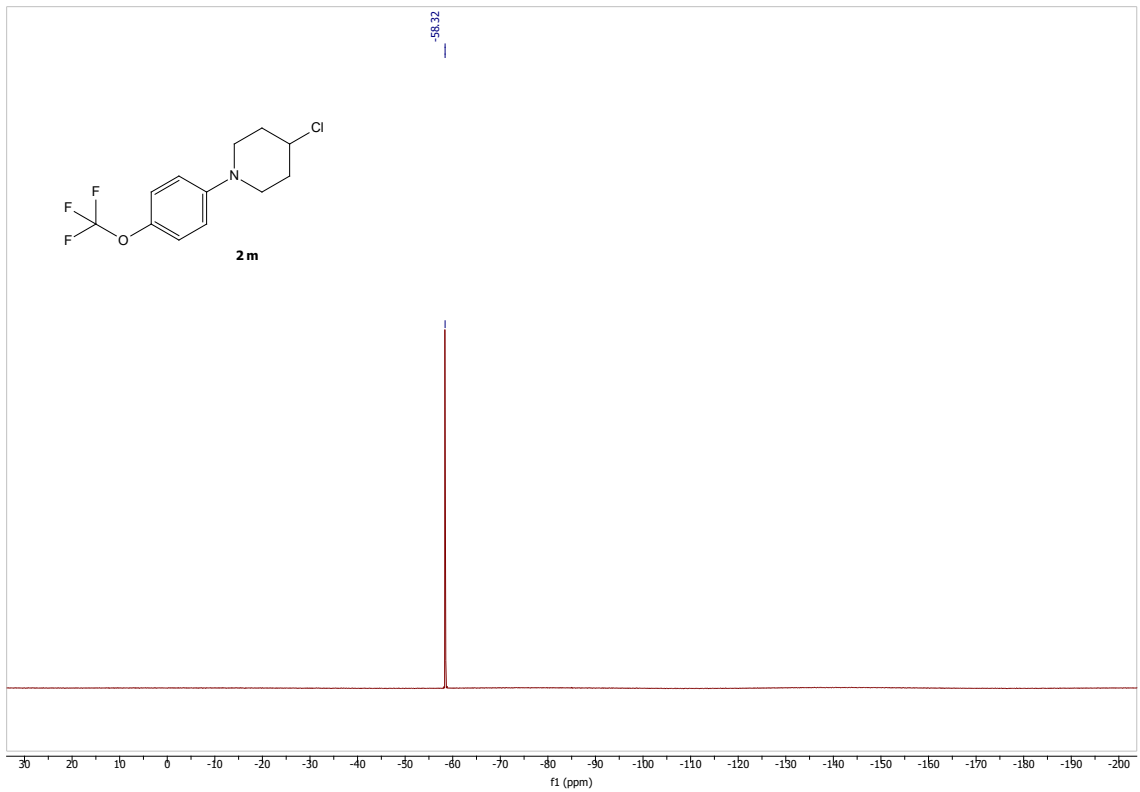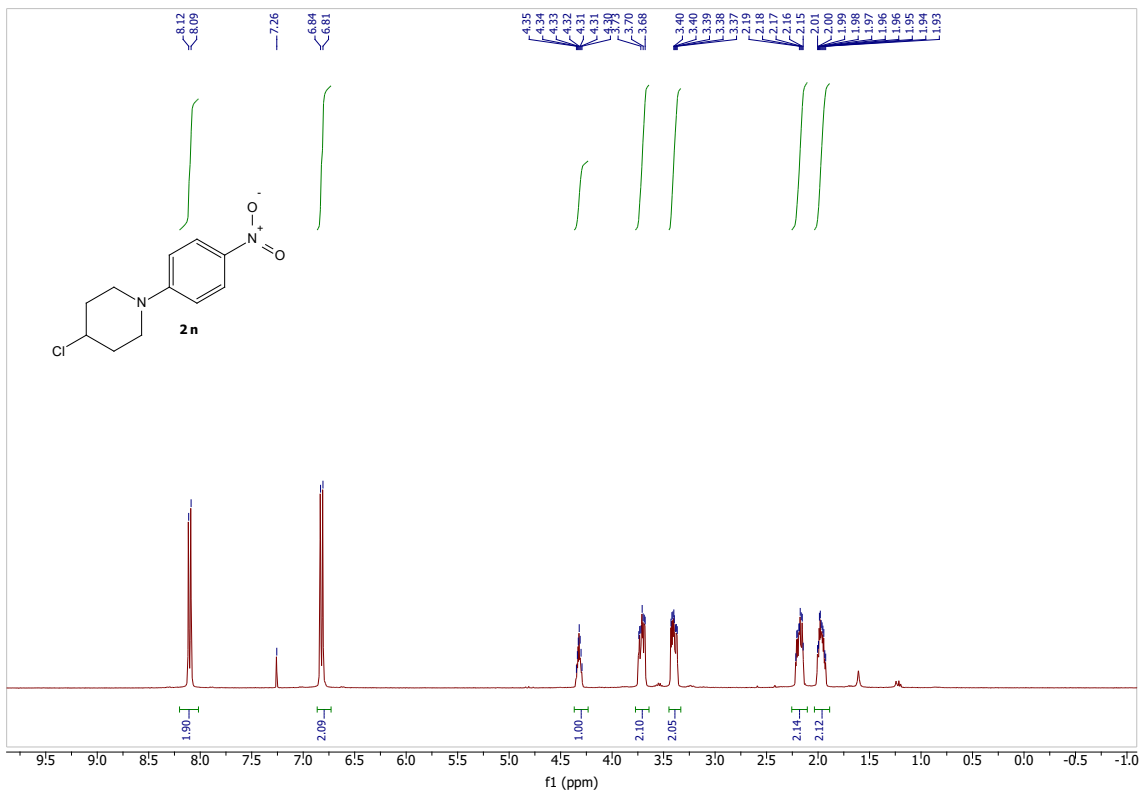

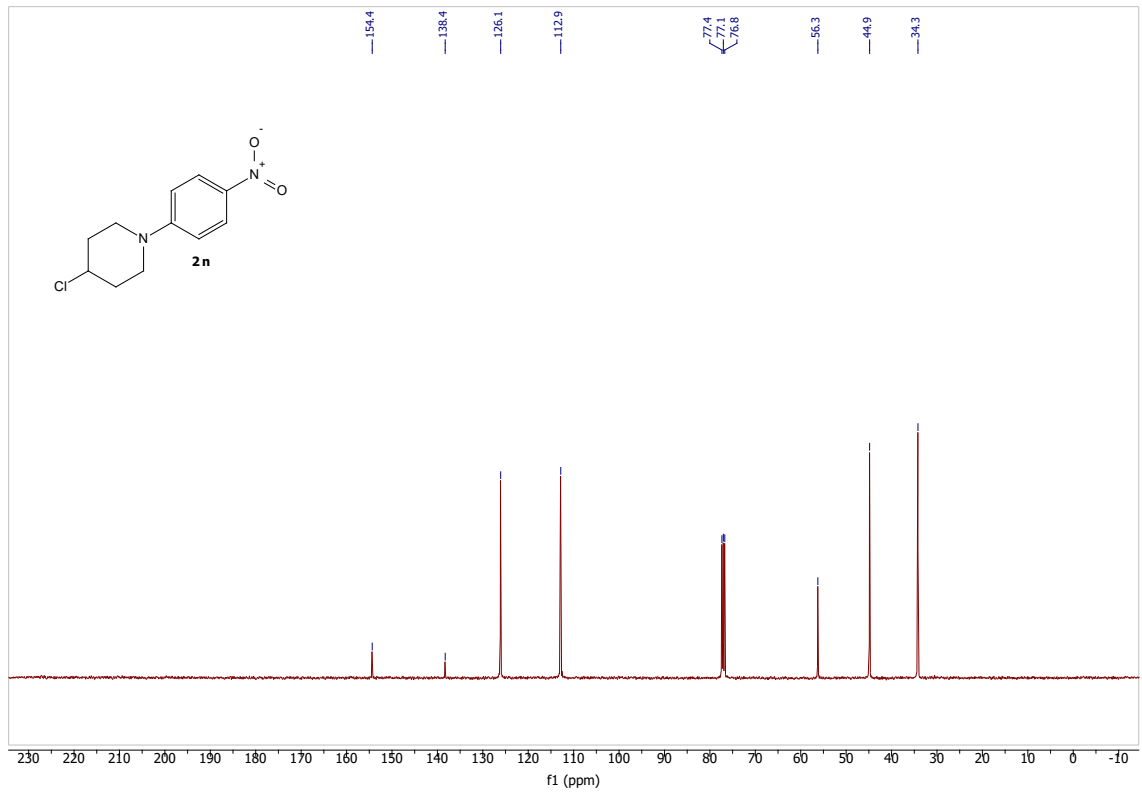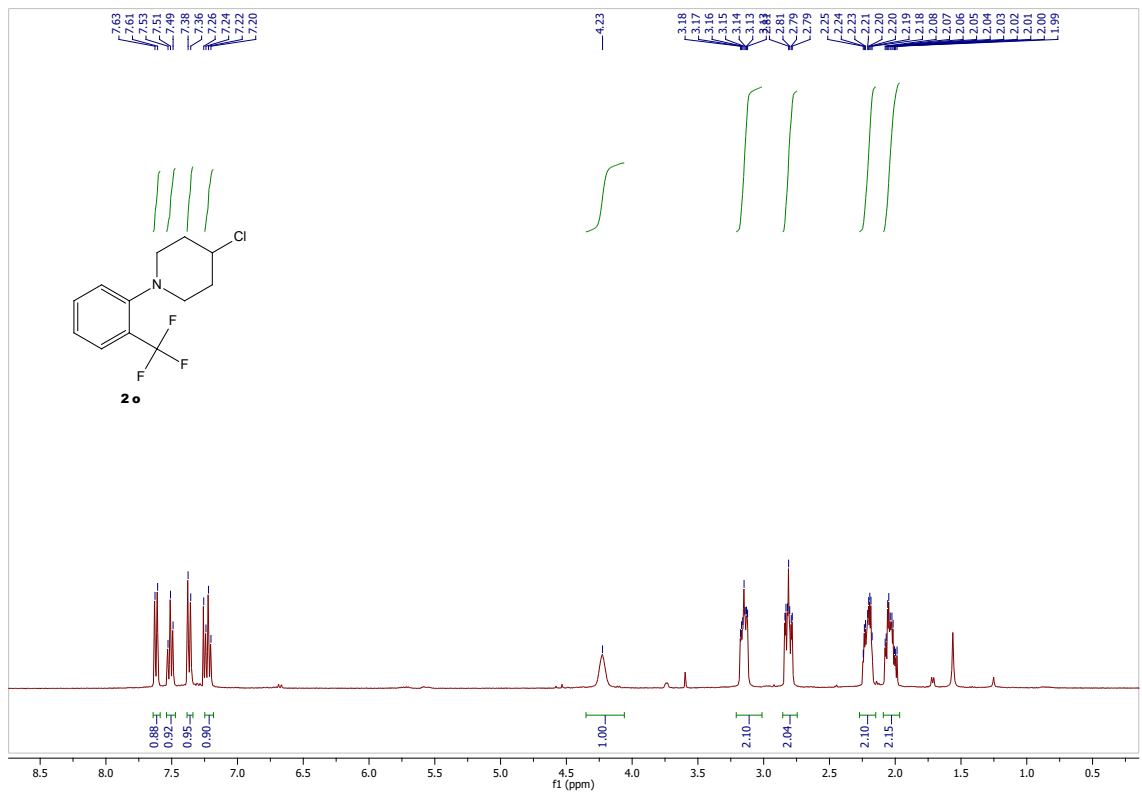

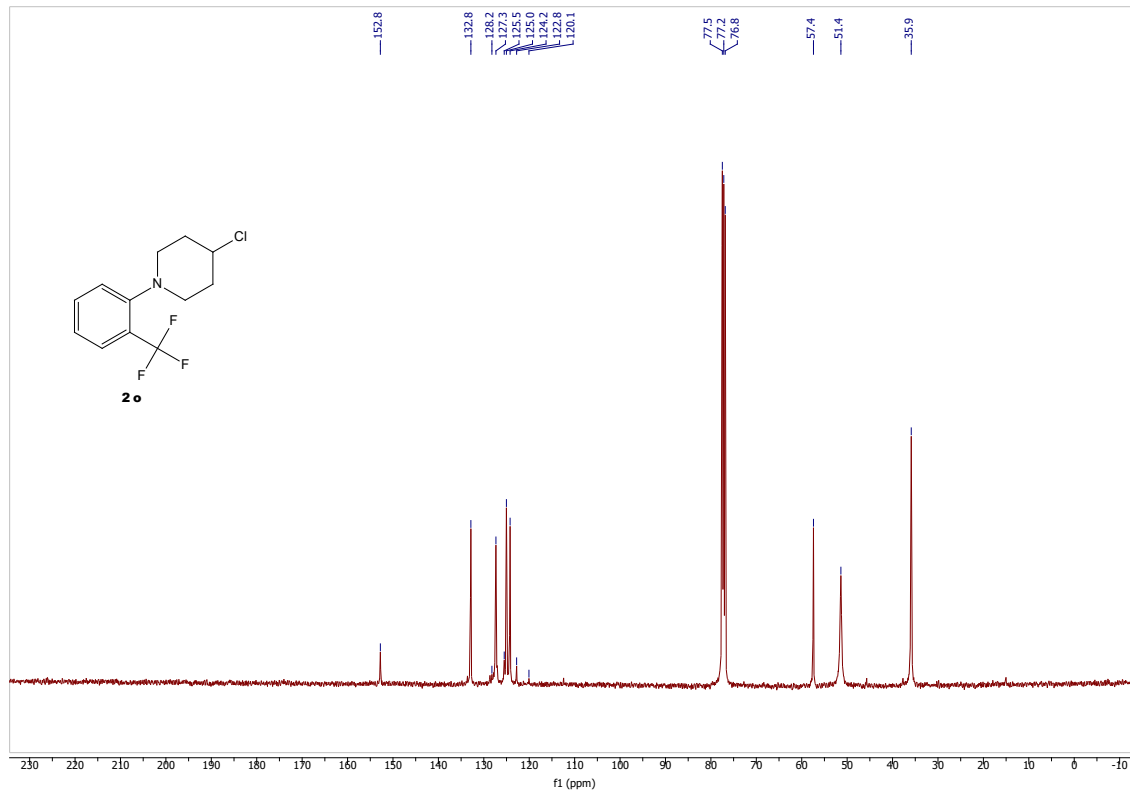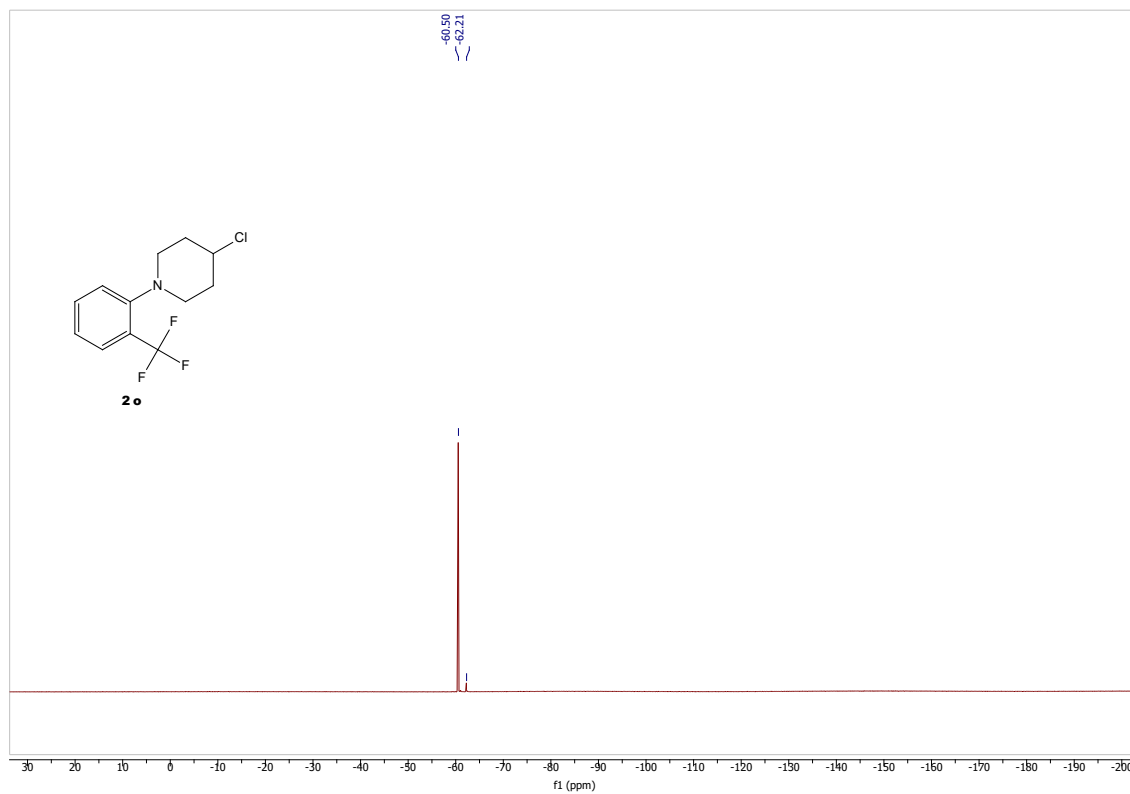



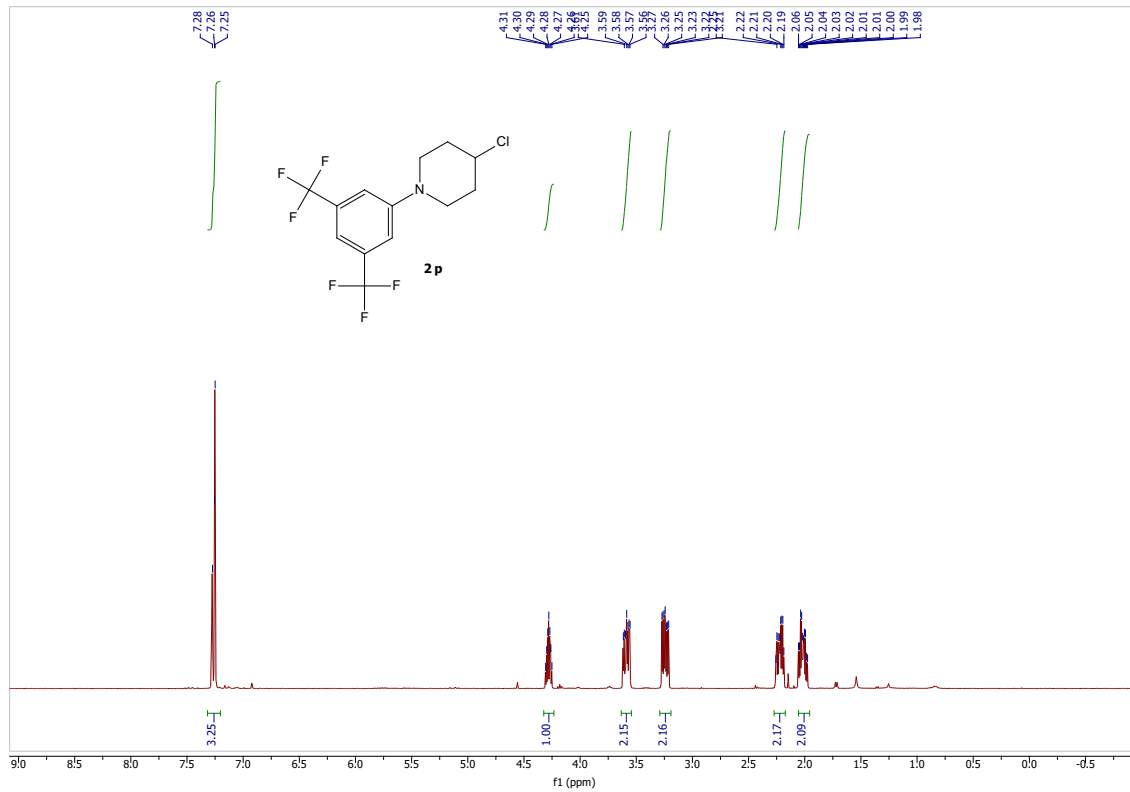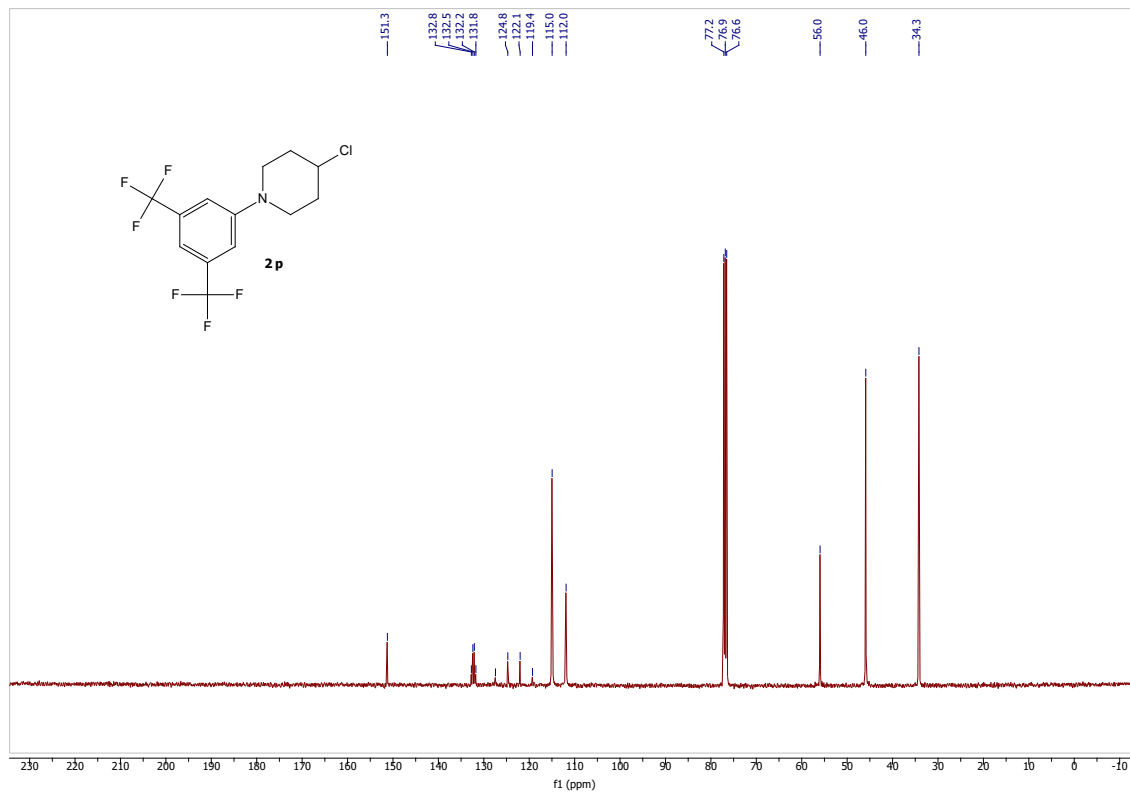

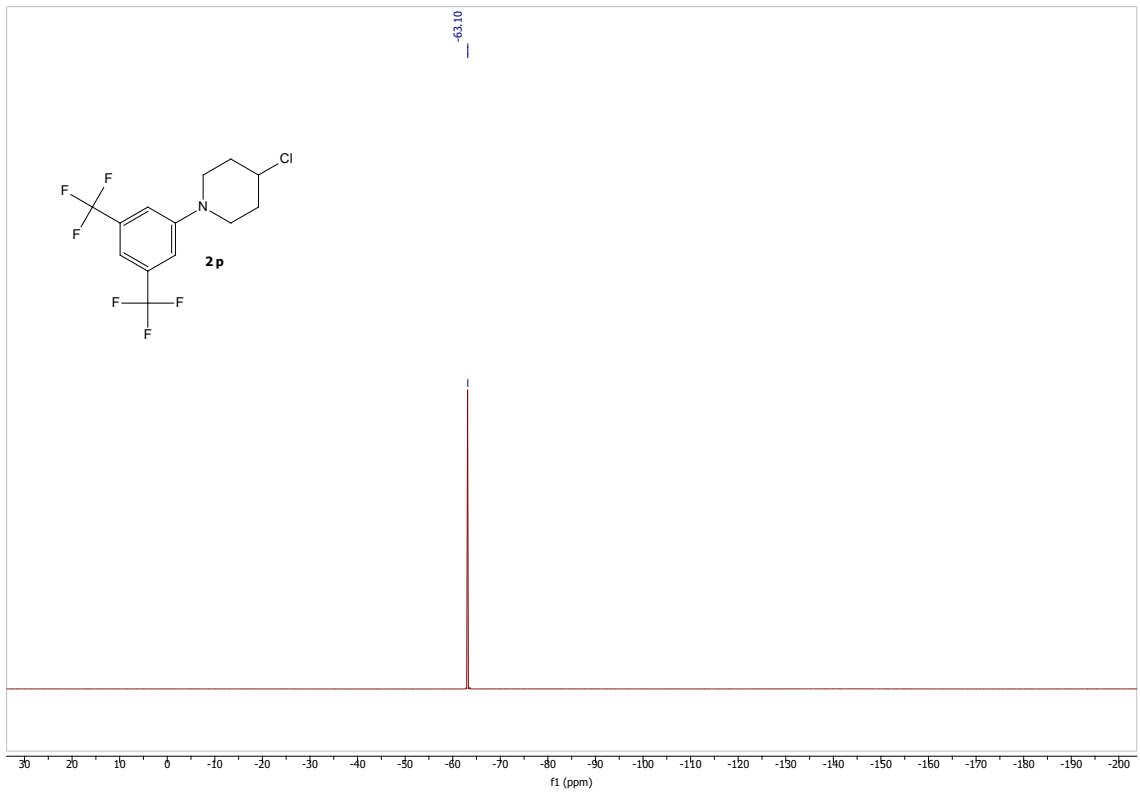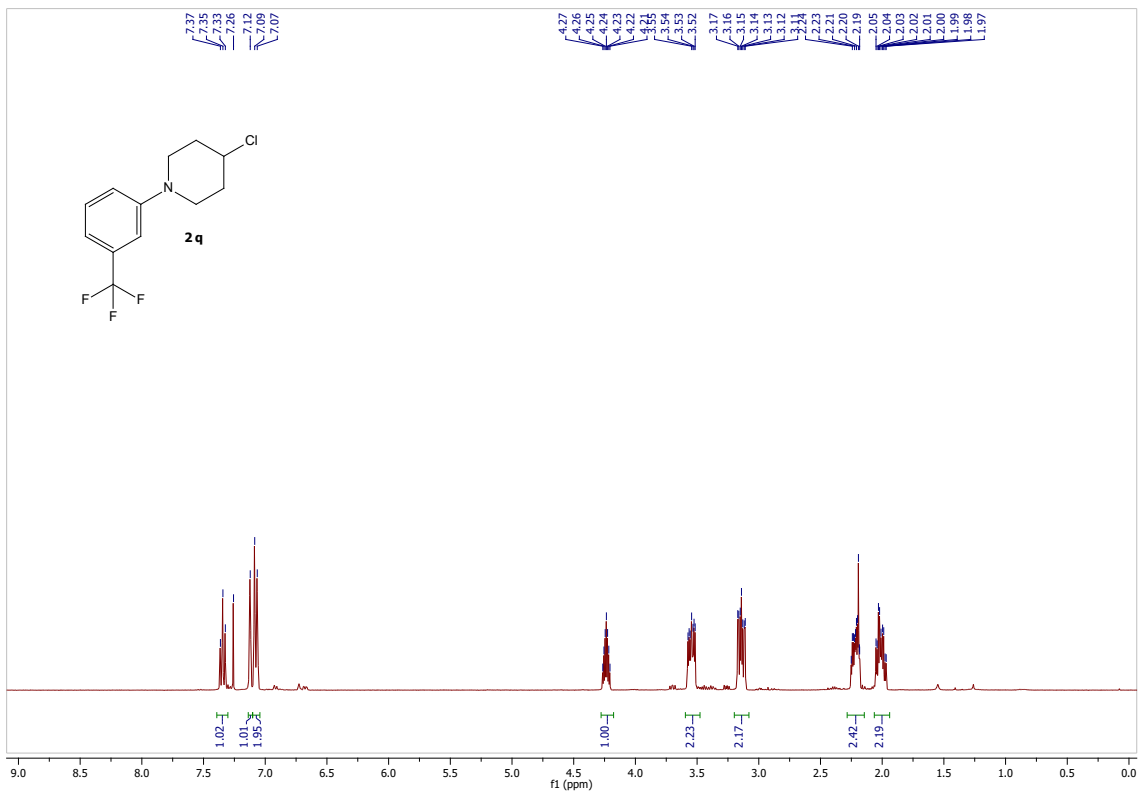

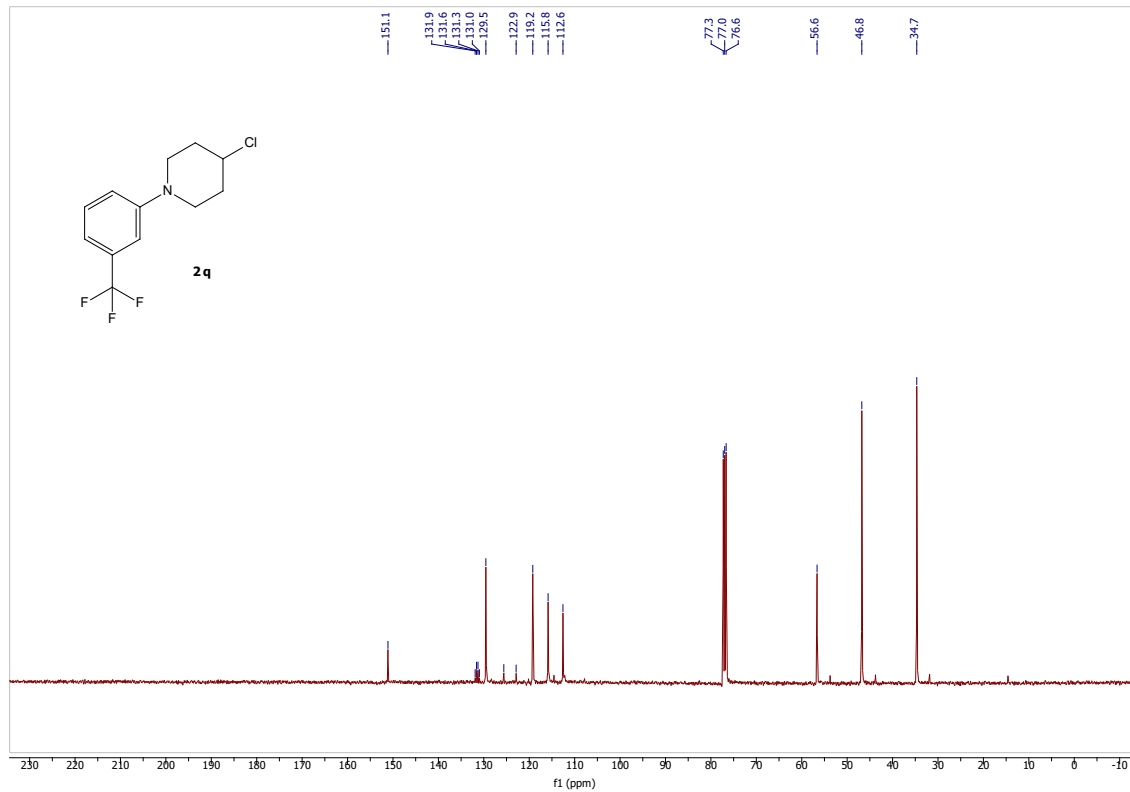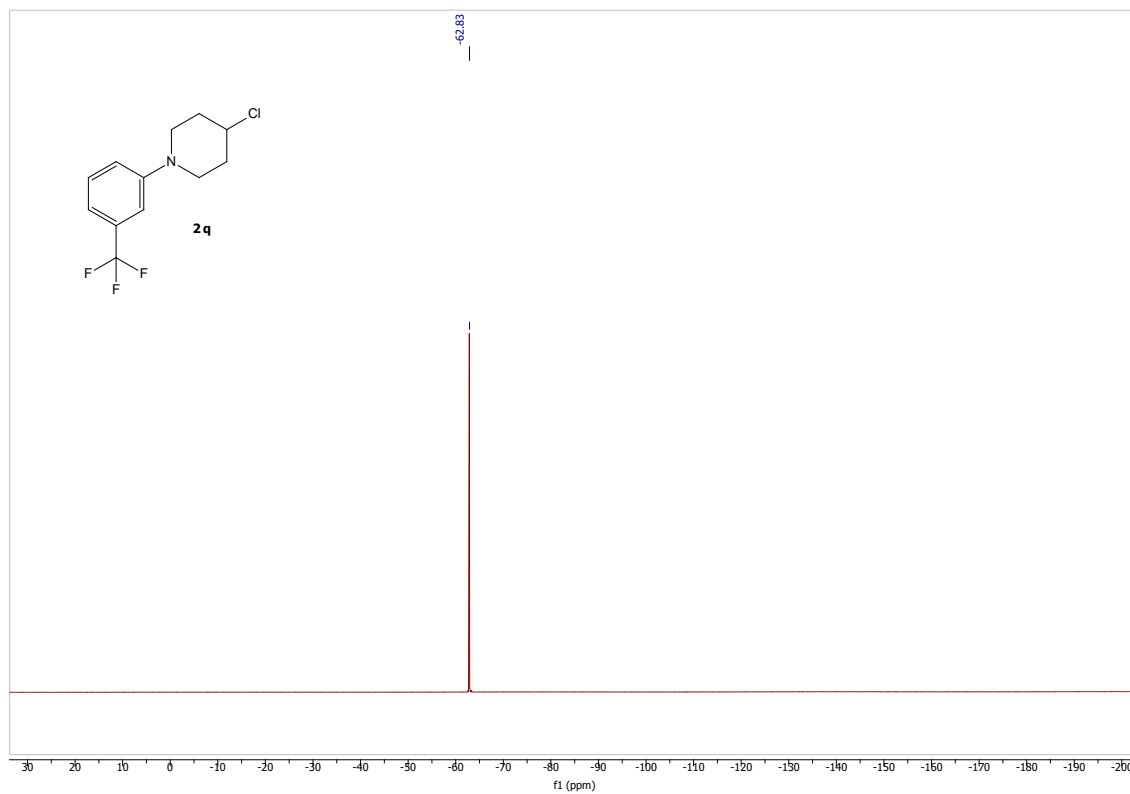

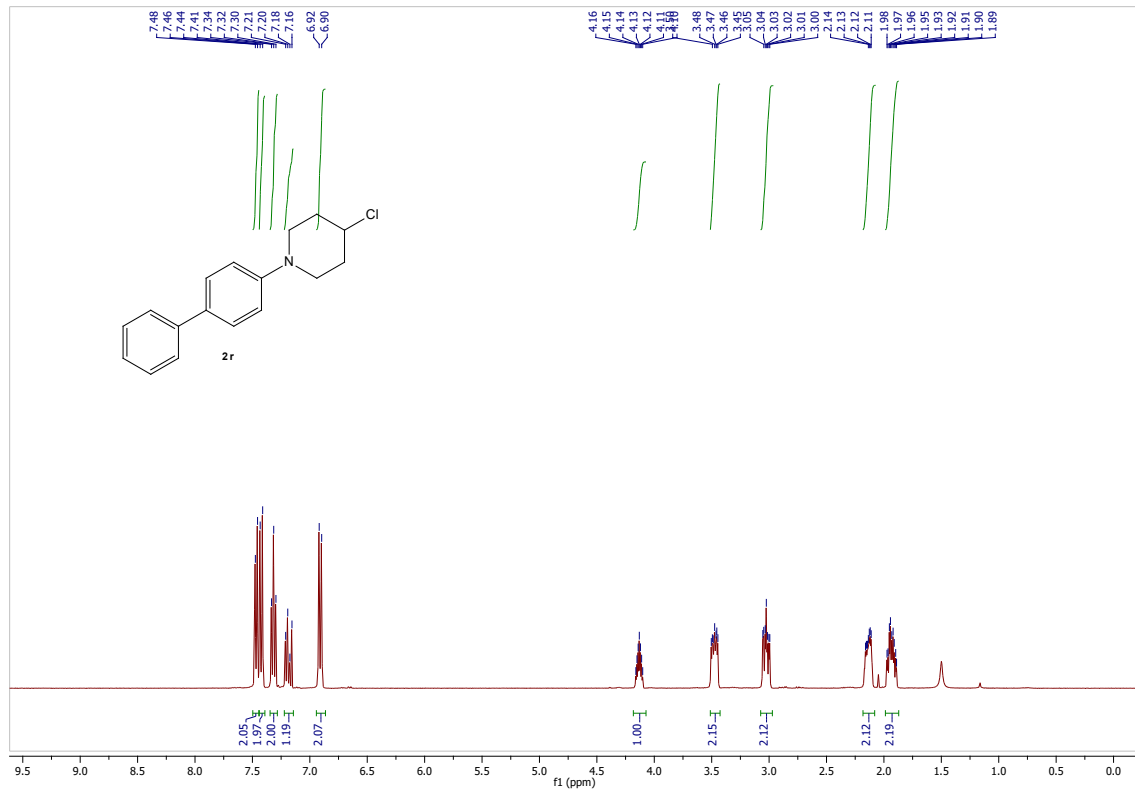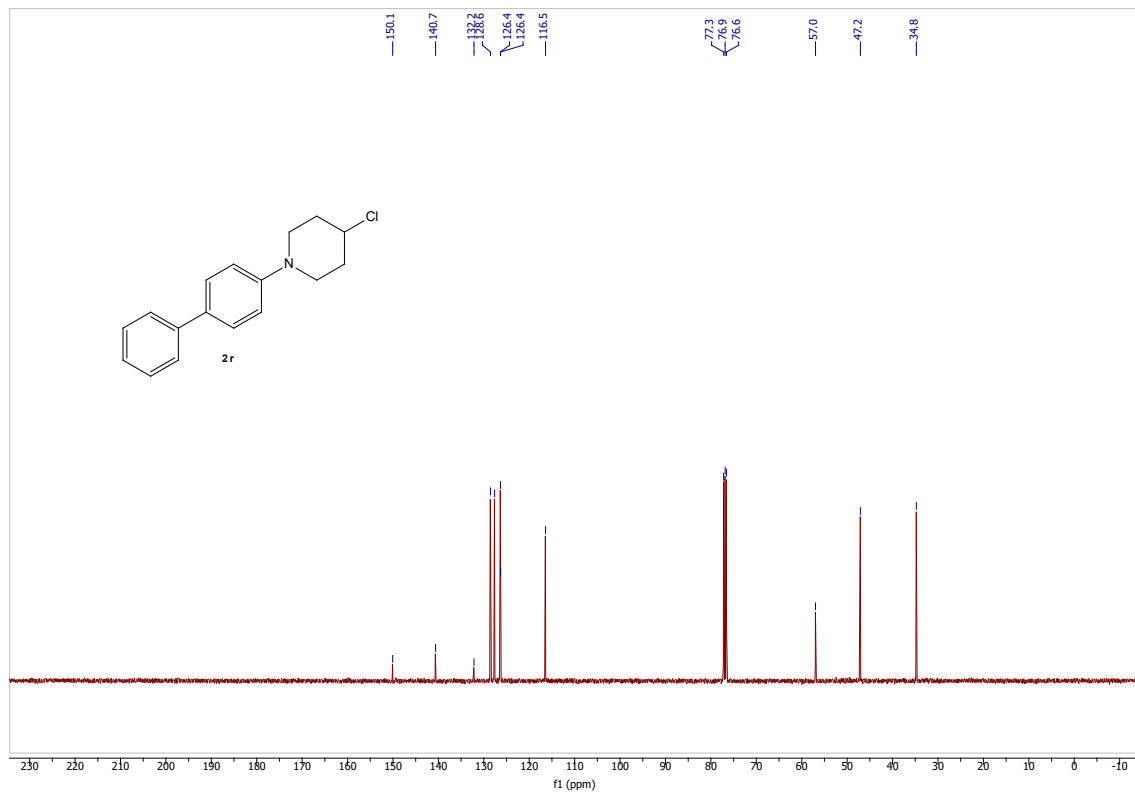

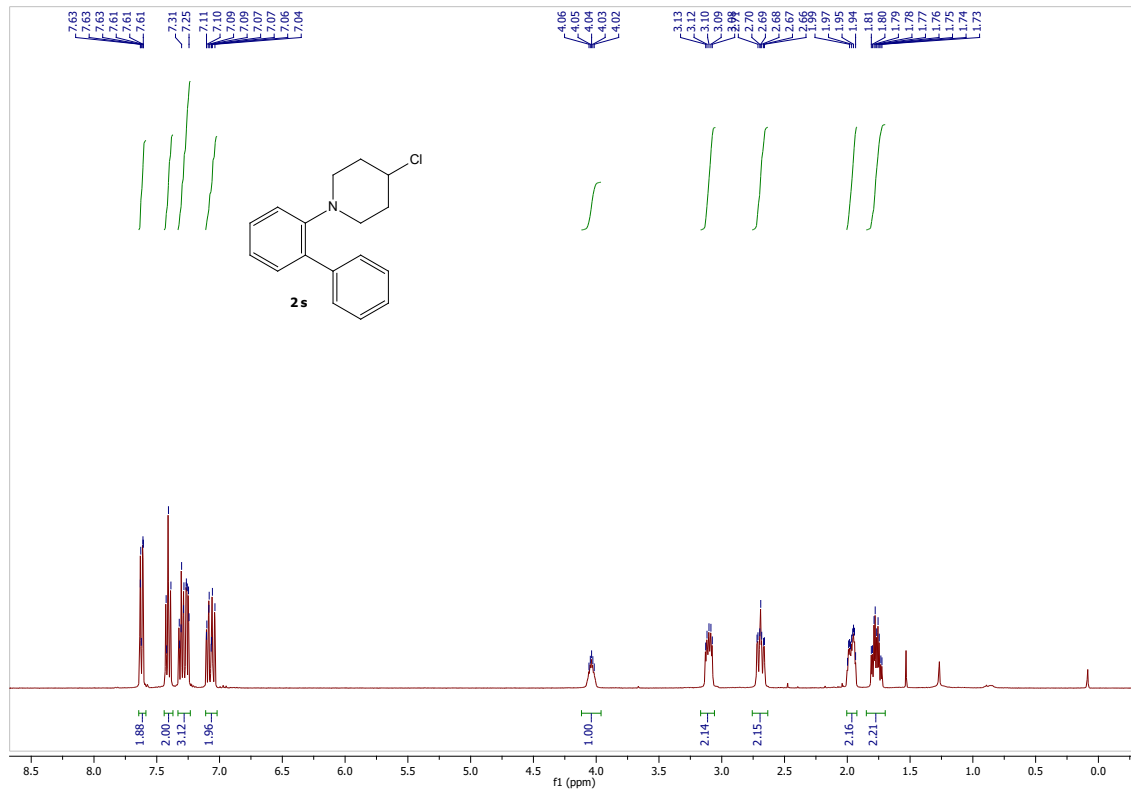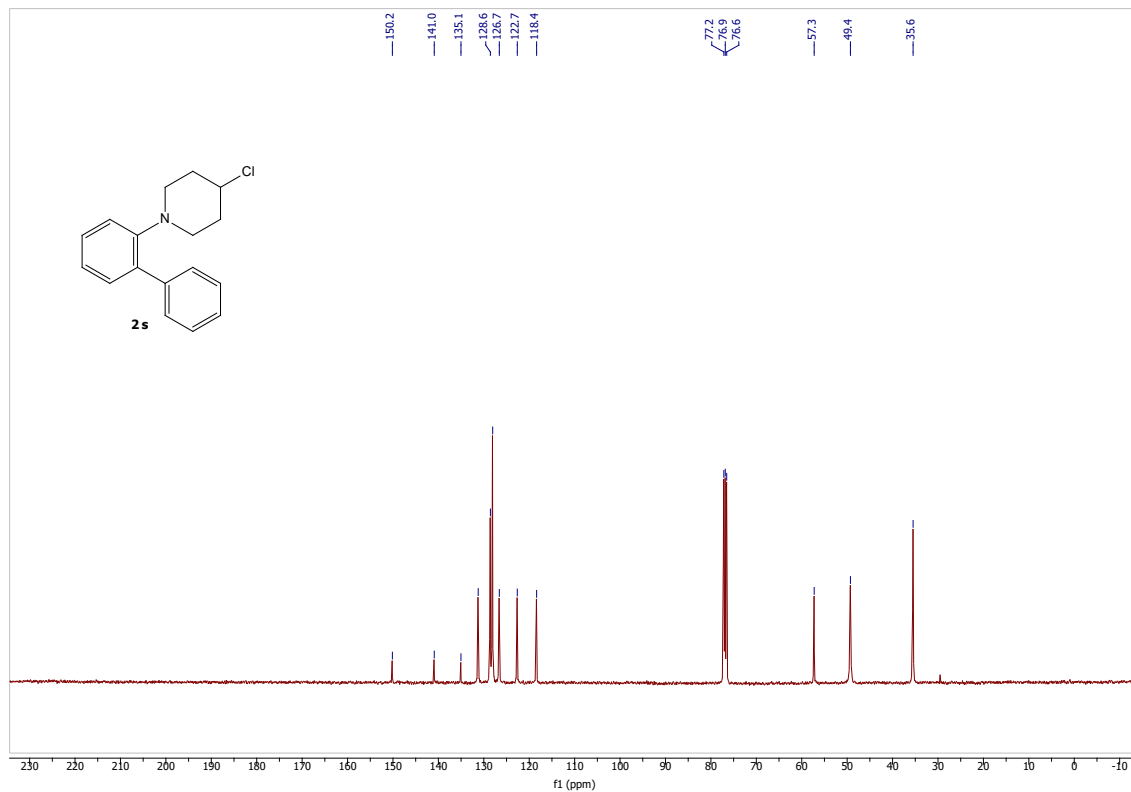

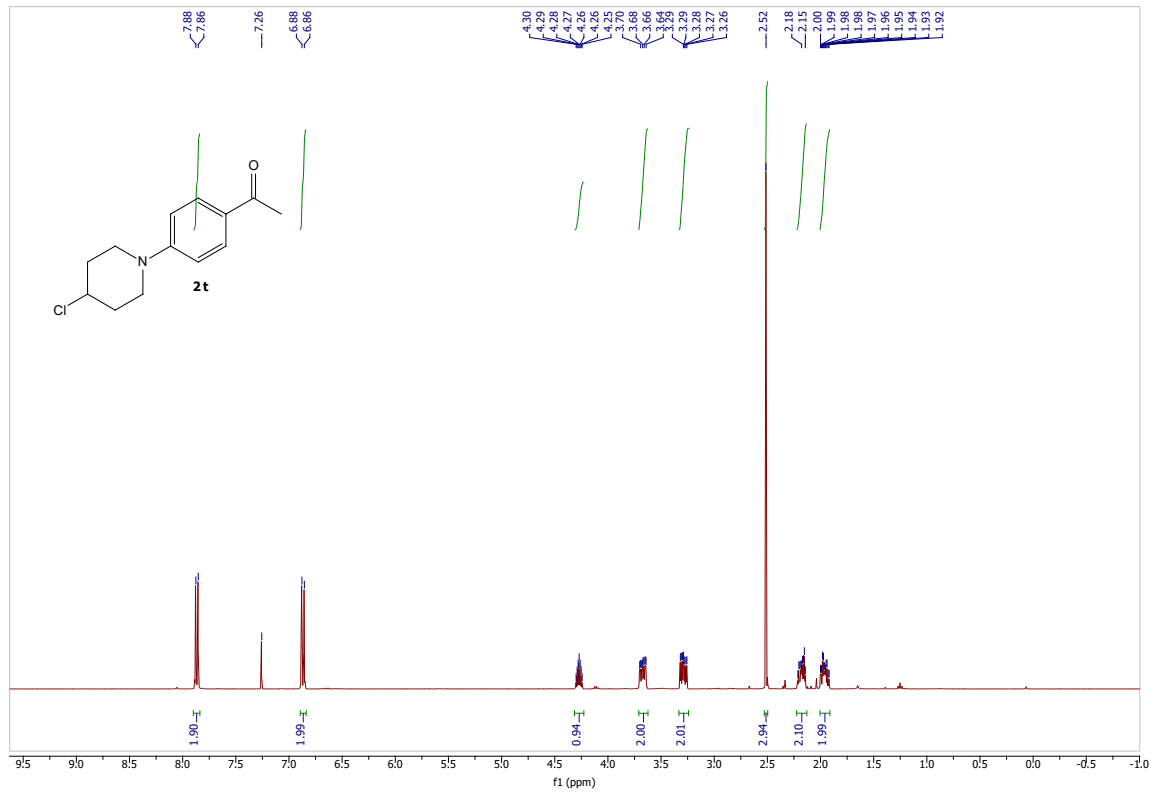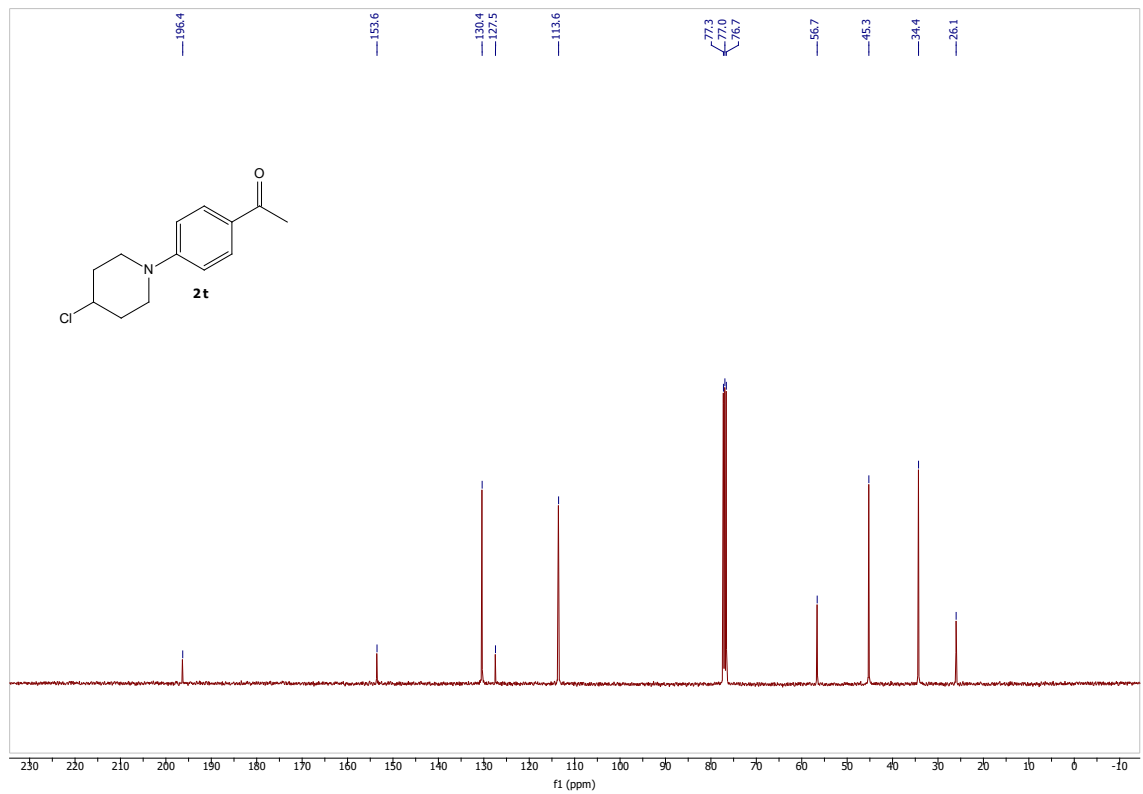

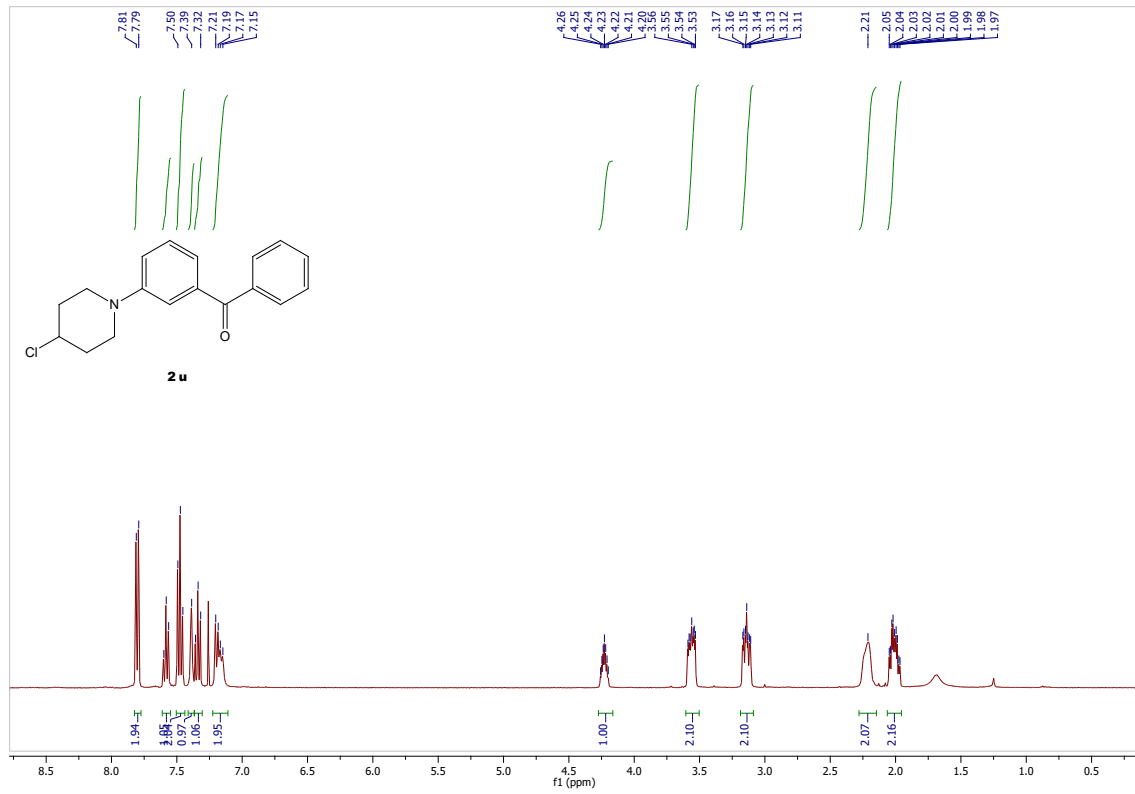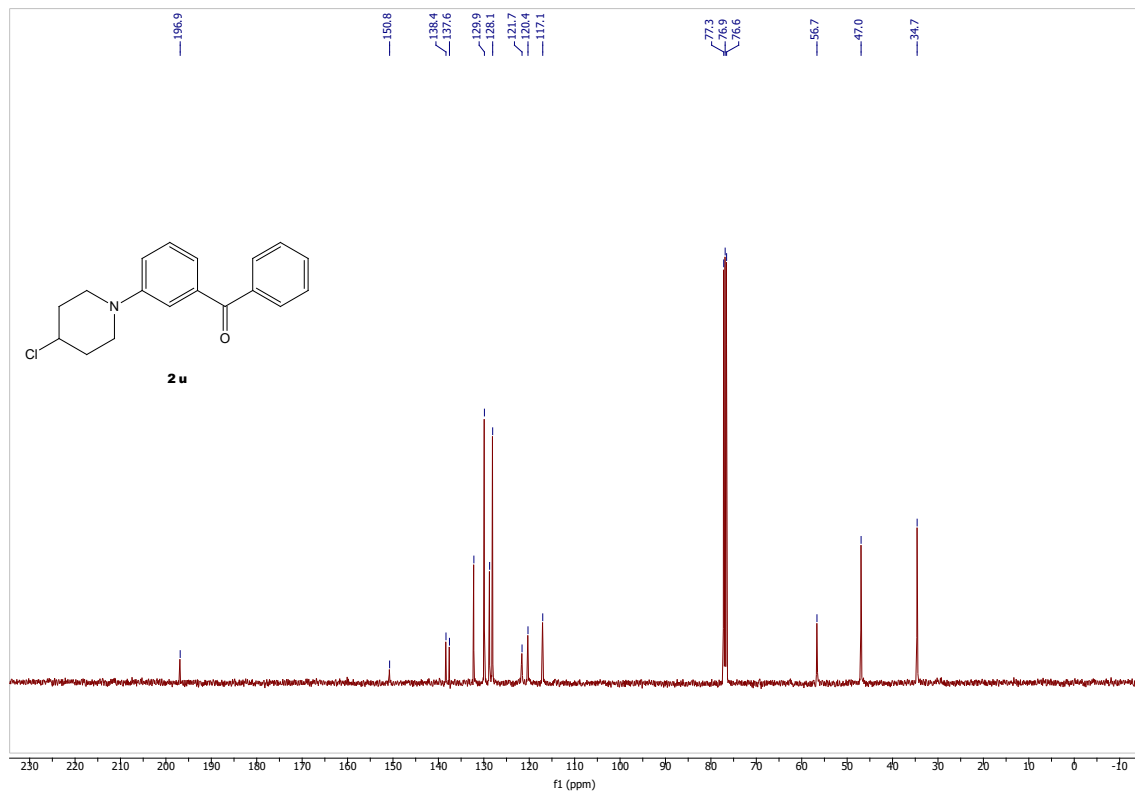

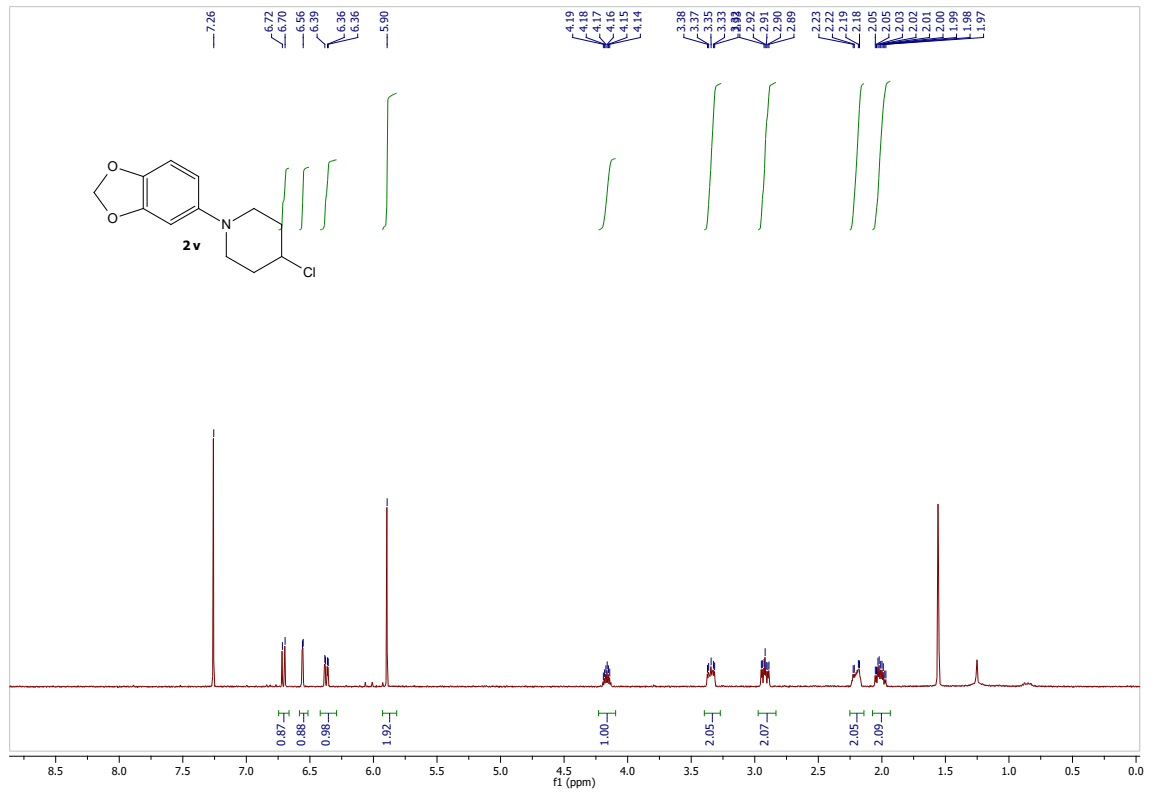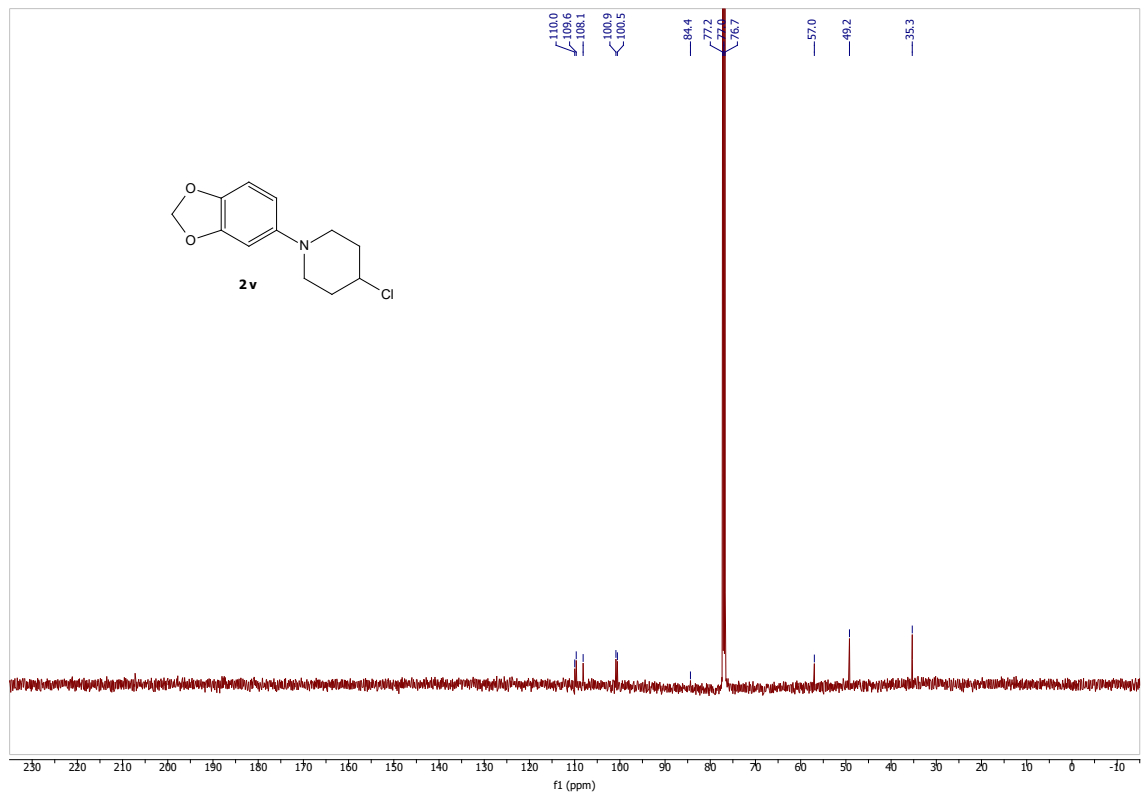



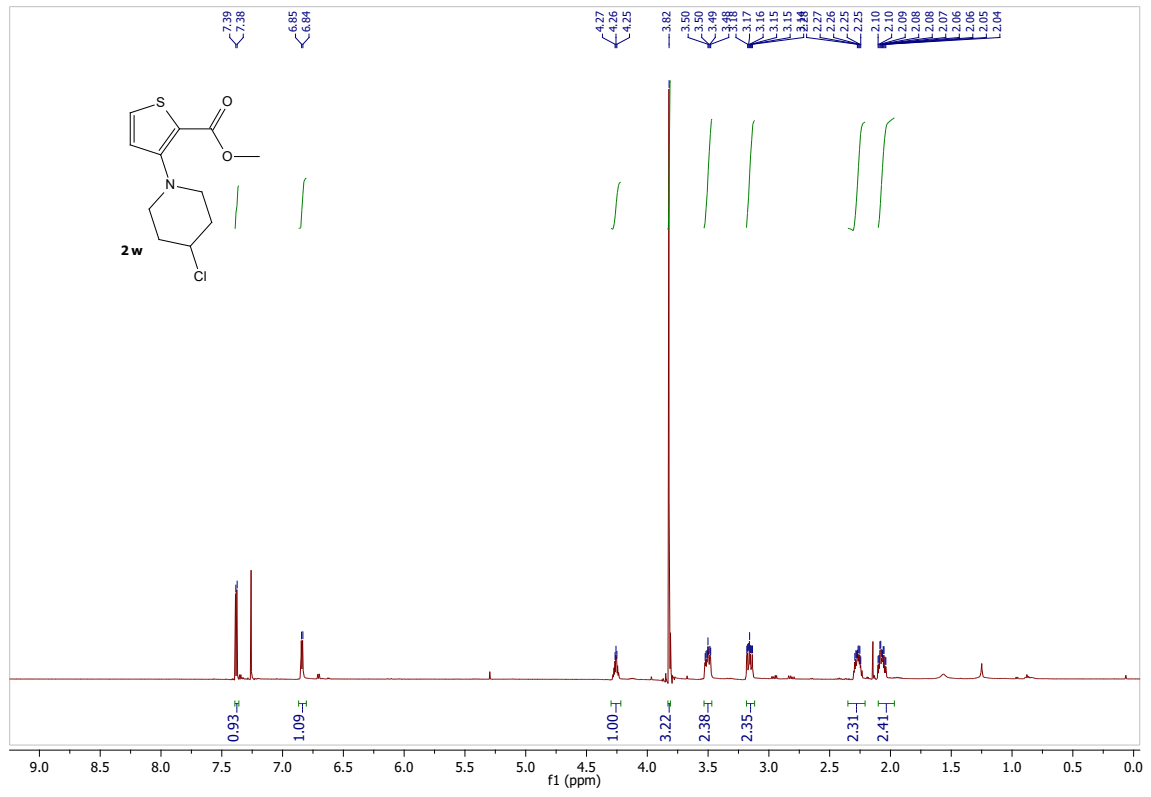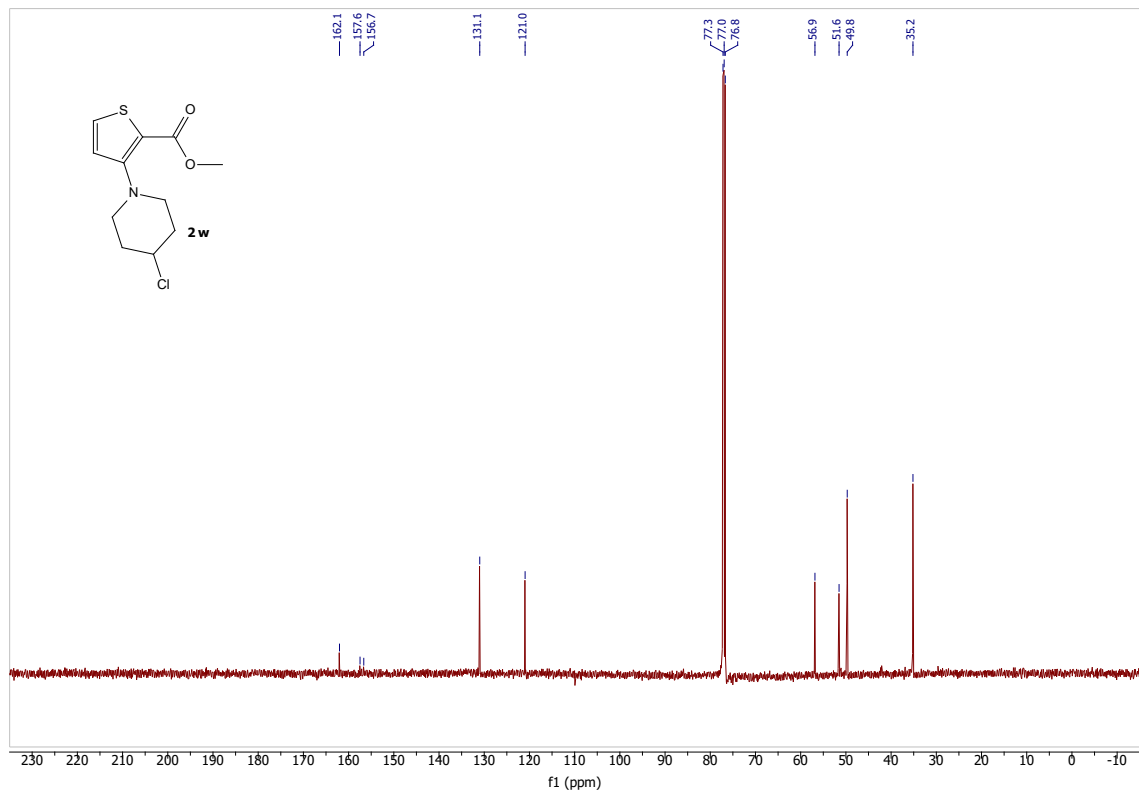

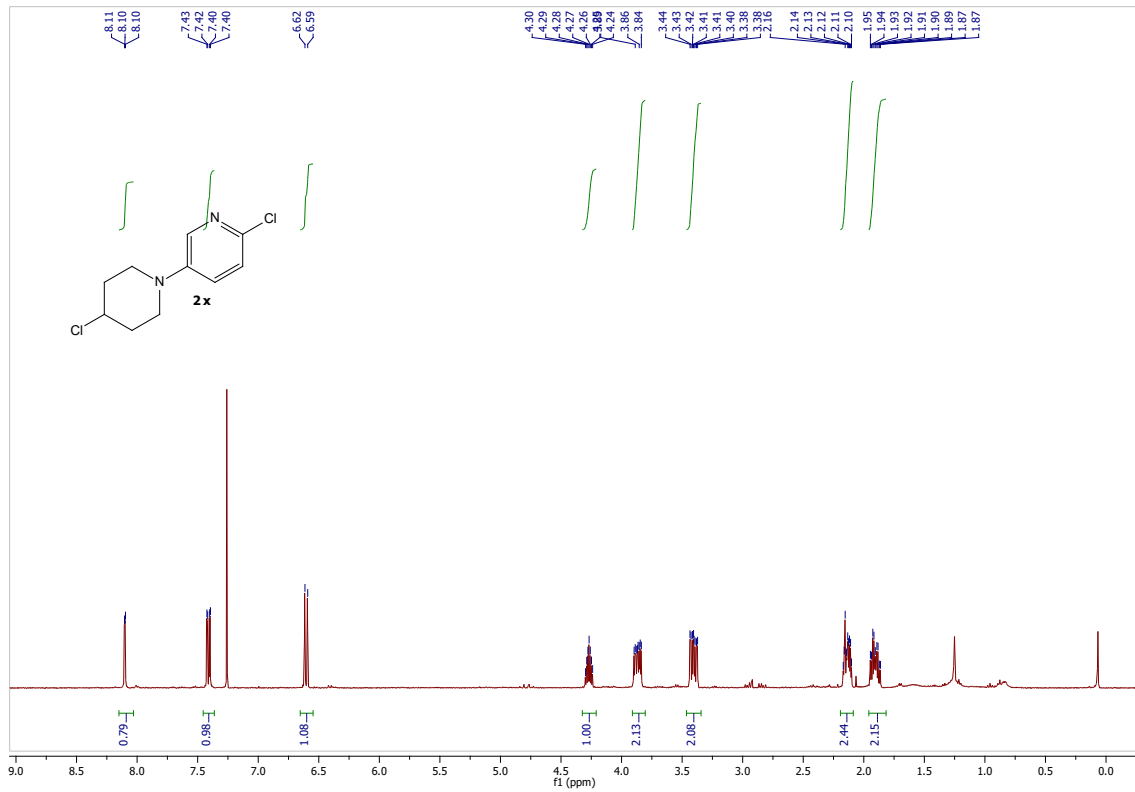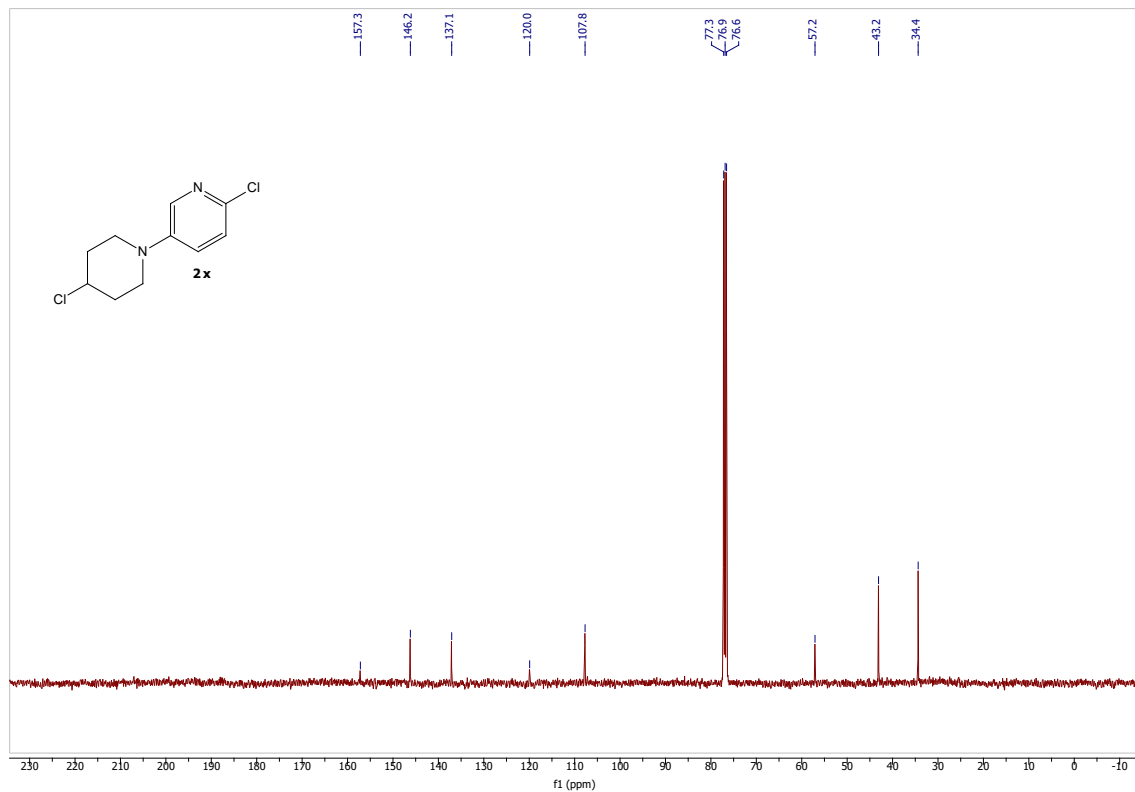

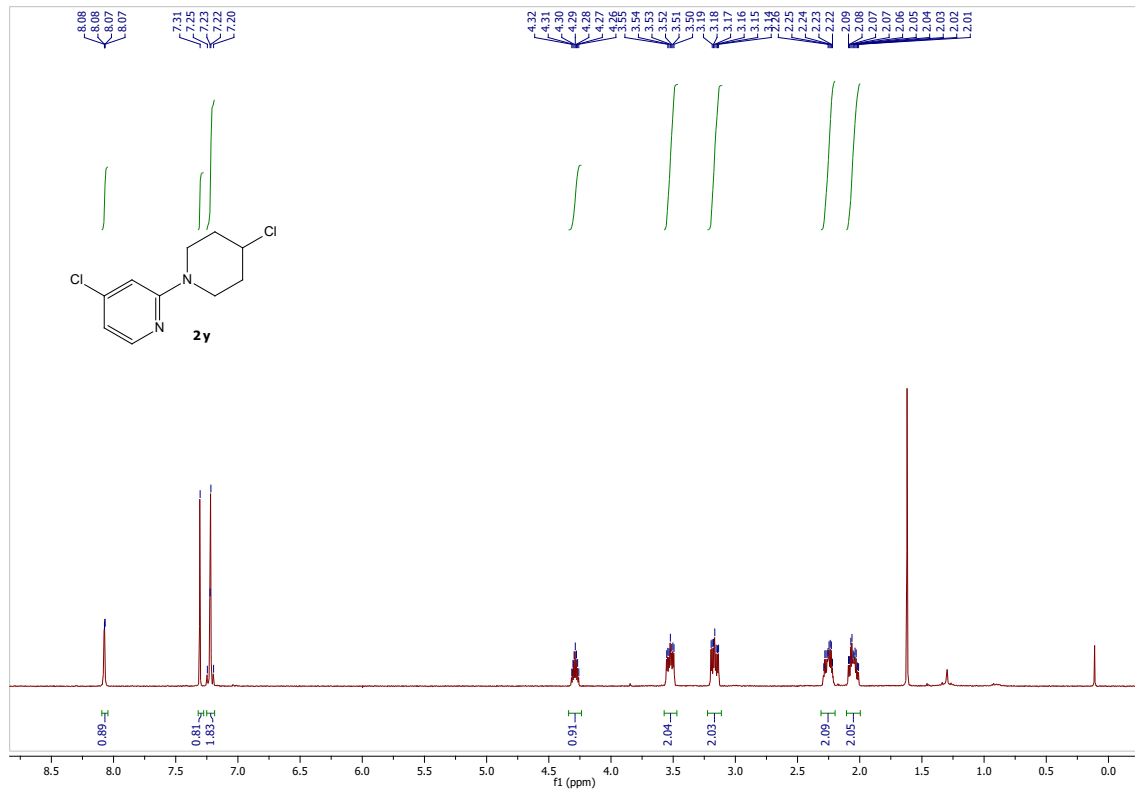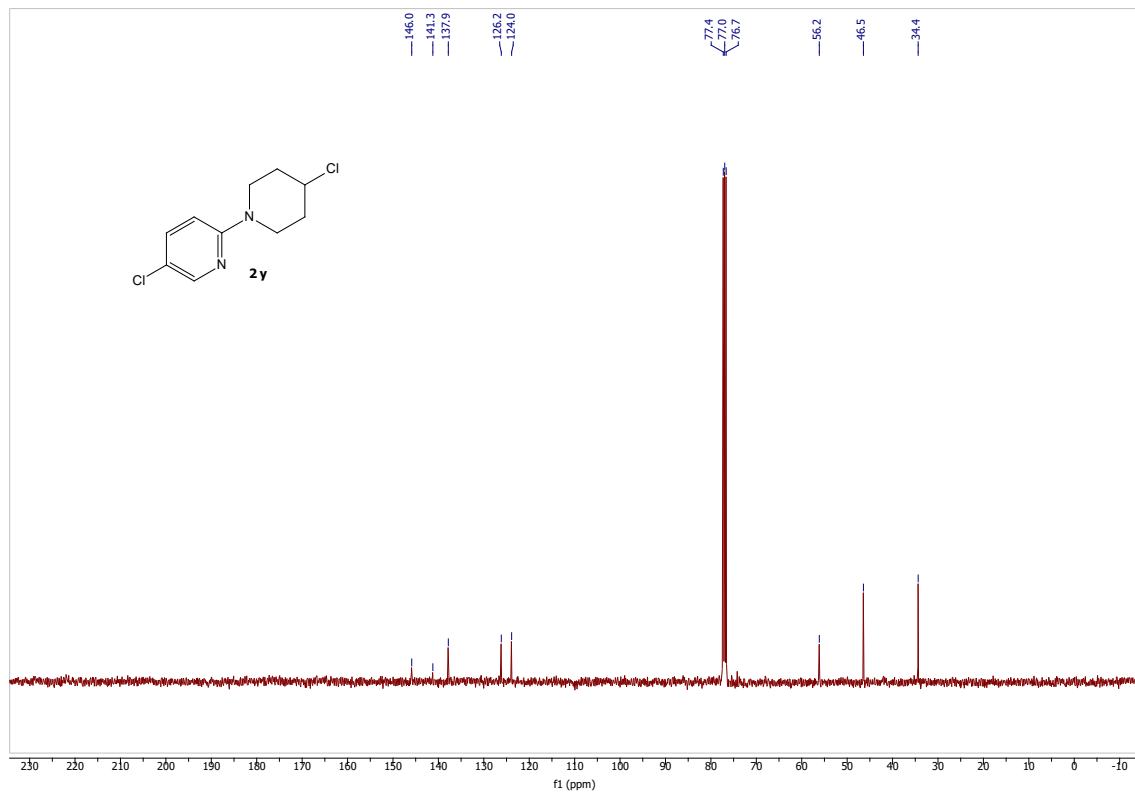

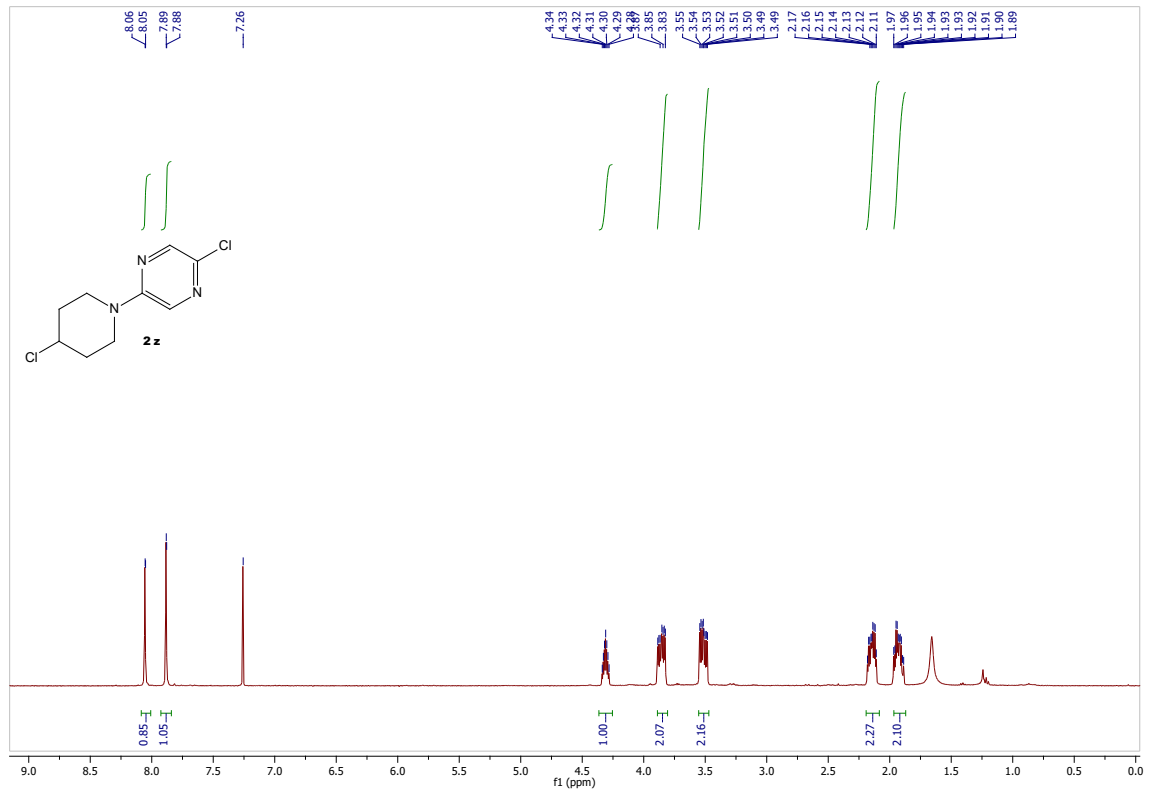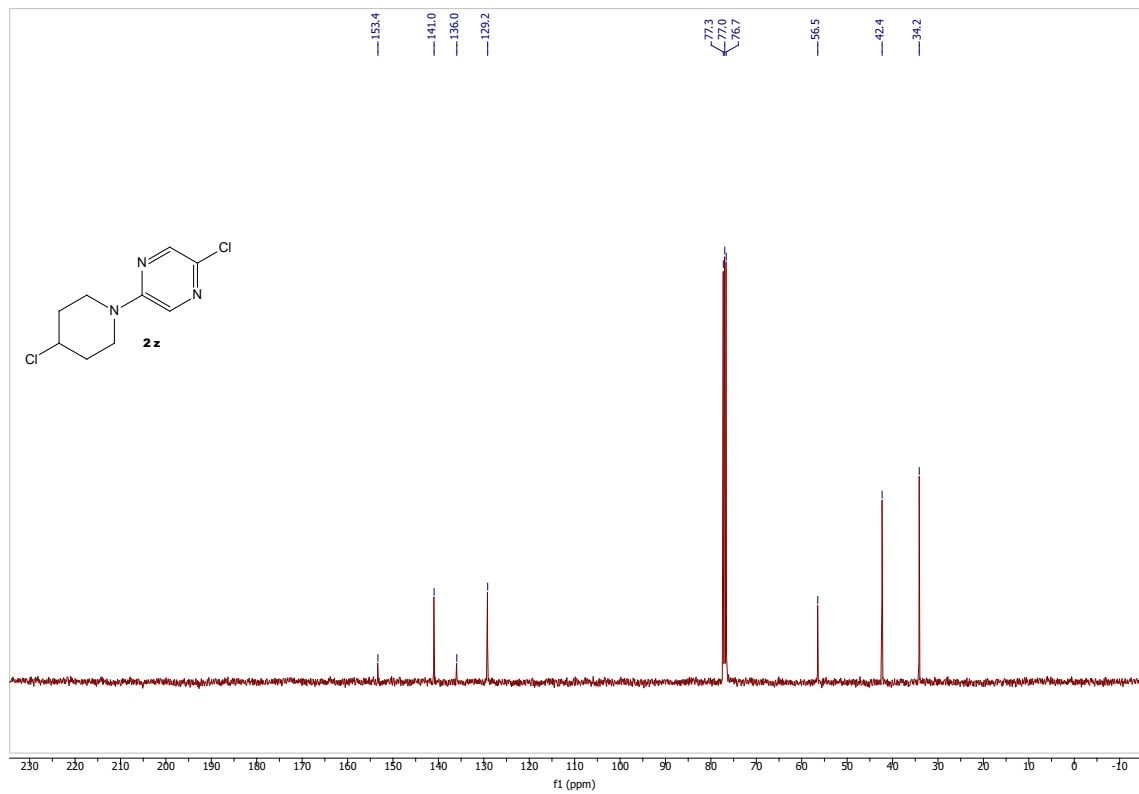

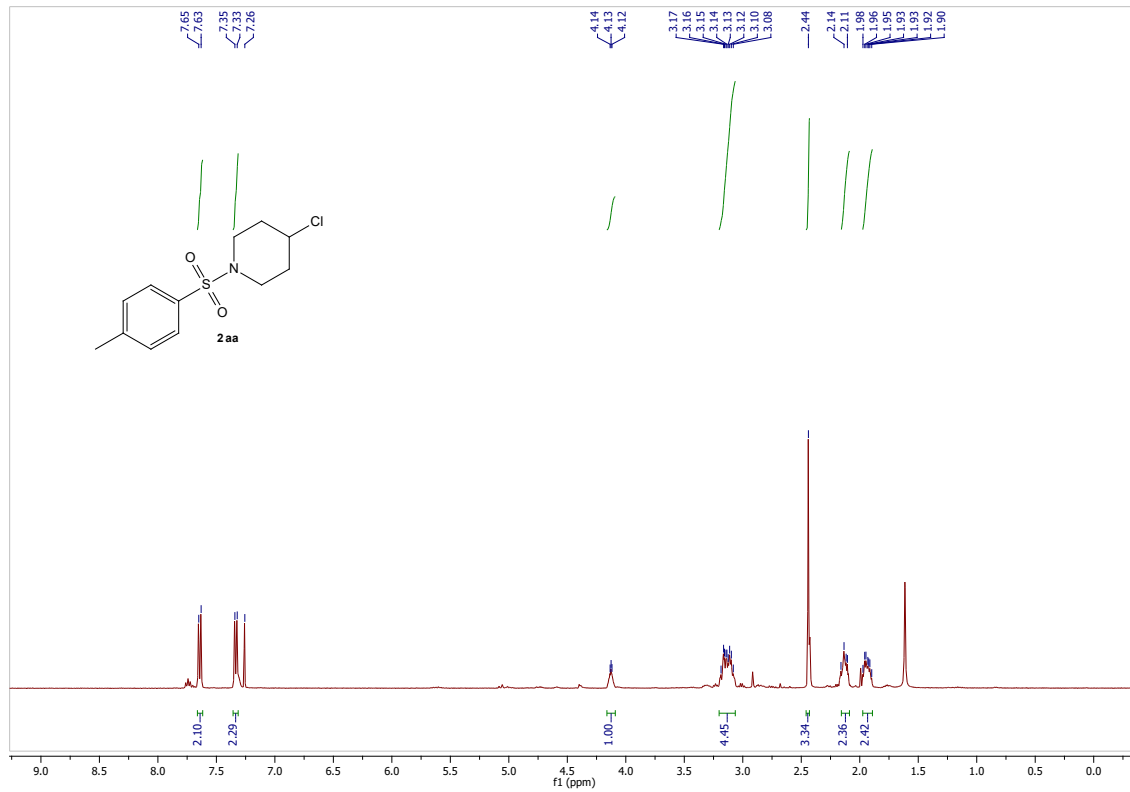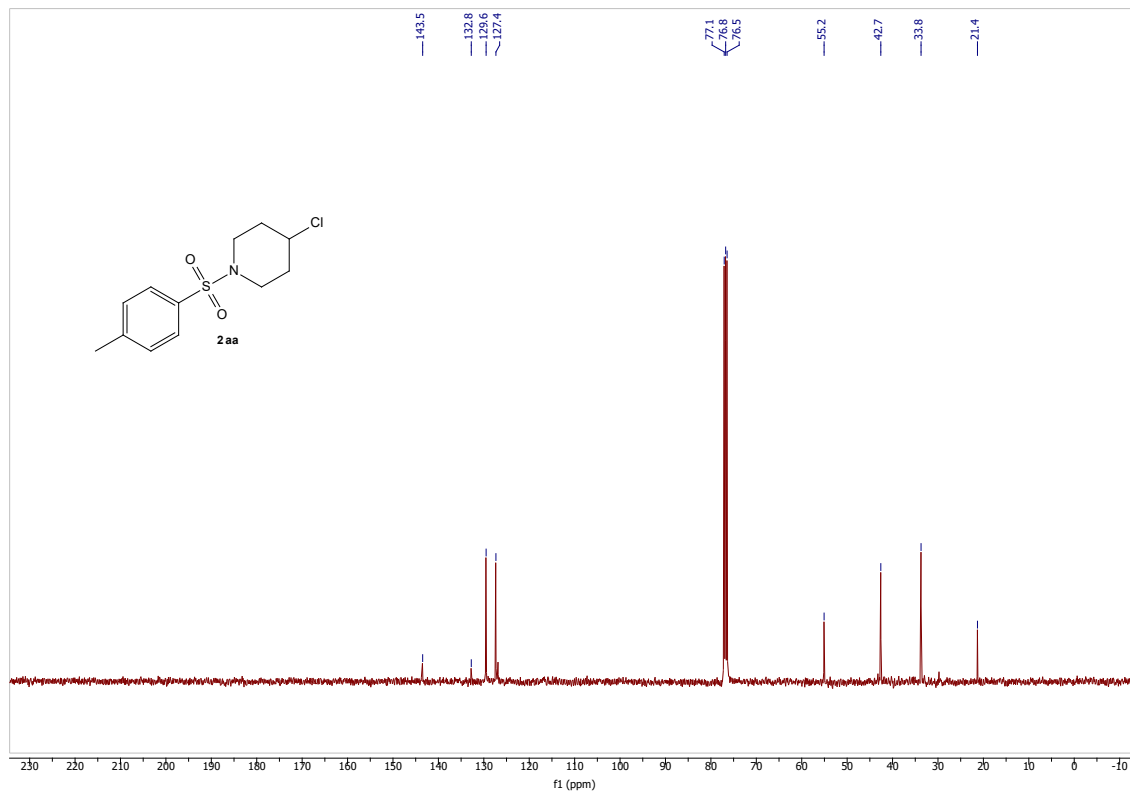

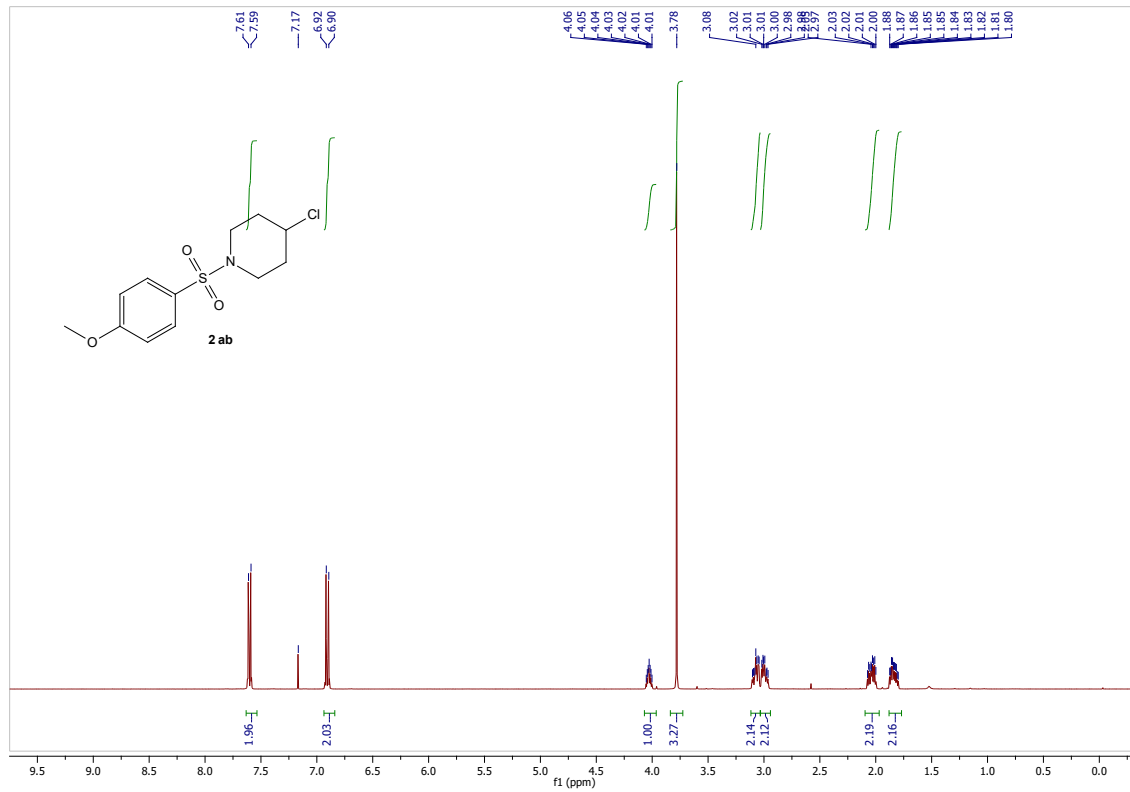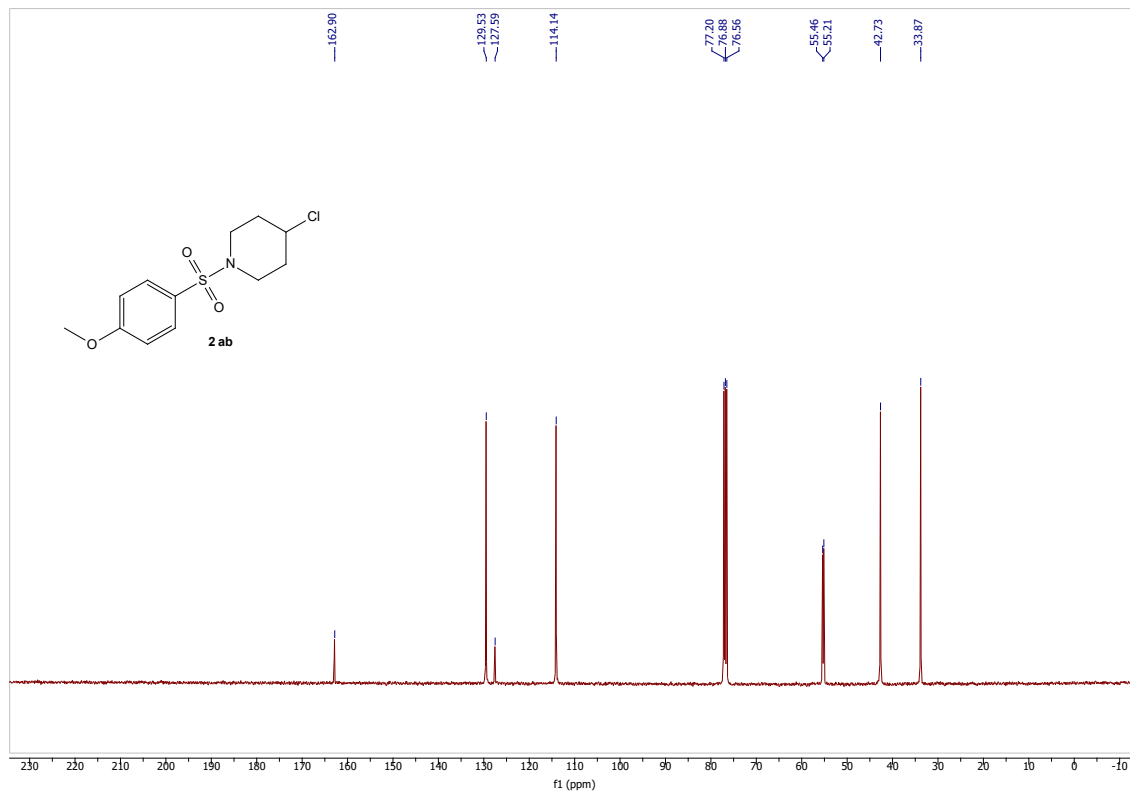

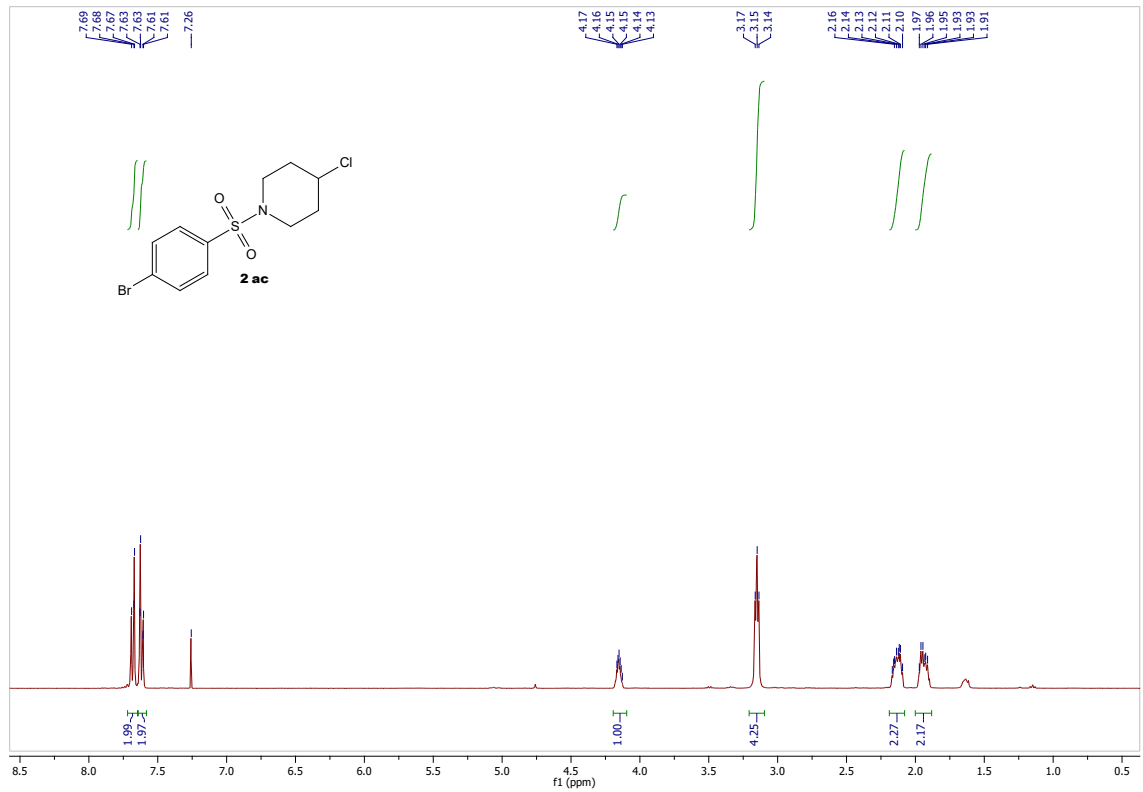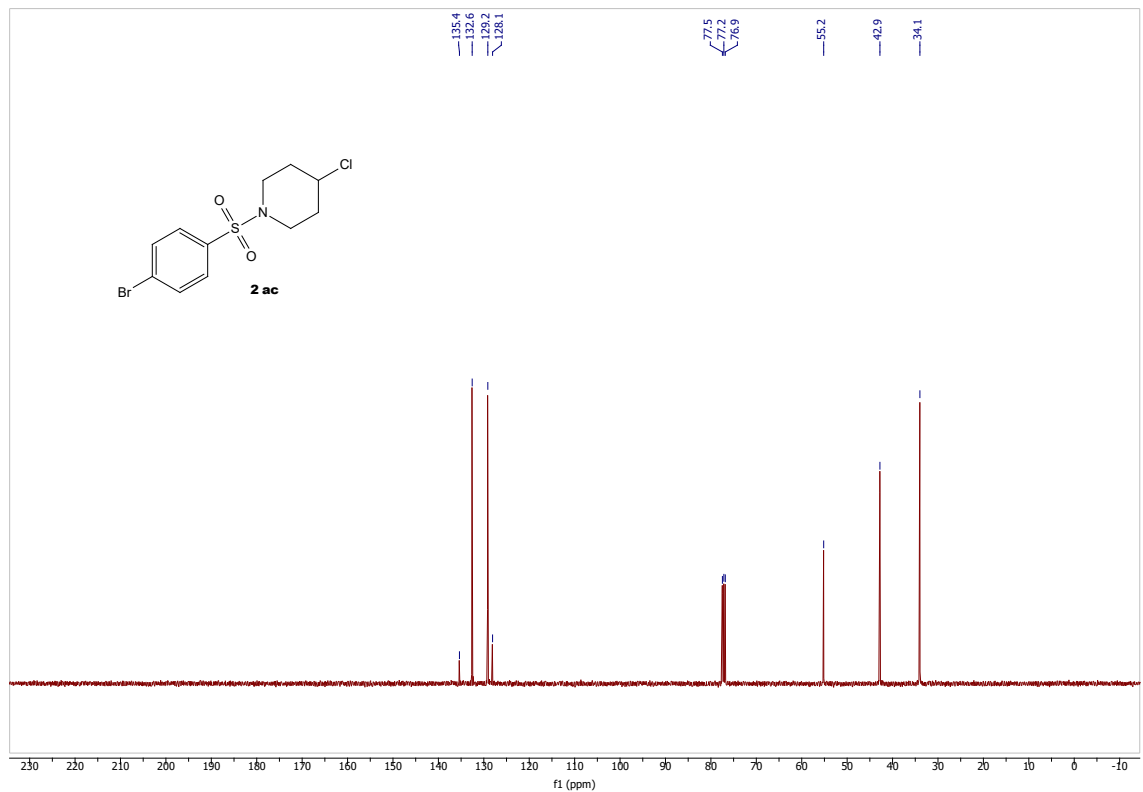

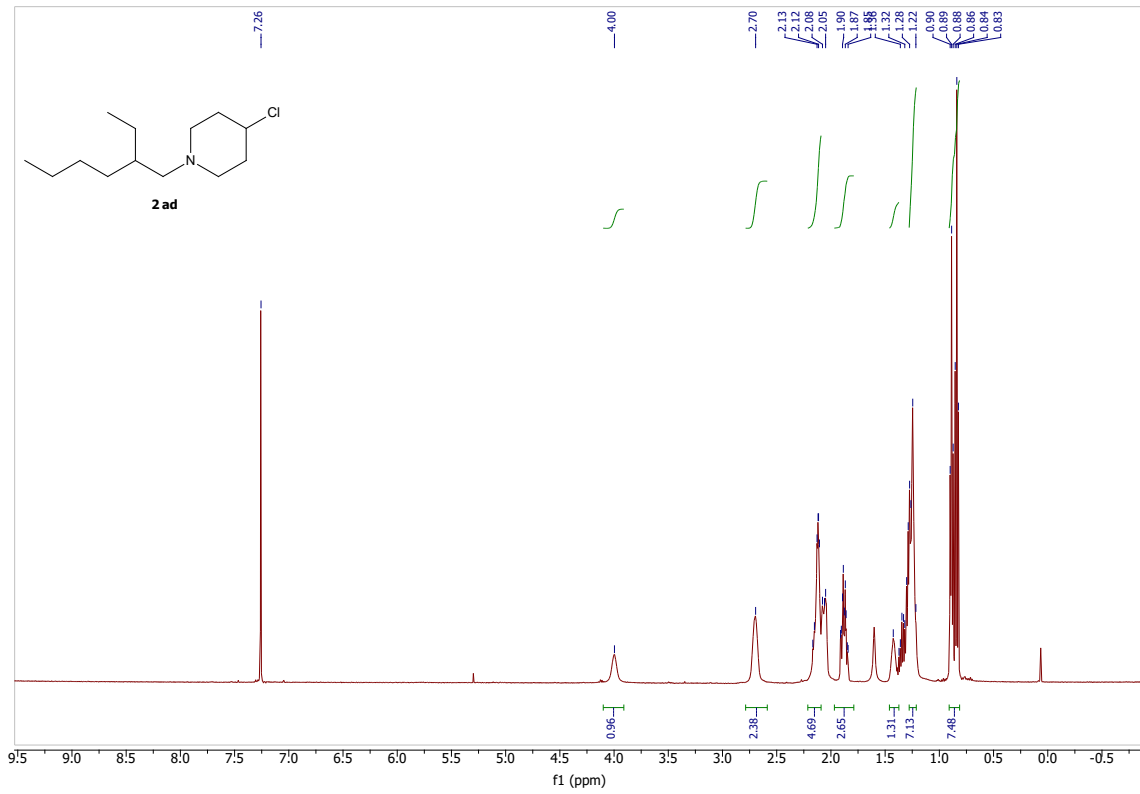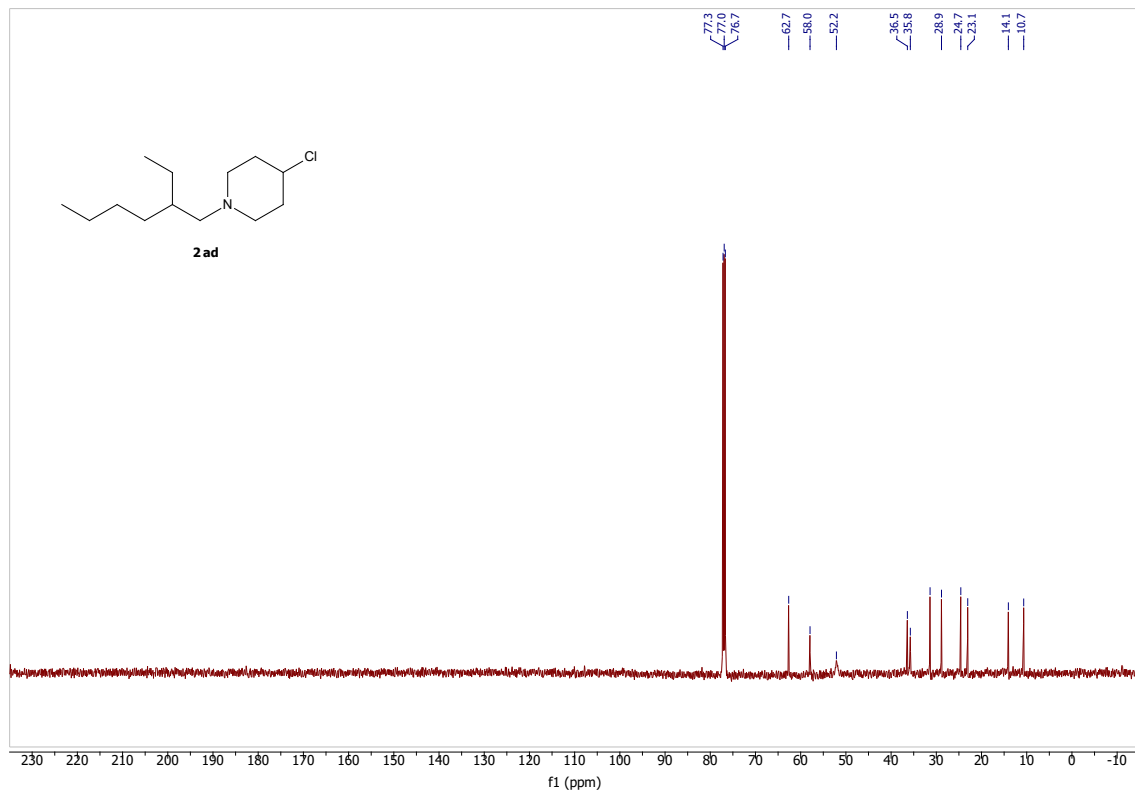



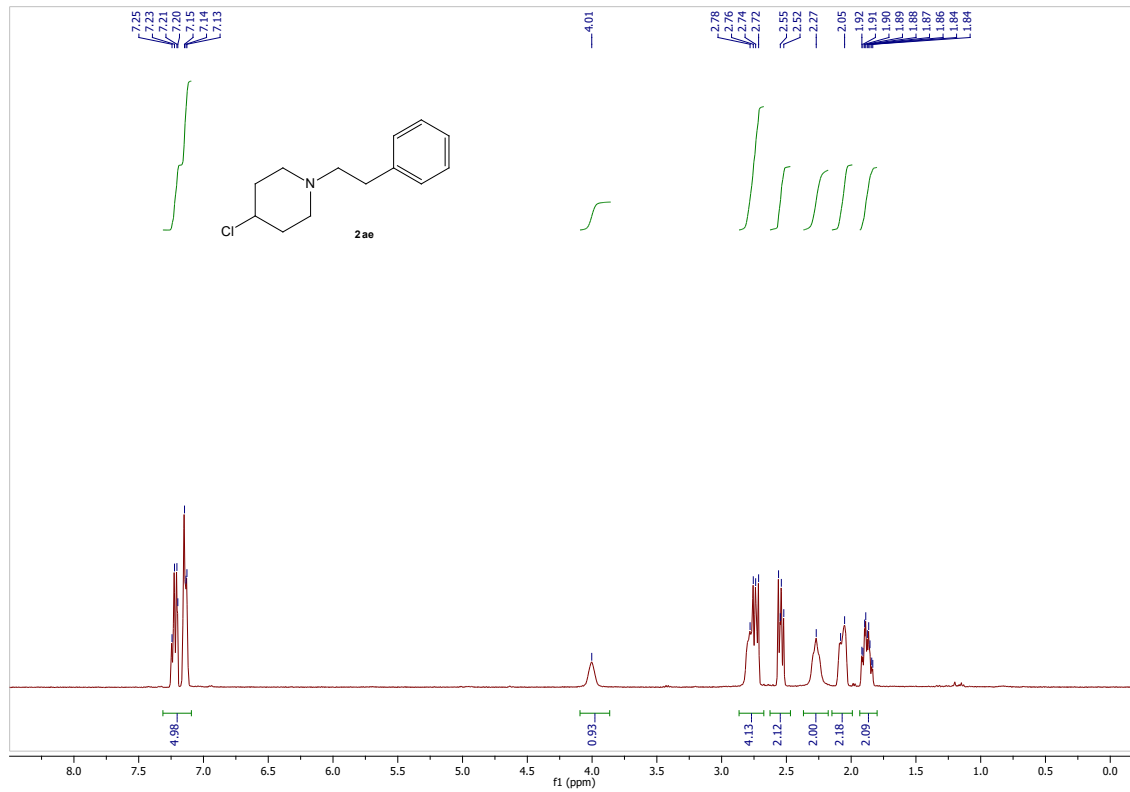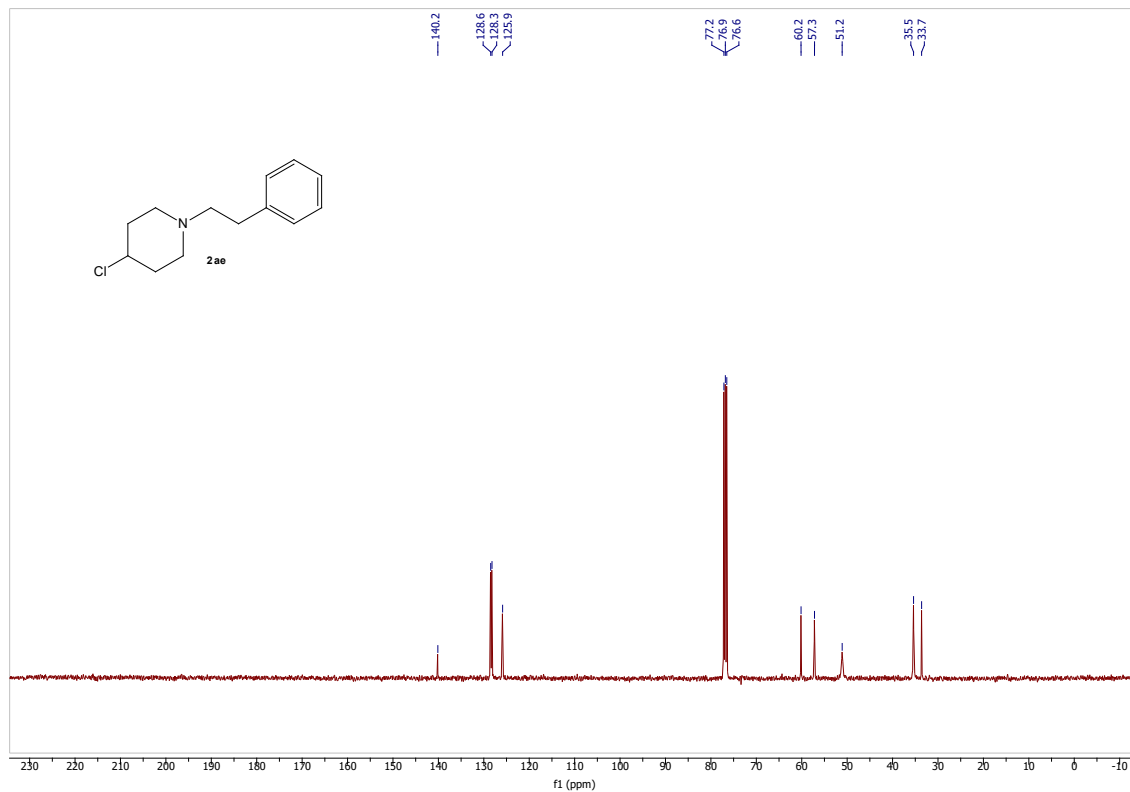

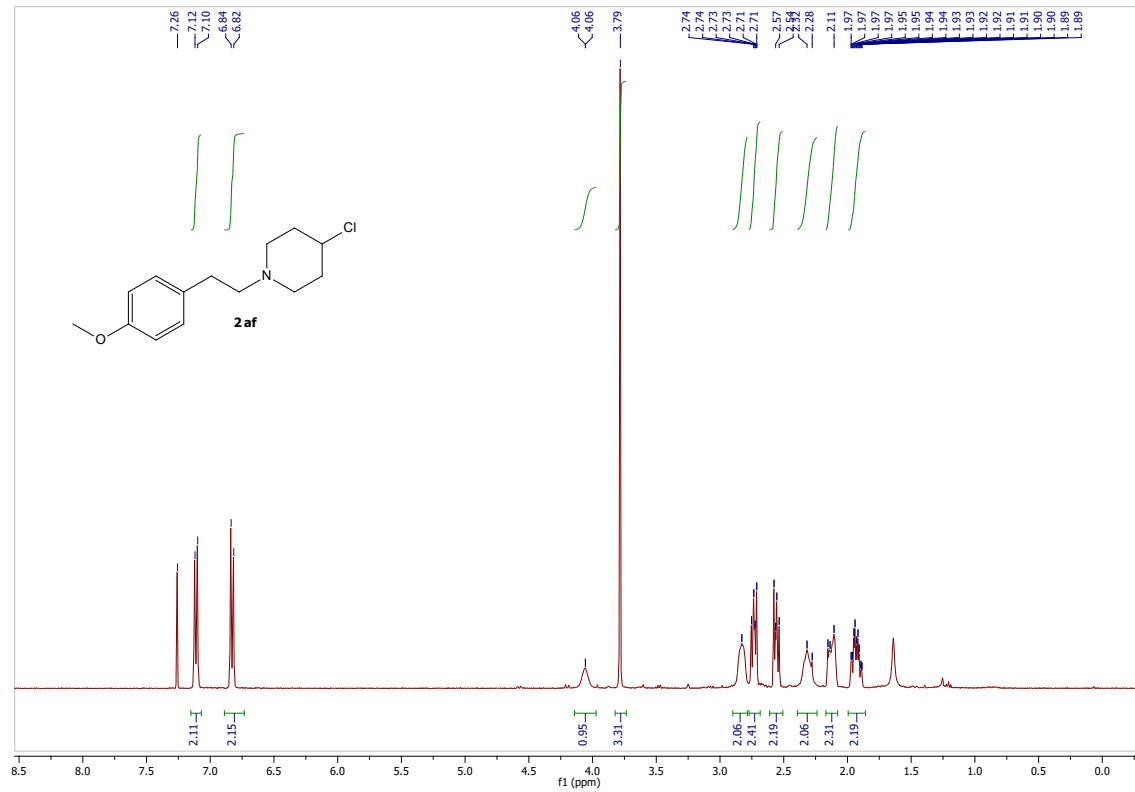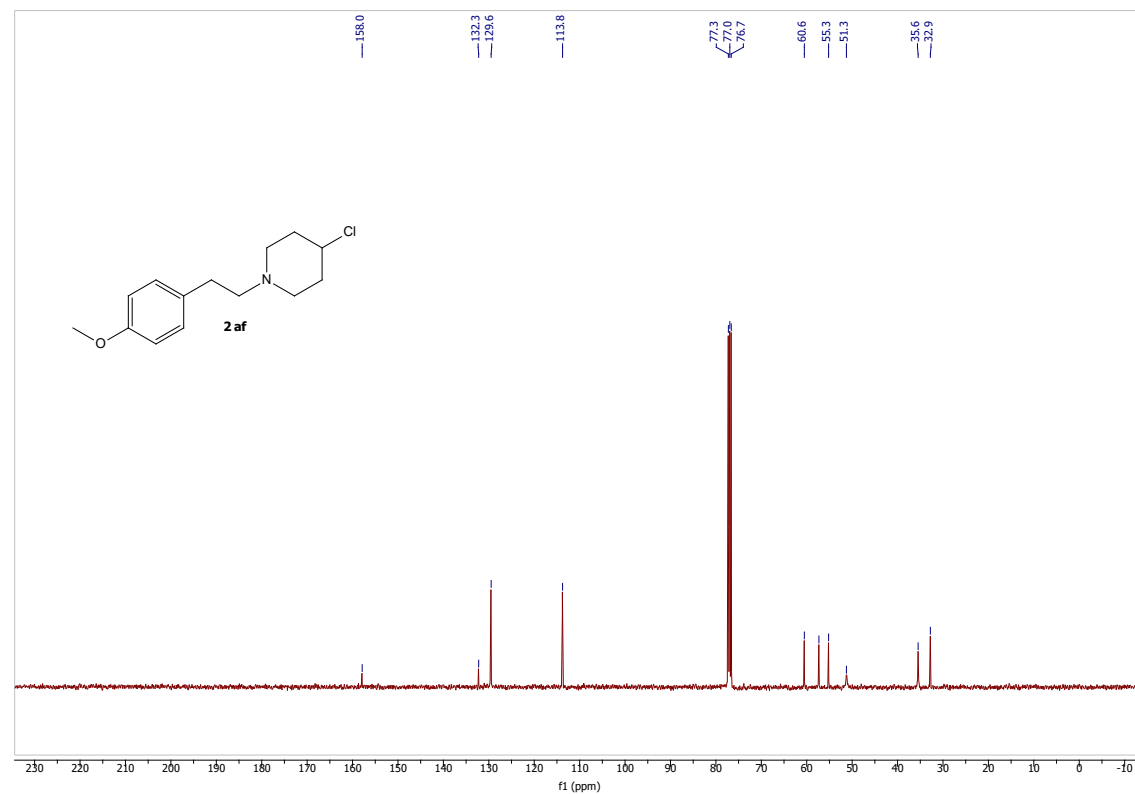

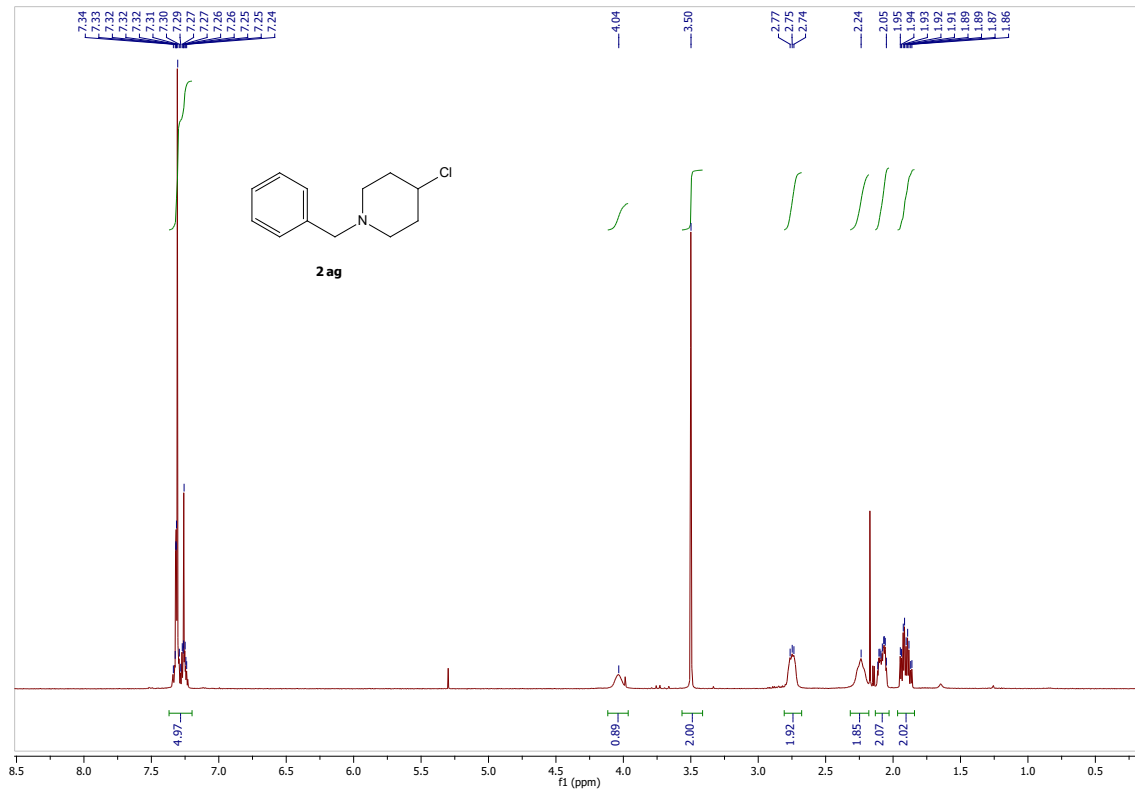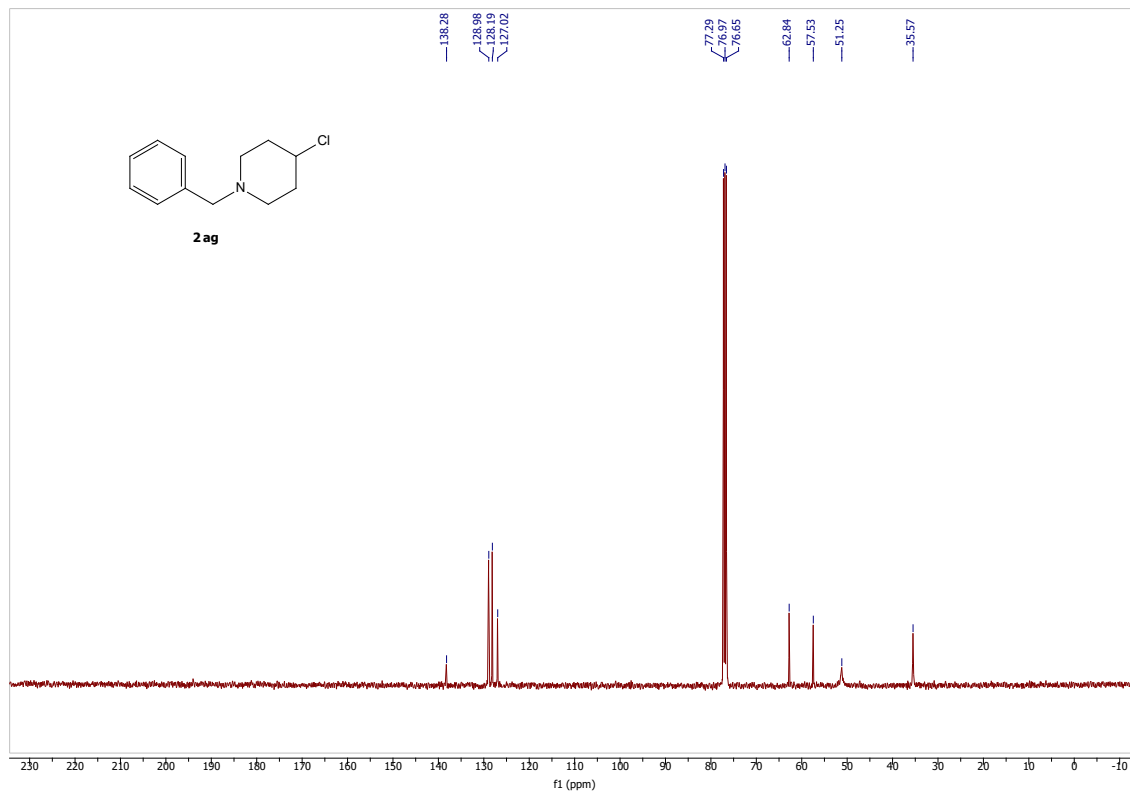

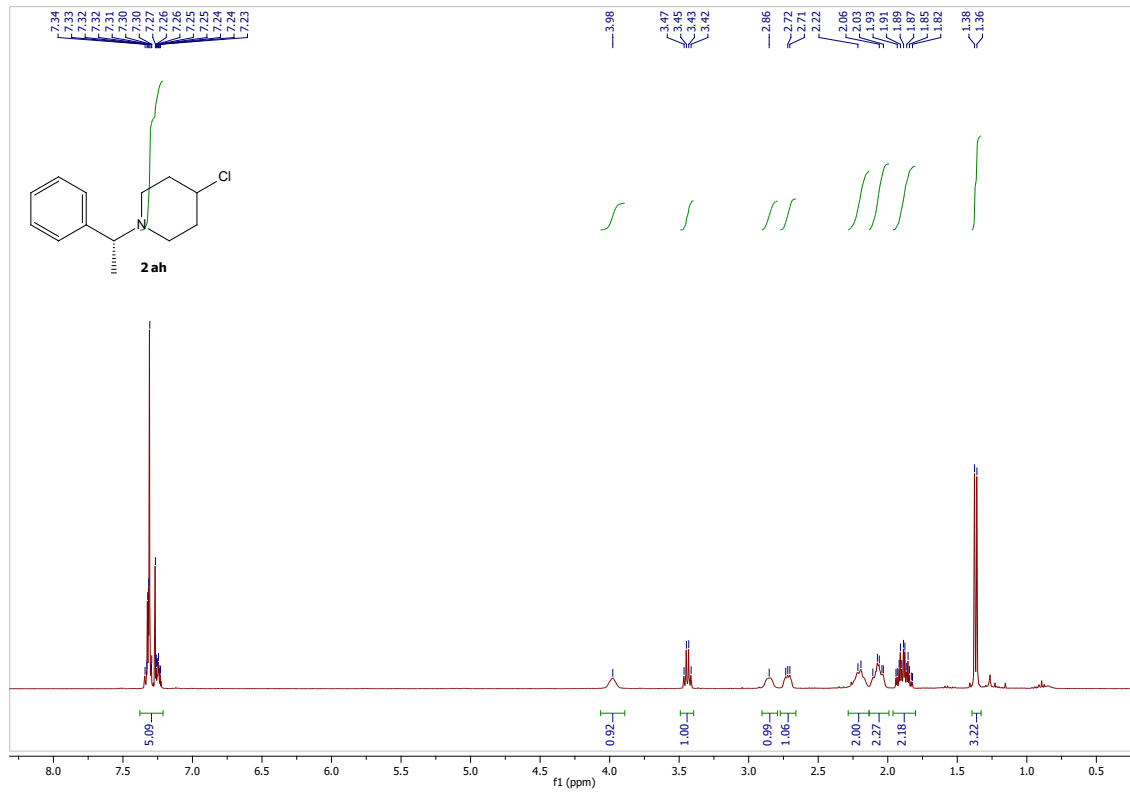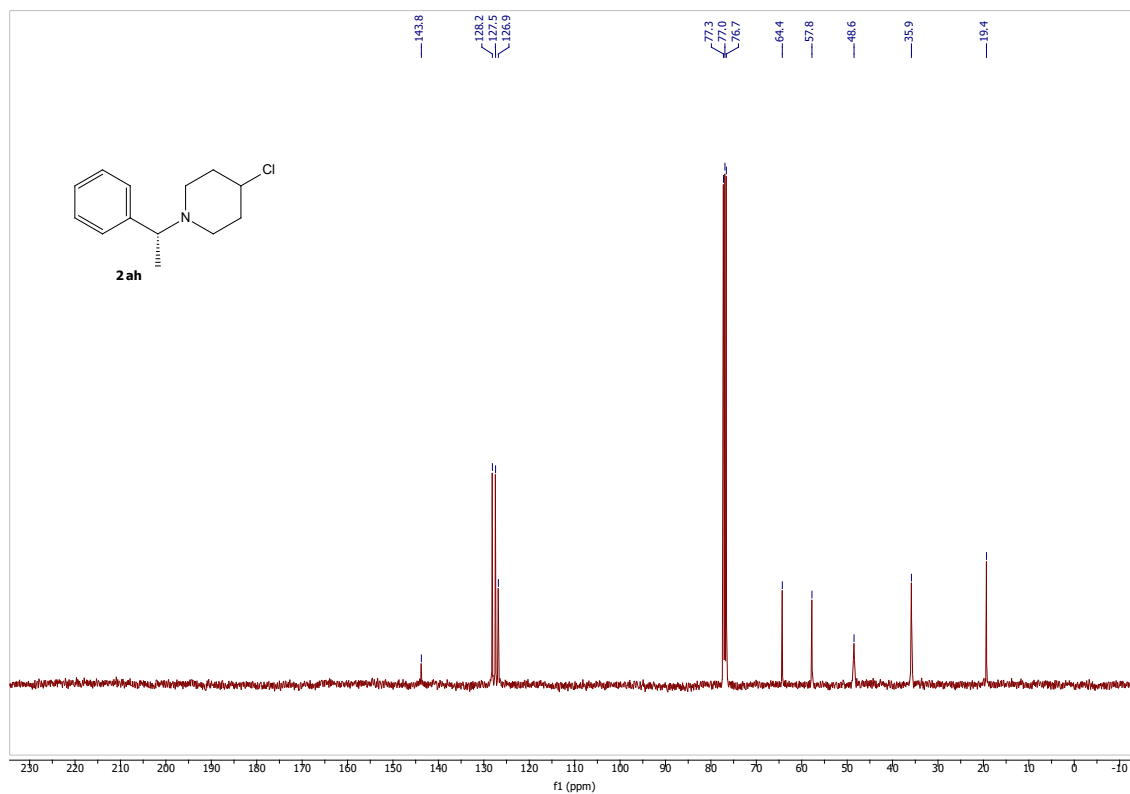

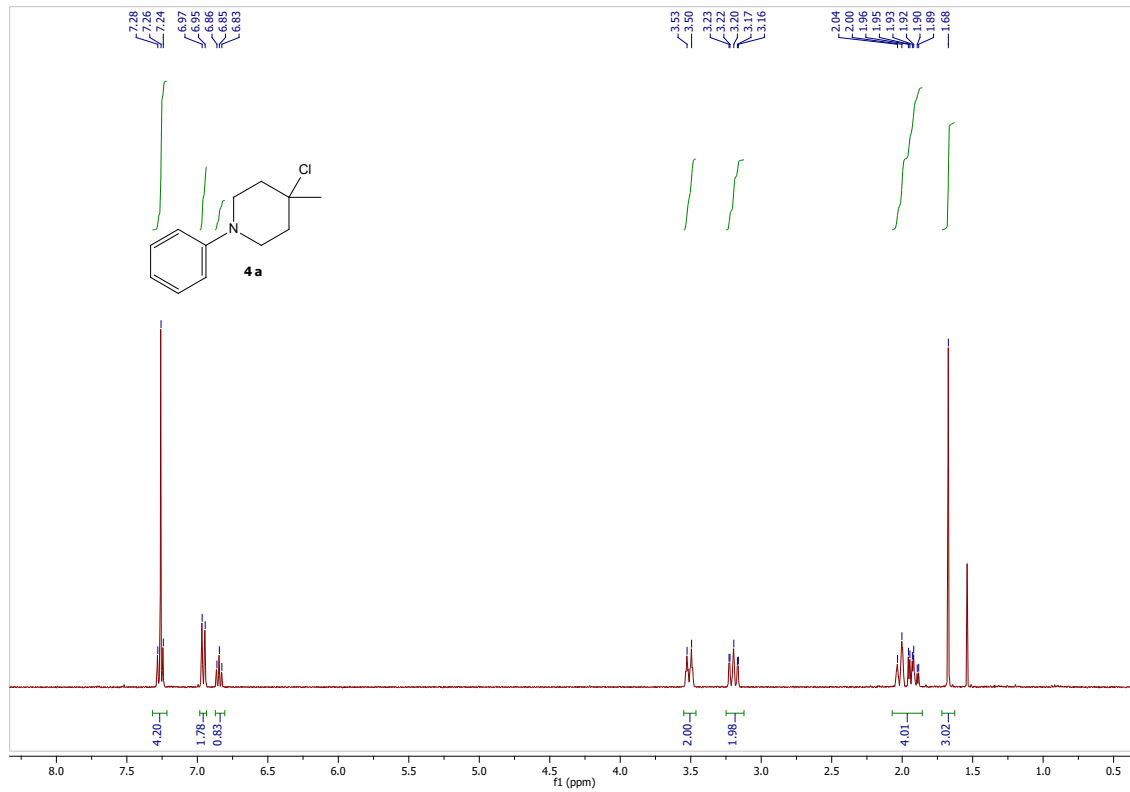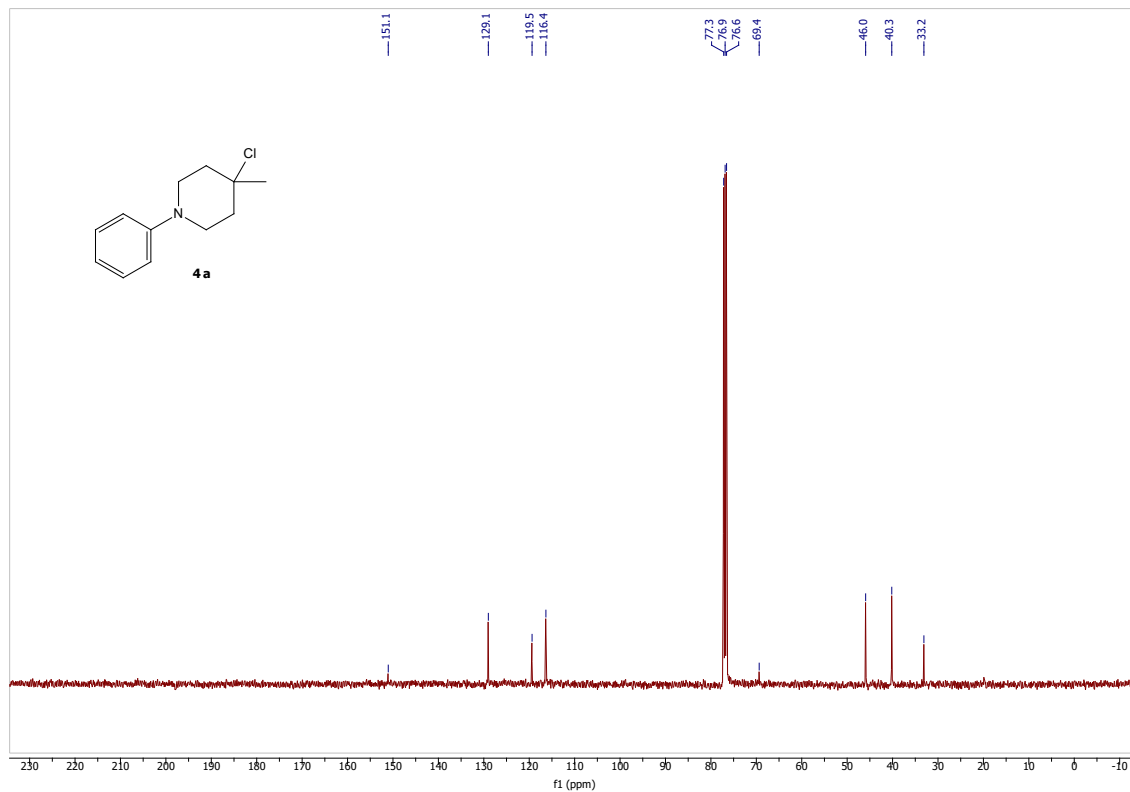

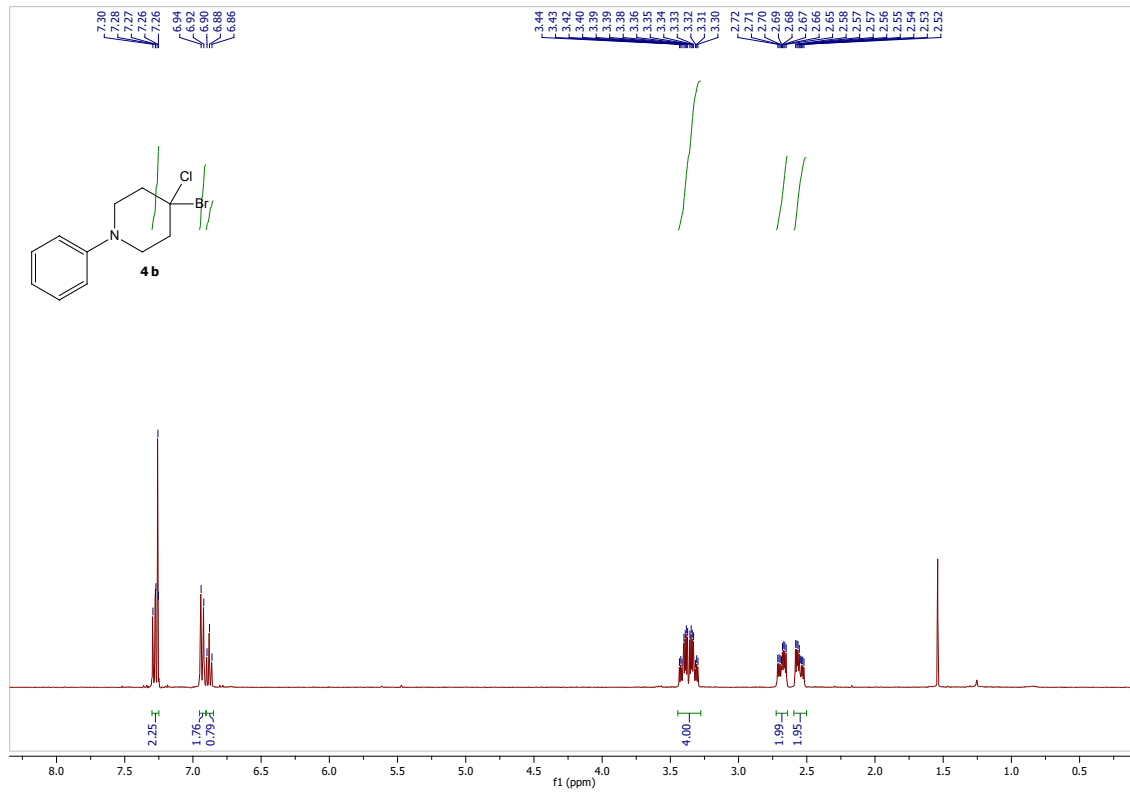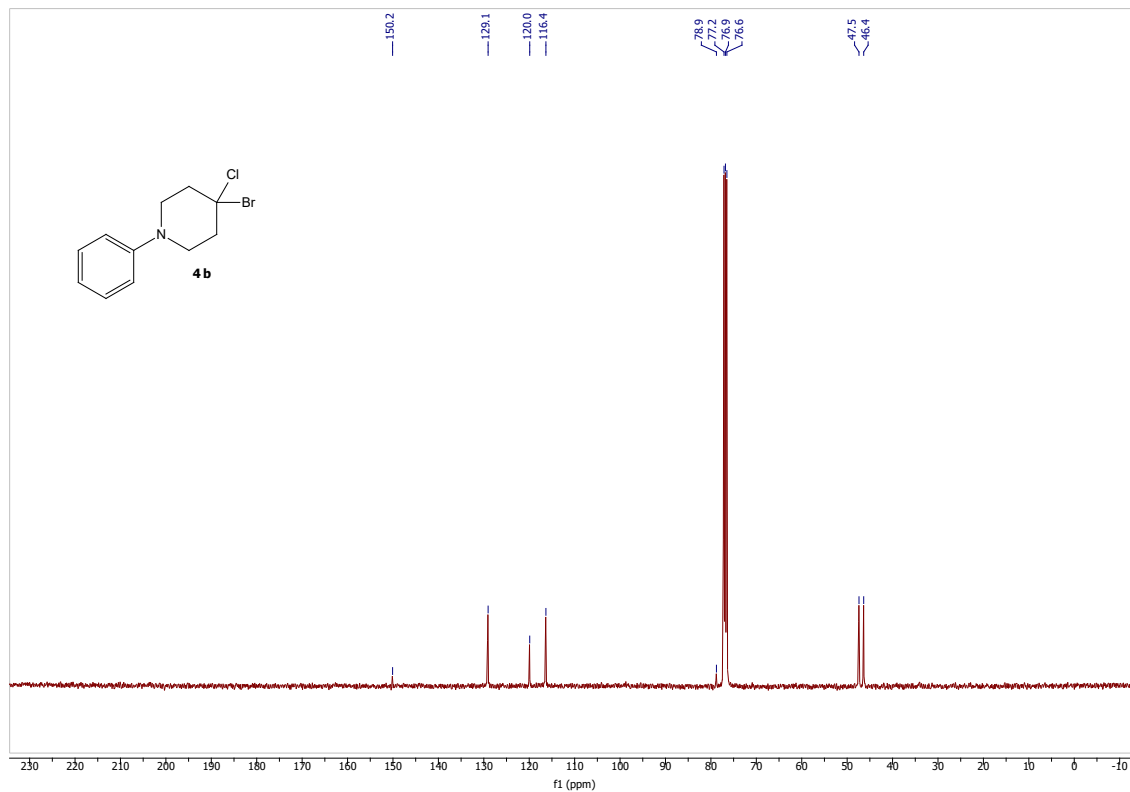

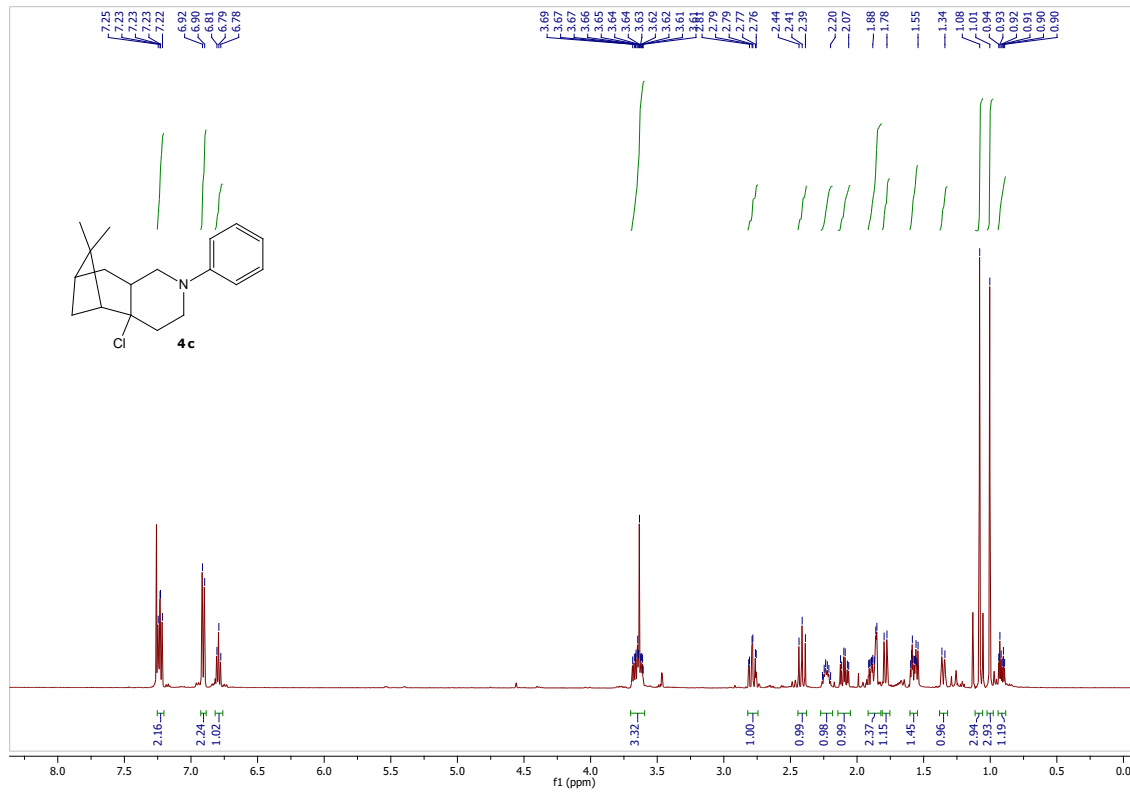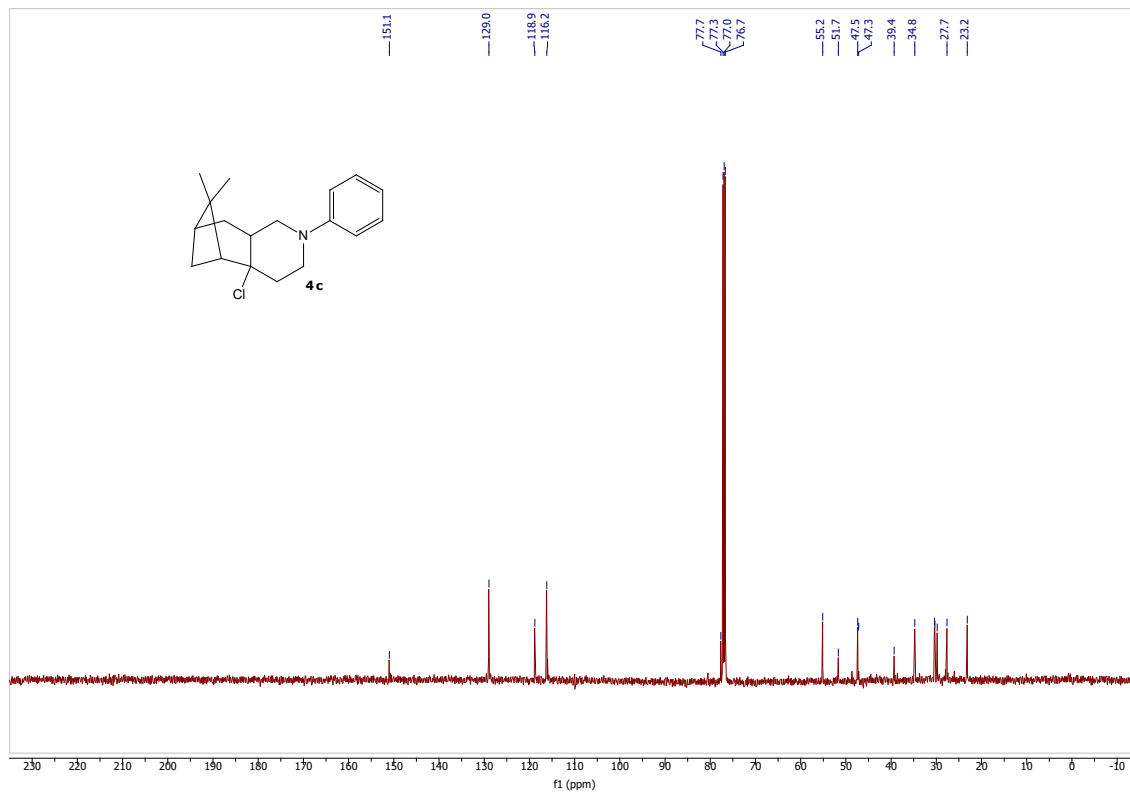

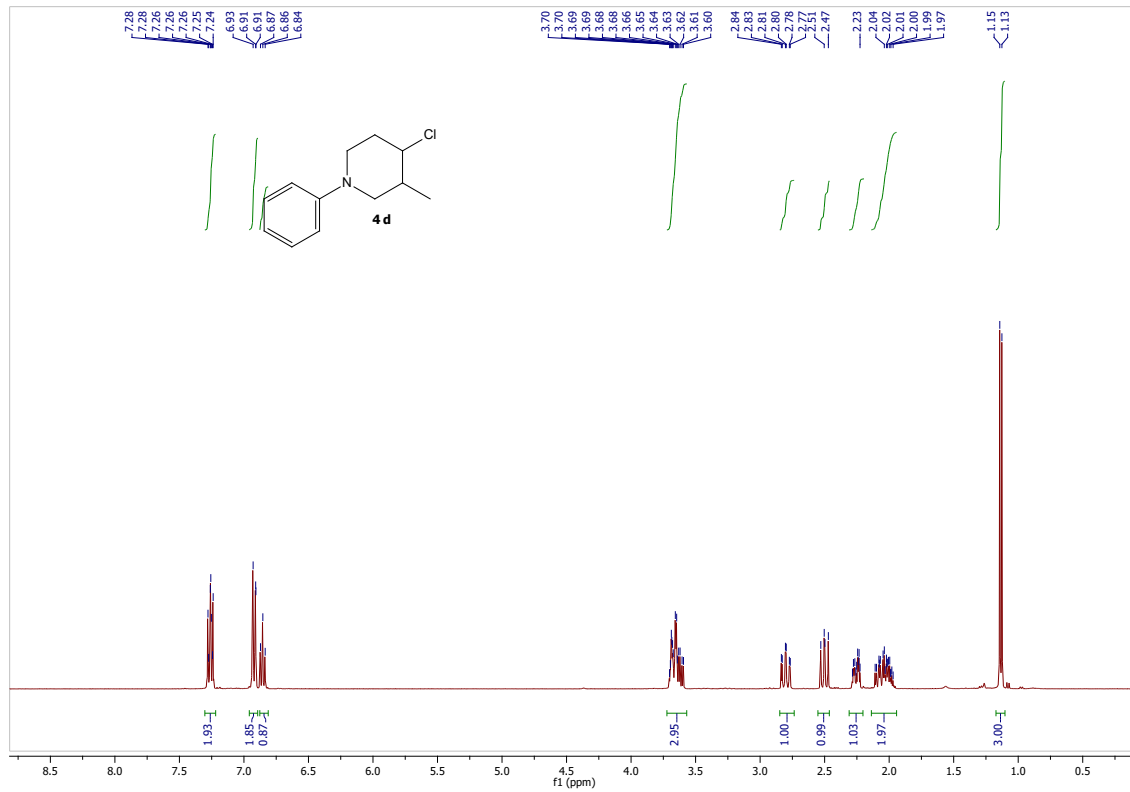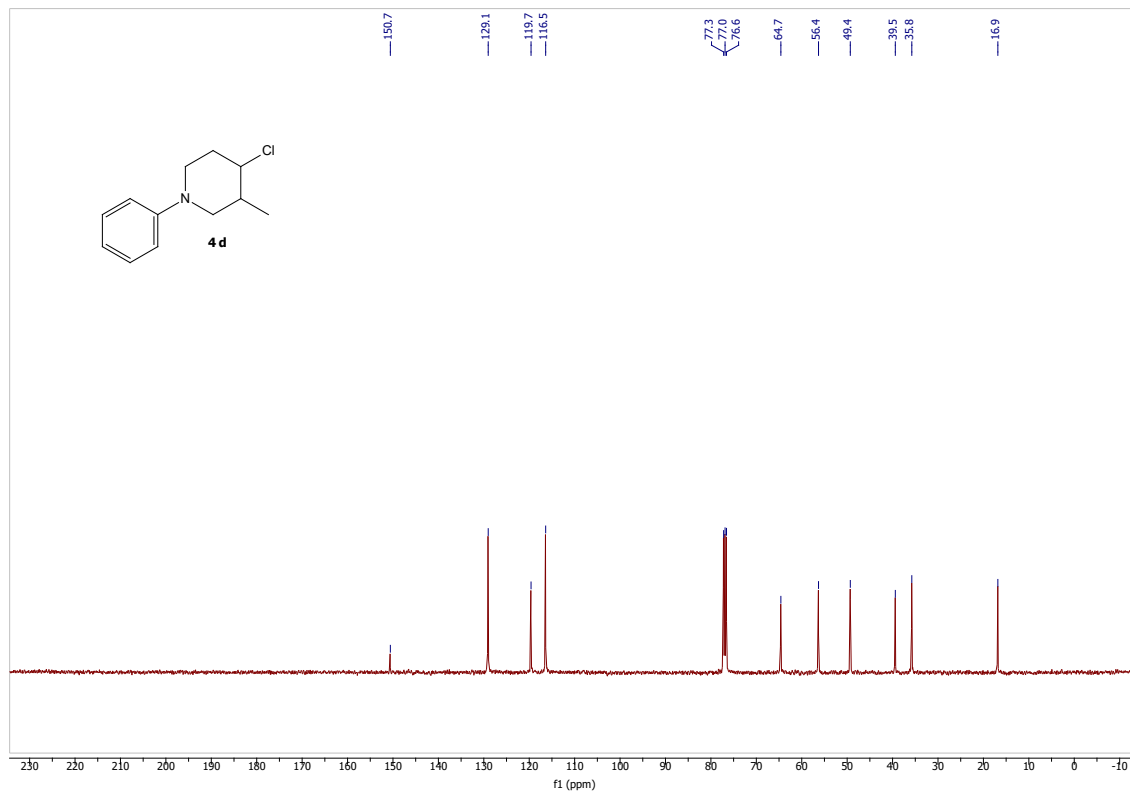



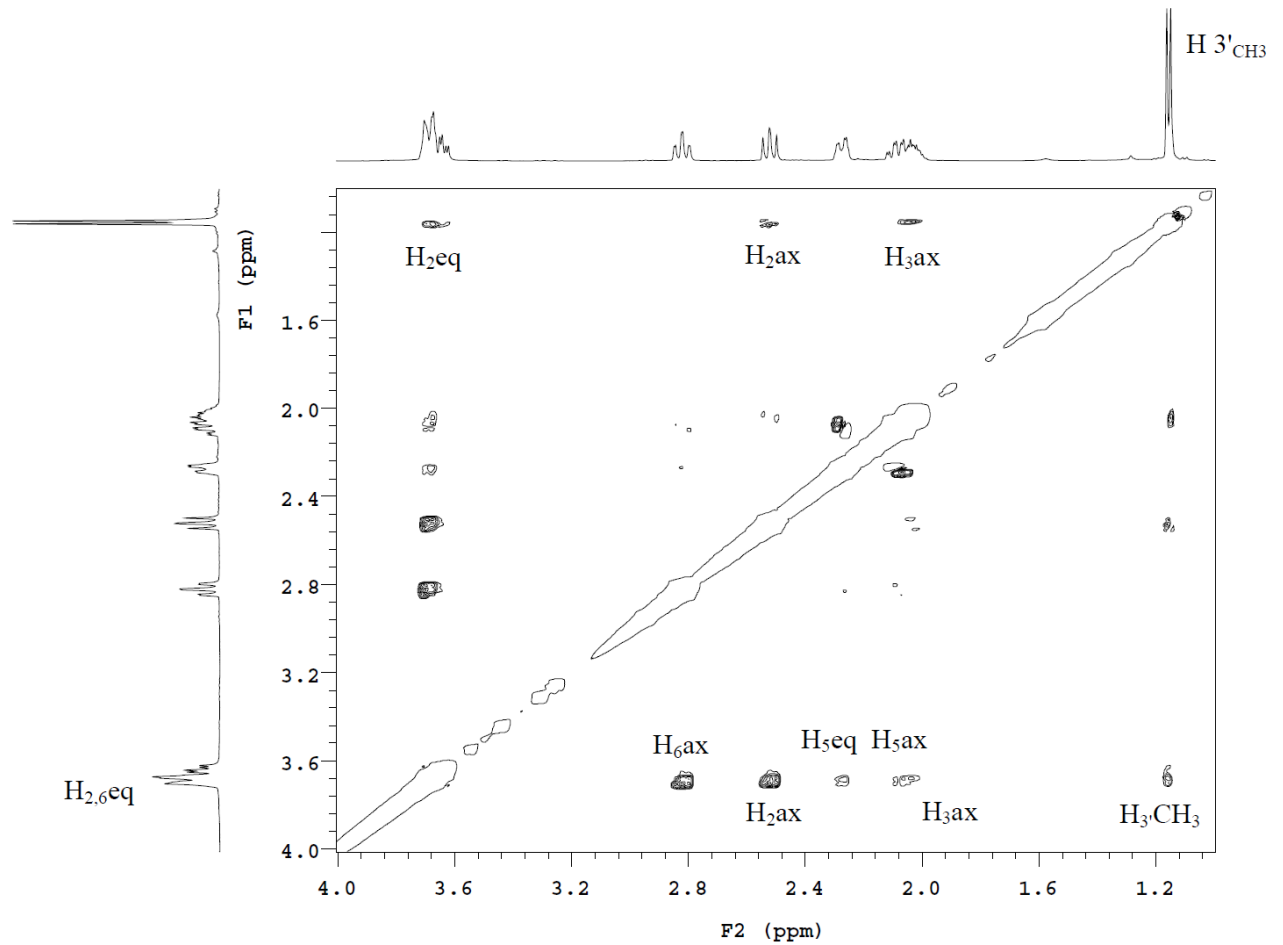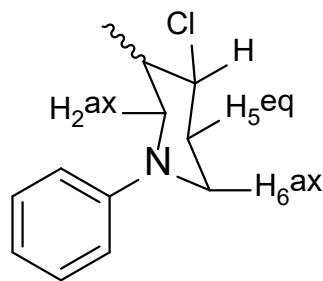

Note: Expected strong NOE between H<sub>2ax</sub> and H<sub>6ax</sub> is not observed for some reason. The CH<sub>3</sub> being equatorial should have NOE's to both H<sub>2</sub> protons as well as H<sub>3</sub> and H<sub>4</sub>, although the later may or may not be there due to the limits of resolution of overlap between H<sub>2</sub>, H<sub>6</sub> and H<sub>4</sub> around 3.65 ppm. One could argue however that lack of a CH<sub>3</sub> – H<sub>4</sub> NOE would be expected if they were both axial.

## 2. X-ray data for 2n

### 2.1 Sample preparation and crystal structure determination.

A yellow plate 0.39 x 0.38 x 0.05 mm<sup>3</sup> crystal of (**2n**) grown from a solution of hot methanol was mounted on a glass fiber for collection of x-ray data on an Agilent Technologies/Oxford Diffraction Gemini CCD diffractometer. The CrysAlisPro CCD software package (v 1.171.36.32) was used to acquire a total of 779 thirty-second frame  $\omega$ -scan exposures of data at 102K to a  $2\theta$  max = 66.24° using monochromated MoK $\alpha$  radiation (0.71073 Å) from a sealed tube. Frame data were processed using CrysAlisPro<sup>1</sup> RED to determine final unit cell parameters:  $a = 17.2486(2)$  Å,  $b = 10.17867(17)$  Å,  $c = 6.17147(11)$  Å,  $\alpha = \beta = \gamma = 90.00^\circ$ ,  $V = 1083.51(3)$  Å<sup>3</sup>,  $D_{\text{calc}} = 1.475$  Mg/m<sup>3</sup>,  $Z = 4$  to produce raw hkl data that were then corrected for absorption (transmission min./max. = 0.906/1.000;  $\mu = 0.338$  mm<sup>-1</sup>) using SCALE 3 ABSPACK. The structure was solved by Direct methods in the orthorhombic space group Pnma using SHELXS and refined by least squares methods on  $F^2$  using SHELXL. Non-hydrogen atoms were refined with anisotropic atomic displacement parameters. All methylene, methine and phenyl H's were located by difference maps and refined isotropically. For all 2160 unique reflections ( $R(\text{int}) = 0.026$ ) the final anisotropic full matrix least-squares refinement on  $F^2$  for 102 variables converged at  $R1 = 0.036$  and  $wR2 = 0.075$  with a GOF of 1.04.

### 2.2 ORTEP representation of (**2n**) with thermal ellipsoids shown at the 50% probability level.

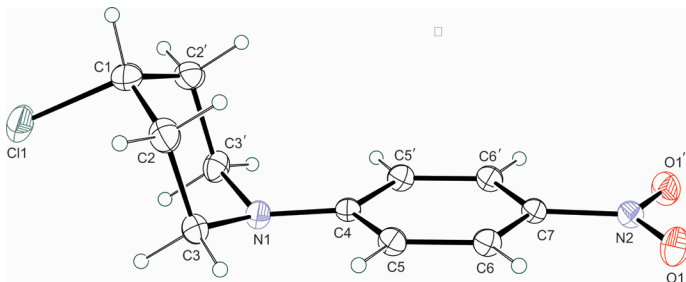

Table 1. Crystal data and structure refinement for 2n.

|                      |                             |                       |
|----------------------|-----------------------------|-----------------------|
| Identification code  | 2n                          |                       |
| Empirical formula    | C11 H13 Cl N2 O2            |                       |
| Formula weight       | 240.68                      |                       |
| Temperature          | 101.95(10) K                |                       |
| Wavelength           | 0.71073 Å                   |                       |
| Crystal system       | Orthorhombic                |                       |
| Space group          | P nma                       |                       |
| Unit cell dimensions | $a = 17.2486(2)$ Å          | $\alpha = 90^\circ$ . |
|                      | $b = 10.17867(17)$ Å        | $\beta = 90^\circ$ .  |
|                      | $c = 6.17147(11)$ Å         | $\gamma = 90^\circ$ . |
| Volume               | $1083.51(3)$ Å <sup>3</sup> |                       |

|                                   |                                             |
|-----------------------------------|---------------------------------------------|
| Z                                 | 4                                           |
| Density (calculated)              | 1.475 Mg/m <sup>3</sup>                     |
| Absorption coefficient            | 0.338 mm <sup>-1</sup>                      |
| F(000)                            | 504                                         |
| Crystal color, habit              | yellow plate                                |
| Crystal size                      | 0.39 x 0.38 x 0.05 mm <sup>3</sup>          |
| Theta range for data collection   | 3.51 to 33.12°                              |
| Index ranges                      | -26<=h<=25, -15<=k<=15, -9<=l<=9            |
| Reflections collected             | 26127                                       |
| Independent reflections           | 2160 [R(int) = 0.0265]                      |
| Completeness to theta = 33.12°    | 99.9 %                                      |
| Absorption correction             | SCALE 3 ABSPACK                             |
| Max. and min. transmission        | 1.000 and 0.906                             |
| Refinement method                 | Full-matrix least-squares on F <sup>2</sup> |
| Data / restraints / parameters    | 2160 / 0 / 102                              |
| Goodness-of-fit on F <sup>2</sup> | 1.042                                       |
| Final R indices [I>2sigma(I)]     | R1 = 0.0320, wR2 = 0.0722                   |
| R indices (all data)              | R1 = 0.0364, wR2 = 0.0746                   |
| Largest diff. peak and hole       | 0.489 and -0.344 e.Å <sup>-3</sup>          |

Table 2. Atomic coordinates ( $\times 10^4$ ) and equivalent isotropic displacement parameters ( $\text{\AA}^2 \times 10^3$ ) for 2n.  $U(\text{eq})$  is defined as one third of the trace of the orthogonalized  $U^{ij}$  tensor.

|       | x       | y       | z        | $U(\text{eq})$ |
|-------|---------|---------|----------|----------------|
| Cl(1) | 3167(1) | 2500    | 6844(1)  | 33(1)          |
| O(1)  | -466(1) | 1437(1) | -5484(1) | 25(1)          |
| N(1)  | 1383(1) | 2500    | 3151(2)  | 18(1)          |
| N(2)  | -272(1) | 2500    | -4688(2) | 18(1)          |
| C(1)  | 3040(1) | 2500    | 3903(2)  | 25(1)          |
| C(2)  | 2604(1) | 1265(1) | 3244(2)  | 24(1)          |
| C(3)  | 1761(1) | 1318(1) | 3992(2)  | 21(1)          |
| C(4)  | 1019(1) | 2500    | 1168(2)  | 15(1)          |
| C(5)  | 810(1)  | 1313(1) | 126(1)   | 17(1)          |
| C(6)  | 394(1)  | 1313(1) | -1790(1) | 17(1)          |
| C(7)  | 182(1)  | 2500    | -2727(2) | 15(1)          |

Table 3. Bond lengths [Å] and angles [°] for 2n.

---

|                   |            |
|-------------------|------------|
| Cl(1)-C(1)        | 1.8285(14) |
| O(1)-N(2)         | 1.2347(8)  |
| N(1)-C(4)         | 1.3753(15) |
| N(1)-C(3)#1       | 1.4632(11) |
| N(1)-C(3)         | 1.4632(11) |
| N(2)-O(1)#1       | 1.2347(8)  |
| N(2)-C(7)         | 1.4417(15) |
| C(1)-C(2)#1       | 1.5206(13) |
| C(1)-C(2)         | 1.5206(13) |
| C(1)-H(1)         | 0.972(19)  |
| C(2)-C(3)         | 1.5270(13) |
| C(2)-H(2A)        | 0.941(13)  |
| C(2)-H(2B)        | 0.977(13)  |
| C(3)-H(3A)        | 0.955(13)  |
| C(3)-H(3B)        | 0.998(13)  |
| C(4)-C(5)         | 1.4155(10) |
| C(4)-C(5)#1       | 1.4155(10) |
| C(5)-C(6)         | 1.3824(11) |
| C(5)-H(5)         | 0.936(12)  |
| C(6)-C(7)         | 1.3886(10) |
| C(6)-H(6)         | 0.935(12)  |
| C(7)-C(6)#1       | 1.3885(10) |
|                   |            |
| C(4)-N(1)-C(3)#1  | 121.26(5)  |
| C(4)-N(1)-C(3)    | 121.26(5)  |
| C(3)#1-N(1)-C(3)  | 110.57(10) |
| O(1)-N(2)-O(1)#1  | 122.48(10) |
| O(1)-N(2)-C(7)    | 118.75(5)  |
| O(1)#1-N(2)-C(7)  | 118.75(5)  |
| C(2)#1-C(1)-C(2)  | 111.56(11) |
| C(2)#1-C(1)-Cl(1) | 108.93(7)  |
| C(2)-C(1)-Cl(1)   | 108.93(7)  |
| C(2)#1-C(1)-H(1)  | 111.2(5)   |
| C(2)-C(1)-H(1)    | 111.2(5)   |
| Cl(1)-C(1)-H(1)   | 104.8(11)  |
| C(1)-C(2)-C(3)    | 111.16(8)  |
| C(1)-C(2)-H(2A)   | 111.1(8)   |
| C(3)-C(2)-H(2A)   | 110.0(8)   |
| C(1)-C(2)-H(2B)   | 107.1(8)   |
| C(3)-C(2)-H(2B)   | 109.2(8)   |
| H(2A)-C(2)-H(2B)  | 108.2(11)  |
| N(1)-C(3)-C(2)    | 110.27(8)  |
| N(1)-C(3)-H(3A)   | 111.6(8)   |
| C(2)-C(3)-H(3A)   | 111.5(8)   |
| N(1)-C(3)-H(3B)   | 108.1(8)   |
| C(2)-C(3)-H(3B)   | 109.5(7)   |
| H(3A)-C(3)-H(3B)  | 105.7(10)  |
| N(1)-C(4)-C(5)    | 121.39(5)  |
| N(1)-C(4)-C(5)#1  | 121.39(5)  |
| C(5)-C(4)-C(5)#1  | 117.16(10) |
| C(6)-C(5)-C(4)    | 121.40(8)  |
| C(6)-C(5)-H(5)    | 117.7(7)   |
| C(4)-C(5)-H(5)    | 120.9(7)   |
| C(5)-C(6)-C(7)    | 119.54(8)  |

|                  |            |
|------------------|------------|
| C(5)-C(6)-H(6)   | 119.7(7)   |
| C(7)-C(6)-H(6)   | 120.7(7)   |
| C(6)#1-C(7)-C(6) | 120.90(10) |
| C(6)#1-C(7)-N(2) | 119.55(5)  |
| C(6)-C(7)-N(2)   | 119.55(5)  |

---

Symmetry transformations used to generate equivalent atoms:

#1  $x, -y+1/2, z$

Table 4. Anisotropic displacement parameters ( $\text{\AA}^2 \times 10^3$ ) for gbh40ltb. The anisotropic displacement factor exponent takes the form:  $-2\pi^2 [ h^2 a^{*2} U^{11} + \dots + 2 h k a^* b^* U^{12} ]$

|       | $U^{11}$ | $U^{22}$ | $U^{33}$ | $U^{23}$ | $U^{13}$ | $U^{12}$ |
|-------|----------|----------|----------|----------|----------|----------|
| Cl(1) | 22(1)    | 50(1)    | 25(1)    | 0        | -8(1)    | 0        |
| O(1)  | 28(1)    | 22(1)    | 24(1)    | -7(1)    | -6(1)    | 0(1)     |
| N(1)  | 18(1)    | 20(1)    | 17(1)    | 0        | -2(1)    | 0        |
| N(2)  | 17(1)    | 20(1)    | 16(1)    | 0        | 0(1)     | 0        |
| C(1)  | 17(1)    | 37(1)    | 21(1)    | 0        | 3(1)     | 0        |
| C(2)  | 23(1)    | 27(1)    | 21(1)    | 1(1)     | 1(1)     | 7(1)     |
| C(3)  | 20(1)    | 23(1)    | 19(1)    | 5(1)     | -3(1)    | -1(1)    |
| C(4)  | 13(1)    | 17(1)    | 15(1)    | 0        | 1(1)     | 0        |
| C(5)  | 19(1)    | 14(1)    | 18(1)    | 1(1)     | 0(1)     | 1(1)     |
| C(6)  | 18(1)    | 15(1)    | 17(1)    | -1(1)    | 1(1)     | -1(1)    |
| C(7)  | 15(1)    | 16(1)    | 14(1)    | 0        | 0(1)     | 0        |

Table 5. Hydrogen coordinates ( $\times 10^4$ ) and isotropic displacement parameters ( $\text{\AA}^2 \times 10^{-3}$ ) for 2n.

|       | x        | y        | z         | U(eq) |
|-------|----------|----------|-----------|-------|
| H(1)  | 3564(11) | 2500     | 3320(30)  | 30    |
| H(2A) | 2846(7)  | 508(13)  | 3800(20)  | 28    |
| H(2B) | 2619(8)  | 1218(13) | 1660(20)  | 28    |
| H(3A) | 1485(7)  | 541(13)  | 3590(20)  | 25    |
| H(3B) | 1742(7)  | 1354(13) | 5610(20)  | 25    |
| H(5)  | 941(7)   | 499(12)  | 727(19)   | 21    |
| H(6)  | 262(7)   | 516(12)  | -2440(20) | 20    |



Table 6. Torsion angles [°] for 2n.

|                         |            |
|-------------------------|------------|
| C(2)#1-C(1)-C(2)-C(3)   | -50.40(13) |
| Cl(1)-C(1)-C(2)-C(3)    | 69.88(9)   |
| C(4)-N(1)-C(3)-C(2)     | 88.96(11)  |
| C(3)#1-N(1)-C(3)-C(2)   | -62.21(12) |
| C(1)-C(2)-C(3)-N(1)     | 55.97(11)  |
| C(3)#1-N(1)-C(4)-C(5)   | 165.40(9)  |
| C(3)-N(1)-C(4)-C(5)     | 17.28(15)  |
| C(3)#1-N(1)-C(4)-C(5)#1 | -17.28(15) |
| C(3)-N(1)-C(4)-C(5)#1   | -165.40(9) |
| N(1)-C(4)-C(5)-C(6)     | 175.18(9)  |
| C(5)#1-C(4)-C(5)-C(6)   | -2.25(15)  |
| C(4)-C(5)-C(6)-C(7)     | 0.55(13)   |
| C(5)-C(6)-C(7)-C(6)#1   | 1.26(16)   |
| C(5)-C(6)-C(7)-N(2)     | -178.08(9) |
| O(1)-N(2)-C(7)-C(6)#1   | -178.93(9) |
| O(1)#1-N(2)-C(7)-C(6)#1 | -0.42(15)  |
| O(1)-N(2)-C(7)-C(6)     | 0.42(15)   |
| O(1)#1-N(2)-C(7)-C(6)   | 178.93(9)  |

Symmetry transformations used to generate equivalent atoms:

#1 x,-y+1/2,z

### 3. References

1. Kuznetsov, N. Y.; Tikhov, R. M.; Strelkova, T. V.; Bubnov, Y. N. Dimethylamine adducts of allylic triorganoboranes as effective reagents for Petasis-type homoallylation of primary amines with formaldehyde. *Org. Biomol. Chem.* **2018**, *16*, 7115-7119.
2. Rassadin Valentin, A. Facile Access to Bicyclic Sultams with Methyl 1-Sulfonylcyclopropane-1-carboxylate Moieties. *Eur. J. Org. Chem.* **2009**, 26352641, 2635-2641.
3. Durel, V.; Lalli, C.; Roisnel, T.; Weghe, P. v. d. Synergistic Effect of the TiCl<sub>4</sub>/p-TsOH Promoter System on the Aza-Prins Cyclization. *J. Org. Chem.* **2016**, *81*, 849-859.
4. Olivares-Romero, J. L.; Li, Z.; Yamamoto, H. Hf(IV)-Catalyzed Enantioselective Epoxidation of N-Alkenyl Sulfonamides and N-Tosyl Imines. *J. Am. Chem. Soc.* **2012**, *134*, 5440-5443.
5. Shieh, W.-C.; Chen, G.-P.; Xue, S.; McKenna, J.; Jiang, X.; Prasad, K.; Repič, O.; Straub, C.; Sharma, S. K. A Facile Preparation of an Octahydropyrrolo[2,3-c]pyridine Enantiomer. *Org. Process Res. Dev.* **2007**, *11*, 711-715.
6. Romero-Ibañez, J.; Xochicale-Santana, L.; Quintero, L.; Fuentes, L.; Sartillo-Piscil, F. Synthesis of the Enantiomers of Tedanalactam and the First Total Synthesis and Configurational Assignment of (+)-Piplaroxide. *J. Nat. Prod.* **2016**, *79*, 1174-1178.
7. Chen, C. Synthesis of substituted  $\gamma$ -lactam via Pd(0)-catalyzed cyclization of alkene-tethered carbamoyl chloride. *Tetrahedron Lett.* **2014**, *55*, 3229-3231.
8. Sorribes, I.; Junge, K.; Beller, M. Direct Catalytic N-Alkylation of Amines with Carboxylic Acids. *J. Am. Chem. Soc.* **2014**, *136*, 14314-14319.
9. Nishida, Y. Dimethylzinc-Mediated Chlorolactamization of Homoallylic Amines with Chloroform. *Eur. J. Org. Chem.* **2016**, 2016, 22-25.
10. Kang, S.; Kim, R. Y.; Seo, M. J.; Lee, S.; Kim, Y. M.; Seo, M.; Seo, J. J.; Ko, Y.; Choi, I.; Jang, J.; Nam, J.; Park, S.; Kang, H.; Kim, H. J.; Kim, J.; Ahn, S.; Pethe, K.; Nam, K.; No, Z.; Kim, J. Lead Optimization of a Novel Series of Imidazo[1,2-a]pyridine Amides Leading to a Clinical Candidate

(Q203) as a Multi- and Extensively-Drug-Resistant Anti-tuberculosis Agent. *J. Med. Chem.* **2014**, *57*, 5293-5305.

11. Liu, G.-Q.; Cui, B.; Xu, R.; Li, Y.-M. Preparation of trans-2-Substituted-4-halopiperidines and cis-2-Substituted-4-halotetrahydropyrans via AlCl<sub>3</sub>-Catalyzed Prins Reaction. *J. Org. Chem.* **2016**, *81*, 5144-5161.

12. Jonczyk, A. Search for a new method for synthesis of the analgesic agent "Fentanyl". *Przem. Chem.* **1978**, *57*, 131-134.

13. Nallasivam Jothi, L. A Cascade Aza-Cope/Aza-Prins Cyclization Leading to Piperidine Derivatives. *Eur. J. Org. Chem.* **2015**, *2015*, 2012-2022.
